# Supplementary material for: 4‐Methyltetrahydropyran (4‐MeTHP): Application as an Organic Reaction Solvent
Source: PubMed Central journal article supplement (PMC6916367; doi:10.1002/asia.201901169), 2019-10-16

# CHEMISTRY

---

## AN **ASIAN** JOURNAL

### Supporting Information

#### **4-Methyltetrahydropyran (4-MeTHP): Application as an Organic Reaction Solvent**

Shoji Kobayashi,\* Tomoki Tamura, Saki Yoshimoto, Takashi Kawakami, and Araki Masuyama<sup>[a]</sup>

asia\_201901169\_sm\_miscellaneous\_information.pdf

|                                                                                |            |
|--------------------------------------------------------------------------------|------------|
| <b>1. A PRICE LIST OF COMMERCIALLY AVAILABLE SOLVENTS.</b>                     | <b>S2</b>  |
| <b>2. SOLVENT RECOVERY EXPERIMENTS AND GC-MS ANALYSES.</b>                     | <b>S3</b>  |
| 2.1. ANALYTICAL CONDITIONS                                                     | S3         |
| 2.2. RADICAL ADDITION IN 4-METHP                                               | S4         |
| 2.3. RADICAL ADDITION IN THP                                                   | S7         |
| 2.4. RADICAL ADDITION IN 2-METHF.                                              | S10        |
| <b>3. <sup>1</sup>H AND <sup>13</sup>C NMR SPECTRA OF SYNTHETIC COMPOUNDS.</b> | <b>S13</b> |

## 1. A price list of commercially available solvents

**Table S1.** Price of commercially available solvents<sup>a</sup>

| Supplier                   | Solvent | Grade                                            | Content | Price  |        |
|----------------------------|---------|--------------------------------------------------|---------|--------|--------|
|                            |         |                                                  |         | JPY    | USD    |
| Sigma-Aldrich <sup>b</sup> | 4-MeTHP | - (unavailable)                                  | -       | -      | -      |
|                            | THP     | 99% (anhydrous)                                  | 100 mL  | 22,400 | 178.00 |
|                            | CPME    | ≥99.90% <sup>c</sup> (ReagentPlus <sup>®</sup> ) | 500 mL  | 11,100 | 82.40  |
|                            | 2-MeTHF | ≥99.5% <sup>c</sup> (ReagentPlus <sup>®</sup> )  | 500 mL  | 20,600 | 143.00 |
|                            | THF     | ≥99.0% <sup>c</sup> (ACS reagent)                | 500 mL  | 10,600 | 84.90  |
| TCI <sup>c</sup>           | 4-MeTHP | > 99.0% (GC) <sup>e</sup>                        | 500 mL  | 3,500  | -      |
|                            | THP     | > 98.0% (GC)                                     | 500 mL  | 22,300 | 126.00 |
|                            | CPME    | > 99.5% (GC) <sup>e</sup>                        | 500 mL  | 3,600  | 33.00  |
|                            | 2-MeTHF | > 98.0% (GC) <sup>e</sup>                        | 500 mL  | 10,900 | 70.00  |
|                            | THF     | > 99.5% (GC) <sup>e</sup>                        | 500 mL  | 3,100  | 24.00  |
| Fujifilm Wako <sup>d</sup> | 4-MeTHP | > 99.0% (Capillary GC) <sup>e</sup>              | 500 mL  | 3,500  | 39.00  |
|                            | THP     | > 98.0% (Capillary GC)                           | 500 mL  | 35,000 | 385.00 |
|                            | CPME    | > 98.0% (Capillary GC) <sup>e</sup>              | 500 mL  | 3,600  | 40.00  |
|                            | 2-MeTHF | > 98.0% (Capillary GC) <sup>e</sup>              | 500 mL  | 18,000 | 198.00 |
|                            | THF     | > 99.5% (Capillary GC)                           | 500 mL  | 1,950  | 22.00  |

<sup>a</sup> The data were collected on September 11, 2019. A safety data sheet (SDS) of solvent is available from the supplier's web page.

<sup>b</sup> <https://www.sigmaaldrich.com/united-states.html> <https://www.sigmaaldrich.com/japan.html>

<sup>c</sup> <https://www.tcichemicals.com/en/us/index.html> <https://www.tcichemicals.com/en/jp/index.html>

<sup>d</sup> <https://labchem-wako.fujifilm.com/us/index.html> <https://labchem-wako.fujifilm.com/jp/index.html>

<sup>e</sup> Stabilized with BHT.

## 2. Solvent recovery experiments and GC-MS analyses

### 2.1. Analytical conditions

#### **GC conditions**

Gas-phase chromatography was performed on a GC-2014 instrument using a DB-WAX column (30 m × 0.25 mm × 0.25 μm film thickness). A temperature of FID detector was adjusted to 250 °C. The oven was heated at 50 °C for 5 min followed by a temperature gradient of 10 °C/min to 200 °C and, finally, at 200 °C for 5 min. Inlet temperature and pressure were 200 °C and 83 kPa, respectively, with a split ratio of 100:1. Helium was used as the carrier gas at a flow rate of 1.0 mL/min.

#### **GC-MS conditions**

The gas chromatograph-mass spectrometry model GCMS-QP2010 Ultra (SHIMADZU CORPORATION, Japan), equipped with DB-WAX capillary column with dimensions 30 m × 0.25 mm × 0.25 μm, was used. The oven was maintained at 50 °C for 5 min followed by a temperature gradient of 10 °C/min to 200 °C and, finally, at 200 °C for 5 min. The injection volume of the sample was 0.2 μL with a split ratio of 100:1, using helium as the carrier gas at a flow rate of 1.0 ml/min. Injector temperature was maintained at 200°C. Detector temperature was maintained at 230 °C. The percentage composition was calculated using peak normalization method assuming equal detector response. The samples were analyzed with an electron impact ionization at 70 eV. The compounds separated were characterized from their mass spectral data using the NIST14 mass spectral library.



## 2.2. Radical addition in 4-MeTHP

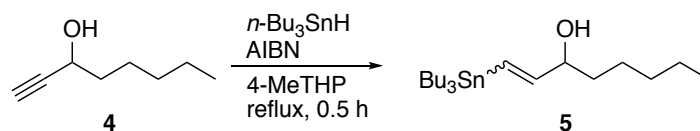

### Experimental procedure

Commercially available 4-MeTHP (stabilized with BHT) was stored with molecular sieves 4Å and used for the reaction (sample 1). Oct-1-yn-3-ol (**4**) (126 mg, 0.996 mmol), *n*-Bu<sub>3</sub>SnH (378 mg, 1.30 mmol), and AIBN (32.8 mg, 0.200 mmol) were placed in a 100 mL two-necked round bottom flask equipped with a reflux condenser. The flask was flushed with argon and 4-MeTHP (20 mL) was added. After complete dissolution of AIBN at room temperature, the solution was heated at reflux for 30 min. The solution was stood at room temperature and, after attachment of the distillation apparatus, the solvent was distilled under reduced pressure (bp 38-40 °C/8-10 kPa) (sample 2). The residual oil was purified by flash chromatography on silica gel (*n*-hexane/EtOAc/Et<sub>3</sub>N = 50/1/0.5) to give stannane **5** (288 mg, 0.691 mmol, 69%, *E/Z*=16:1) as a pale yellow oil. The purity of the recovered 4-MeTHP was determined to be 99.94% by the GC analysis. The same experiment was performed with the recovered 4-MeTHP, providing the product **5** (64% yield, *E/Z*=8:1) with a recovery of 4-MeTHP (purity: 99.88%) (sample 3).

### Compound characterization list analyzed by GC-MS<sup>a</sup>

|           |                      |                   |           |             |                  |         |
|-----------|----------------------|-------------------|-----------|-------------|------------------|---------|
| t (min)   | 2.2                  | 2.5               | 2.9       | 3.6         | 4.1              | 4.5     |
| name      | acetone <sup>b</sup> | unknown           | unknown   | 4-MeTHP     | isobutyronitrile | unknown |
| structure |                      |                   |           |             |                  |         |
| #         |                      |                   |           |             | <b>A</b>         |         |
| sample 1  | -                    | 0.03%             | 0.19%     | 99.21%      | -                | 0.05%   |
| sample 2  | 0.01%                | 0.06%             | 0.15%     | 98.54%      | 0.37%            | 0.05%   |
| sample 3  | 0.02%                | 0.14%             | 0.13%     | 98.20%      | 0.62%            | 0.05%   |
| t (min)   | 5.3                  | 5.8               | 7.6       | 9.0         | 16.0             | 19.3    |
| name      | water                | isopentyl formate | 1-butanol | isopentanol | AIBN             | BHT     |
| structure | H <sub>2</sub> O     |                   |           |             |                  |         |
| #         | <b>B</b>             | <b>C</b>          | <b>D</b>  | <b>E</b>    |                  |         |
| sample 1  | 0.27%                | 0.06%             | -         | -           | -                | 0.09%   |
| sample 2  | 0.42%                | 0.09%             | 0.09%     | 0.03%       | 0.06%            | -       |
| sample 3  | 0.38%                | 0.13%             | 0.17%     | 0.06%       | 0.04%            | -       |
| t (min)   |                      |                   |           |             |                  |         |
| name      |                      |                   |           |             |                  |         |
| structure |                      |                   |           |             |                  |         |
| #         |                      |                   |           |             |                  |         |
| sample 1  |                      |                   |           |             |                  |         |
| sample 2  |                      |                   |           |             |                  |         |
| sample 3  |                      |                   |           |             |                  |         |

<sup>a</sup> Percentage in the table refers to the peak area percentage in GC-MS.

<sup>b</sup> Derived from washing of GC-MS.

# GC spectra

## (a) sample 1

C-RSA CHROMATOPAC CH=1 DATA=1:CHRM1.C00 ATTEN= 4 SPEED= 5.0

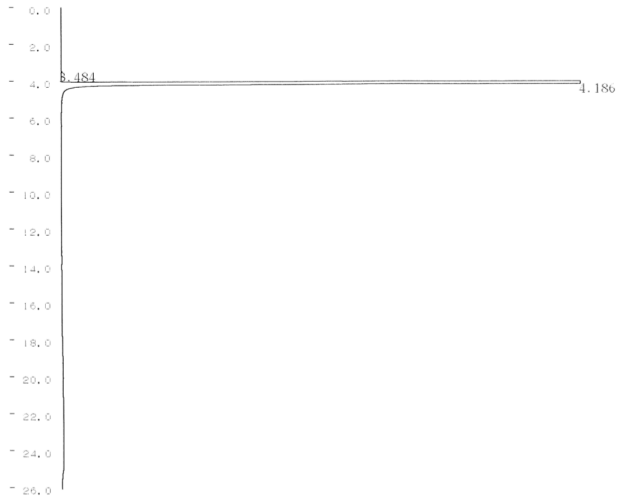

C-RSA CHROMATOPAC CH=1 Report No.=70 DATA=1:CHRM1.C00 17/09/29 08:50:30

\*\* CALCULATION REPORT \*\*

| CH    | PKNO | TIME  | AREA   | HEIGHT | MK | IDNO | CONC   | NAME |
|-------|------|-------|--------|--------|----|------|--------|------|
| 1     | 1    | 3.484 | 109    | 41     |    |      | 0.012  |      |
| 1     | 2    | 4.186 | 910963 | 197676 |    |      | 99.988 |      |
| TOTAL |      |       | 911072 | 197717 |    |      | 100    |      |

## (b) sample 2

C-RSA CHROMATOPAC CH=1 Report No.=72 DATA=1:CHRM1.C00 17/09/29 09:27:46

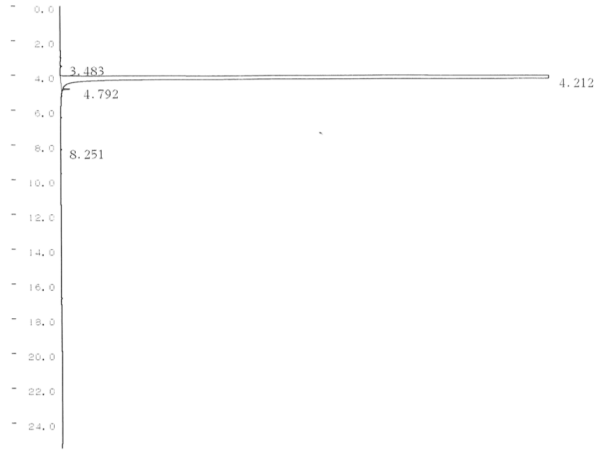

\*\* CALCULATION REPORT \*\*

| CH    | PKNO | TIME  | AREA    | HEIGHT | MK | IDNO | CONC    | NAME |
|-------|------|-------|---------|--------|----|------|---------|------|
| 1     | 2    | 3.483 | 180     | 60     |    |      | 0.012   |      |
| 1     | 3    | 4.212 | 1502166 | 255984 | S  |      | 99.9425 |      |
| 1     | 4    | 4.792 | 583     | 225    | T  |      | 0.0388  |      |
| 1     | 5    | 8.251 | 100     | 39     |    |      | 0.0067  |      |
| TOTAL |      |       | 1503030 | 256308 |    |      | 100     |      |

## (c) sample 3

C-RSA CHROMATOPAC CH=1 DATA=1:CHRM1.C00 ATTEN= 4 SPEED= 5.0

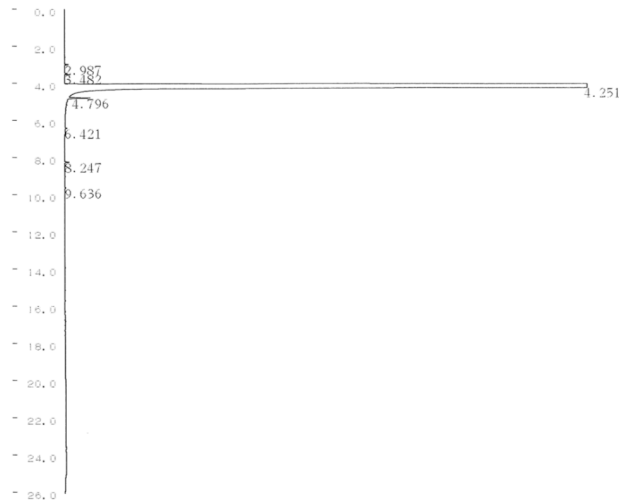

C-RSA CHROMATOPAC CH=1 Report No.=74 DATA=1:CHRM1.C00 17/09/29 10:36:20

\*\* CALCULATION REPORT \*\*

| CH    | PKNO | TIME  | AREA    | HEIGHT | MK | IDNO | CONC    | NAME |
|-------|------|-------|---------|--------|----|------|---------|------|
| 1     | 1    | 2.987 | 304     | 136    |    |      | 0.0129  |      |
| 1     | 2    | 3.482 | 287     | 90     |    |      | 0.0122  |      |
| 1     | 3    | 4.251 | 2344774 | 330156 | S  |      | 99.8784 |      |
| 1     | 4    | 4.796 | 1619    | 660    | T  |      | 0.069   |      |
| 1     | 5    | 6.421 | 211     | 76     |    |      | 0.009   |      |
| 1     | 6    | 8.247 | 332     | 134    |    |      | 0.0141  |      |
| 1     | 7    | 9.636 | 103     | 41     |    |      | 0.0044  |      |
| TOTAL |      |       | 2347629 | 331293 |    |      | 100     |      |

## GC-MS spectra

### (a) sample 1

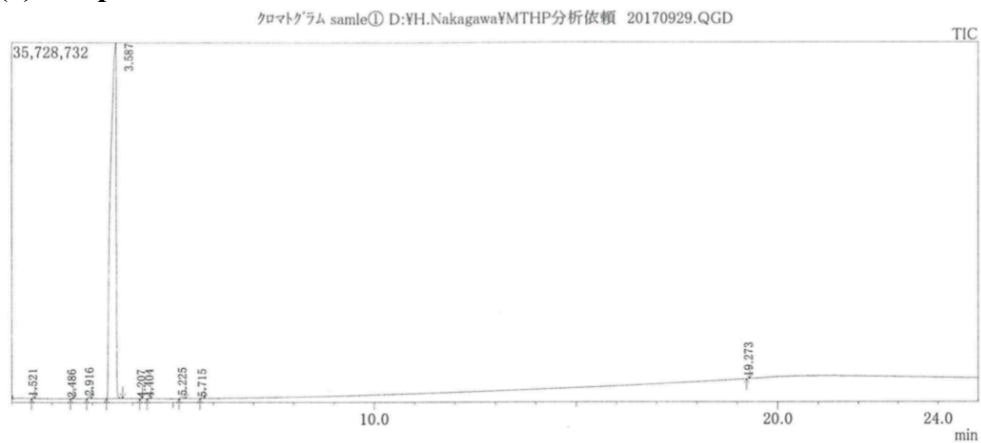

### (b) sample 2

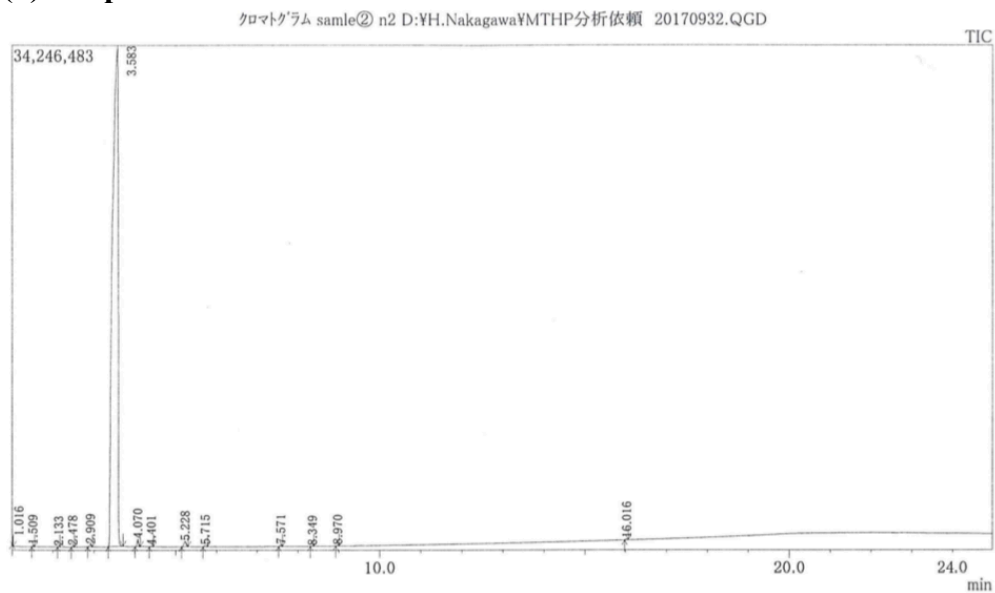

### (c) sample 3

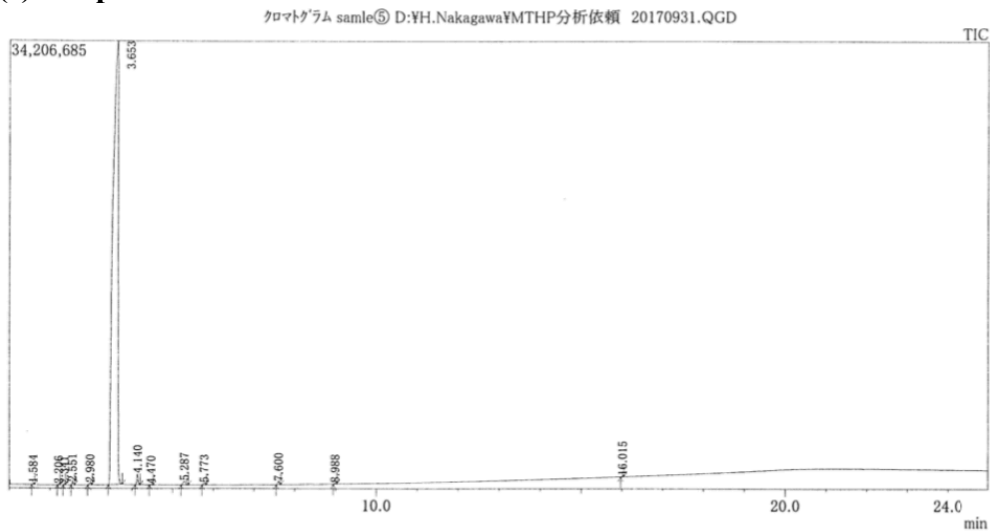

### 2.3. Radical addition in THP

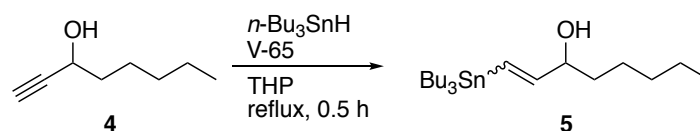

#### Experimental procedure

Commercially available THP (without stabilizer) was used for the reaction without any pretreatment (sample 4). Oct-1-yn-3-ol (**4**) (126 mg, 0.997 mmol), *n*-Bu<sub>3</sub>SnH (380 mg, 1.31 mmol), and V-65 (50.1 mg, 0.202 mmol) were placed in a 100 mL two-necked round bottom flask equipped with a reflux condenser. The flask was flushed with argon and THP (20 mL) was added. After complete dissolution of AIBN at room temperature, the solution was heated at reflux for 30 min. The solution was stood at room temperature and, after attachment of the distillation apparatus, the solvent was distilled under reduced pressure (bp 35-39 °C/17-21 kPa) (sample 5). The residual oil was purified by flash chromatography on silica gel (*n*-hexane/EtOAc/Et<sub>3</sub>N = 100/1/1) to give stannane **5** (325 mg, 0.779 mmol, 78%, *E/Z*=10:1) as a pale yellow oil. The purity of the recovered THP was determined to be 99.75% by the GC analysis. The same experiment was performed with the recovered THP, providing the product **5** (79% yield, *E/Z*=10:1) with a recovery of THP (purity: 99.77%) (sample 6).

#### Compound characterization list analyzed by GC-MS<sup>a</sup>

|                  |                      |           |                            |          |          |                         |
|------------------|----------------------|-----------|----------------------------|----------|----------|-------------------------|
| <b>t (min)</b>   | 2.1                  | 2.5       | 2.96                       | 3.03     | 3.5      | 4.4                     |
| <b>name</b>      | acetone <sup>b</sup> | 2-MeTHF   | THP                        | 2-MeTHP  | 3-MeTHP  | <i>n</i> -butyl formate |
| <b>structure</b> |                      |           |                            |          |          |                         |
| <b>#</b>         |                      |           |                            | <b>F</b> | <b>G</b> | <b>H</b>                |
| <b>sample 4</b>  | 0.64%                | 0.34%     | 93.60%                     | 1.67%    | 1.51%    | 0.46%                   |
| <b>sample 5</b>  | 0.07%                | 0.44%     | 94.89%                     | 1.56%    | 1.22%    | 0.44%                   |
| <b>sample 6</b>  | 0.02%                | 0.40%     | 96.07%                     | 1.20%    | 0.85%    | 0.28%                   |
| <b>t (min)</b>   | 5.2                  | 7.6       | 8.8                        | 14.4     | 15.6     | 18.2                    |
| <b>name</b>      | water                | 1-butanol | 2,4-dimethylpentanenitrile | unknown  | unknown  | δ-lactone               |
| <b>structure</b> | H <sub>2</sub> O     |           |                            |          |          |                         |
| <b>#</b>         | <b>B</b>             | <b>D</b>  | <b>I</b>                   |          |          |                         |
| <b>sample 4</b>  | 0.54%                | 0.16%     | 0.36%                      | 0.16%    | 0.36%    | 0.11%                   |
| <b>sample 5</b>  | 0.60%                | 0.05%     | 0.10%                      | -        | -        | -                       |
| <b>sample 6</b>  | 0.39%                | 0.05%     | 0.13%                      | -        | -        | -                       |
| <b>t (min)</b>   |                      |           |                            |          |          |                         |
| <b>name</b>      |                      |           |                            |          |          |                         |
| <b>structure</b> |                      |           |                            |          |          |                         |
| <b>#</b>         |                      |           |                            |          |          |                         |
| <b>sample 4</b>  |                      |           |                            |          |          |                         |
| <b>sample 5</b>  |                      |           |                            |          |          |                         |
| <b>sample 6</b>  |                      |           |                            |          |          |                         |

<sup>a</sup> Percentage in the table refers to the peak area percentage in GC-MS.

<sup>b</sup> Derived from washing of GC-MS.

# GC spectra

## (d) sample 4

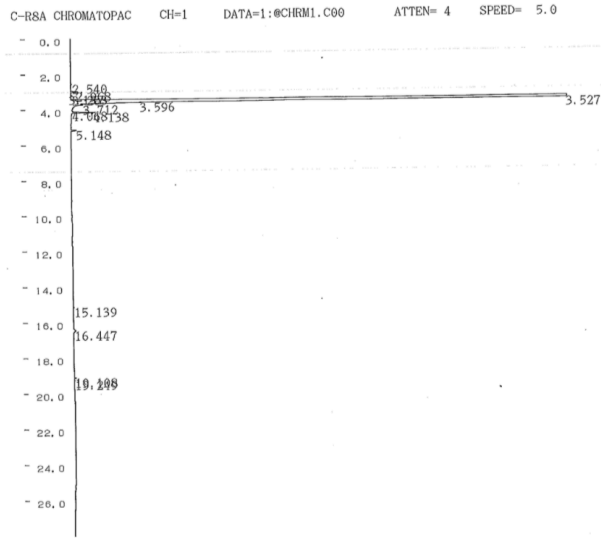

C-RSA CHROMATOPAC CH=1 Report No.=222 DATA=1:@CHRM1.C00 17/12/11 10:59:12

\*\* CALCULATION REPORT \*\*

| CH    | PKNO | TIME   | AREA    | HEIGHT | MK | IDNO | CONC    | NAME |
|-------|------|--------|---------|--------|----|------|---------|------|
| 1     | 1    | 2.54   | 106     | 50     |    |      | 0.0081  |      |
| 1     | 2    | 2.968  | 491     | 227    |    |      | 0.0376  |      |
| 1     | 3    | 3.137  | 33      | 14     |    |      | 0.0025  |      |
| 1     | 4    | 3.203  | 139     | 63     | V  |      | 0.0106  |      |
| 1     | 5    | 3.527  | 1301279 | 354011 | S  |      | 99.6302 |      |
| 1     | 6    | 3.596  | 530     | 393    | T  |      | 0.0406  |      |
| 1     | 7    | 3.712  | 257     | 137    | T  |      | 0.0197  |      |
| 1     | 8    | 4.068  | 86      | 40     | T  |      | 0.0065  |      |
| 1     | 9    | 4.138  | 1973    | 767    | TV |      | 0.1511  |      |
| 1     | 10   | 5.148  | 544     | 184    |    |      | 0.0417  |      |
| 1     | 11   | 15.139 | 72      | 33     |    |      | 0.0055  |      |
| 1     | 12   | 16.447 | 414     | 68     |    |      | 0.0317  |      |
| 1     | 13   | 19.108 | 148     | 64     |    |      | 0.0113  |      |
| 1     | 14   | 19.249 | 39      | 19     |    |      | 0.003   |      |
| TOTAL |      |        | 1306109 | 356069 |    |      | 100     |      |

## (e) sample 5

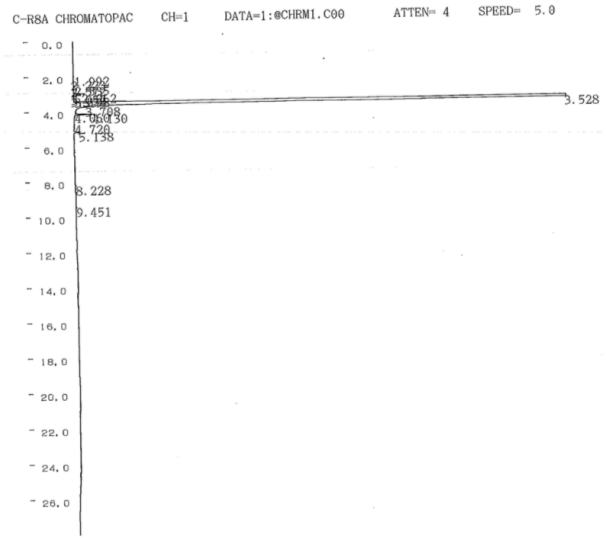

C-RSA CHROMATOPAC CH=1 Report No.=223 DATA=1:@CHRM1.C00 17/12/11 12:30:58

\*\* CALCULATION REPORT \*\*

| CH    | PKNO | TIME  | AREA    | HEIGHT | MK | IDNO | CONC    | NAME |
|-------|------|-------|---------|--------|----|------|---------|------|
| 1     | 1    | 1.992 | 37      | 29     |    |      | 0.0025  |      |
| 1     | 3    | 2.535 | 98      | 62     |    |      | 0.0067  |      |
| 1     | 4    | 2.572 | 27      | 17     | V  |      | 0.0019  |      |
| 1     | 5    | 2.962 | 700     | 365    | V  |      | 0.0484  |      |
| 1     | 6    | 3.052 | 25      | 13     | V  |      | 0.0017  |      |
| 1     | 7    | 3.138 | 28      | 13     | V  |      | 0.0019  |      |
| 1     | 8    | 3.198 | 67      | 35     | V  |      | 0.0046  |      |
| 1     | 9    | 3.528 | 1443828 | 377256 | S  |      | 99.7453 |      |
| 1     | 10   | 3.708 | 292     | 166    | T  |      | 0.0202  |      |
| 1     | 11   | 4.06  | 77      | 36     | T  |      | 0.0053  |      |
| 1     | 12   | 4.13  | 1594    | 658    | TV |      | 0.1101  |      |
| 1     | 13   | 4.72  | 36      | 15     |    |      | 0.0025  |      |
| 1     | 14   | 5.138 | 539     | 195    |    |      | 0.0372  |      |
| 1     | 15   | 5.228 | 56      | 24     |    |      | 0.0039  |      |
| 1     | 16   | 9.451 | 114     | 45     |    |      | 0.0078  |      |
| TOTAL |      |       | 1447516 | 378928 |    |      | 100     |      |

## (f) sample 6

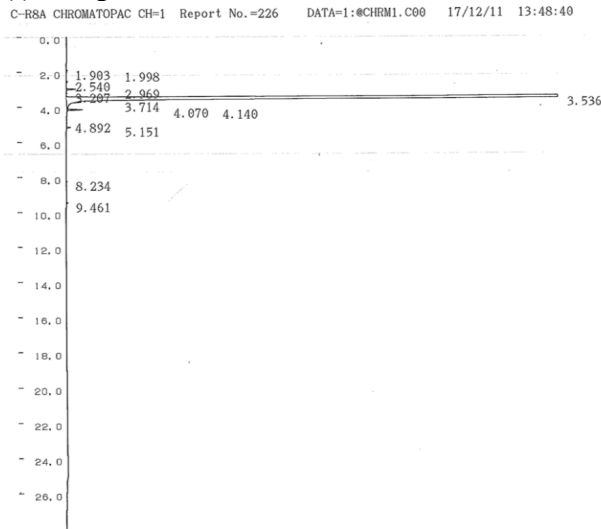

\*\* CALCULATION REPORT \*\*

| CH    | PKNO | TIME  | AREA    | HEIGHT | MK | IDNO | CONC    | NAME |
|-------|------|-------|---------|--------|----|------|---------|------|
| 1     | 1    | 1.903 | 81      | 42     |    |      | 0.0052  |      |
| 1     | 2    | 1.998 | 31      | 18     |    |      | 0.002   |      |
| 1     | 3    | 2.54  | 140     | 50     |    |      | 0.0091  |      |
| 1     | 4    | 2.969 | 743     | 304    |    |      | 0.0482  |      |
| 1     | 5    | 3.207 | 48      | 21     |    |      | 0.0031  |      |
| 1     | 6    | 3.536 | 1537225 | 389583 | S  |      | 99.7747 |      |
| 1     | 7    | 3.714 | 310     | 164    | T  |      | 0.0201  |      |
| 1     | 8    | 4.07  | 59      | 27     | T  |      | 0.0038  |      |
| 1     | 9    | 4.14  | 1297    | 491    | TV |      | 0.0842  |      |
| 1     | 10   | 4.892 | 40      | 15     |    |      | 0.0026  |      |
| 1     | 11   | 5.151 | 422     | 142    |    |      | 0.0274  |      |
| 1     | 12   | 8.234 | 100     | 41     |    |      | 0.0065  |      |
| 1     | 13   | 9.461 | 200     | 75     |    |      | 0.013   |      |
| TOTAL |      |       | 1540696 | 390972 |    |      | 100     |      |

# GC-MS spectra

## (d) sample 4

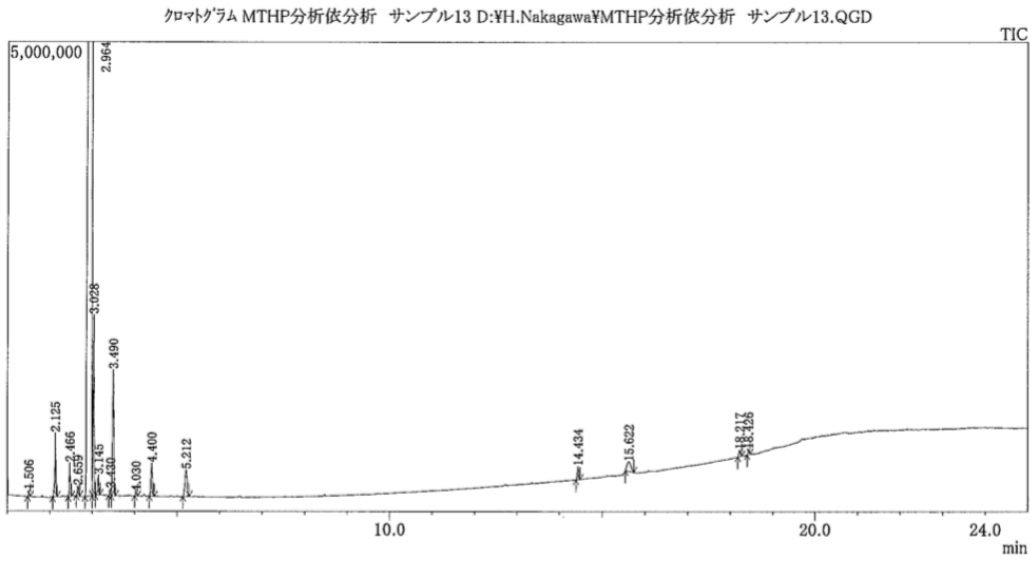

## (e) sample 5

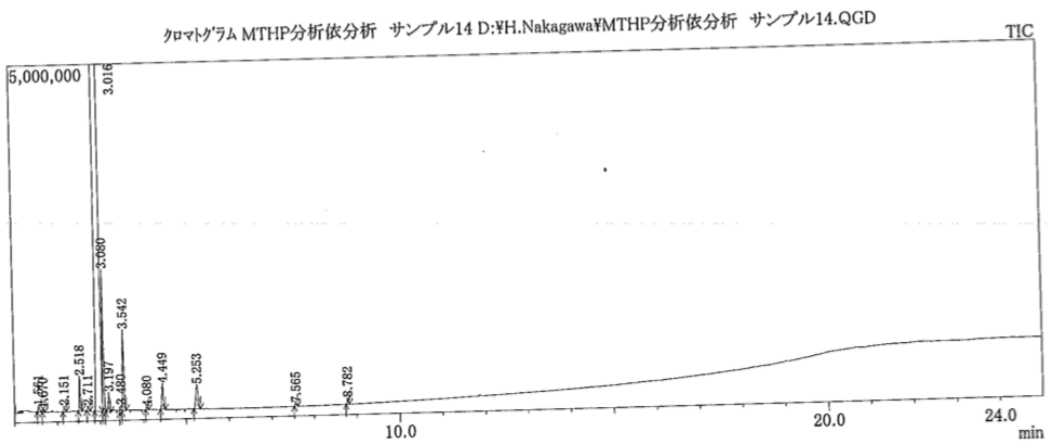

## (f) sample 6

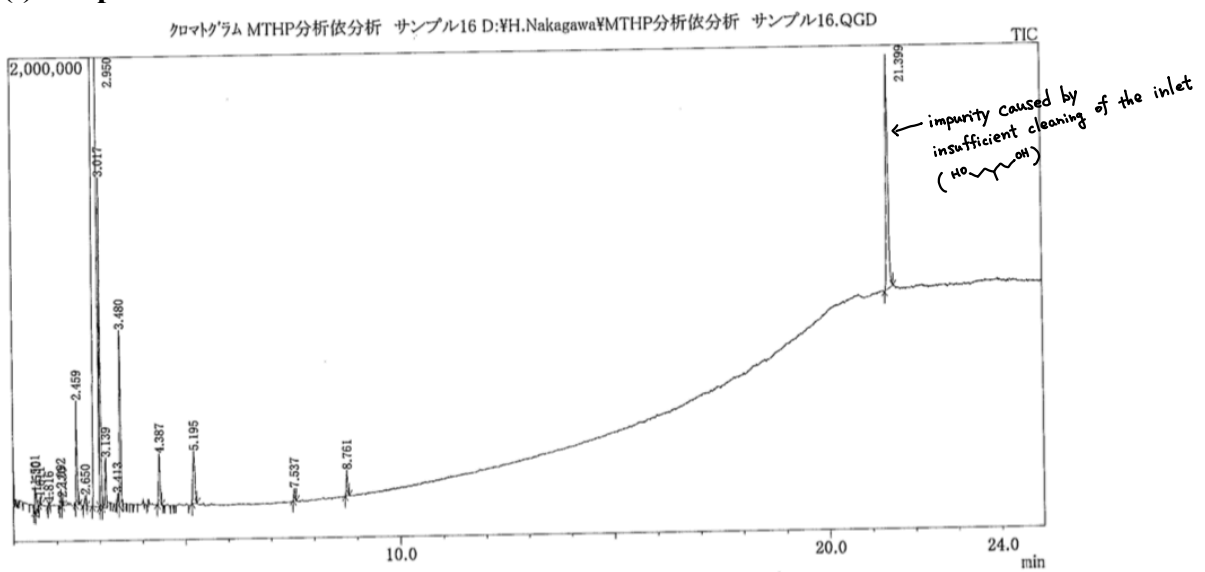

## 2.4. Radical addition in 2-MeTHF

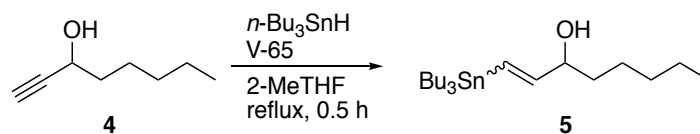

### Experimental procedure

Commercially available 2-MeTHF (stabilized with BHT) was stored with molecular sieves 4Å and used for the reaction (sample 7). Oct-1-yn-3-ol (**4**) (126 mg, 0.998 mmol), *n*-Bu<sub>3</sub>SnH (379 mg, 1.30 mmol), and V-65 (49.8 mg, 0.201 mmol) were placed in a 100 mL two-necked round bottom flask equipped with a reflux condenser. The flask was flushed with argon and 2-MeTHF (20 mL) was added. After complete dissolution of V-65 at room temperature, the solution was heated at reflux for 30 min. The solution was stood at room temperature and, after attachment of the distillation apparatus, the solvent was distilled under reduced pressure (bp 40-42 °C/25-28 kPa) (sample 8). The residual oil was purified by flash chromatography on silica gel (*n*-hexane/EtOAc/Et<sub>3</sub>N = 30/1/0.3) to give stannane **5** (324 mg, 0.821 mmol, 82%, *E/Z*=9:1) as a pale yellow oil. The purity of the recovered 2-MeTHF was determined to be 99.96% by the GC analysis. The same experiment was performed with the recovered 2-MeTHF, providing the product **5** (84% yield, *E/Z*=10:1) with a recovery of 2-MeTHF (purity: 99.59%) (sample 9).

### Compound characterization list analyzed by GC-MS<sup>a</sup>

|           |                  |                            |                                                           |                 |                       |
|-----------|------------------|----------------------------|-----------------------------------------------------------|-----------------|-----------------------|
| t (min)   | 2.5              | 3.2                        | 3.6                                                       | 4.2             | 4.6                   |
| name      | 2-MeTHF          | <i>sec</i> -butyl formate  | <i>n</i> -propyl acetate                                  | unknown         | 2-butanol             |
| structure |                  |                            |                                                           |                 |                       |
| #         |                  | <b>J</b>                   | <b>K</b>                                                  | <b>L</b>        | <b>M</b>              |
| sample 7  | 96.20%           | -                          | -                                                         | -               | 0.24%                 |
| sample 8  | 96.79%           | 0.11%                      | 0.33%                                                     | -               | 0.20%                 |
| sample 9  | 88.46%           | 1.55%                      | 3.28%                                                     | 0.09%           | 0.09%                 |
| t (min)   | 5.2              | 8.8                        | 13.5                                                      | 15.7            | 16.9                  |
| name      | water            | 2,4-dimethylpentanenitrile | 5-methyltetrahydrofuran-2-ol (+5-methyl-2,3-dihydrofuran) | γ-valerolactone | 5-hydroxypentan-2-one |
| structure | H <sub>2</sub> O |                            |                                                           |                 |                       |
| #         | <b>B</b>         | <b>I</b>                   | <b>N</b>                                                  | <b>O</b>        | <b>P</b>              |
| sample 7  | 1.10%            | -                          | -                                                         | -               | -                     |
| sample 8  | 1.43%            | 0.42%                      | 0.04%                                                     | 0.11%           | -                     |
| sample 9  | 0.66%            | 0.19%                      | 1.91%                                                     | 0.17%           | 2.84%                 |
| t (min)   | 19.3             | 21.4                       |                                                           |                 |                       |
| name      | BHT              |                            |                                                           |                 |                       |
| structure |                  |                            |                                                           |                 |                       |
| #         |                  |                            |                                                           |                 |                       |
| sample 7  | 1.40%            | 0.41%                      |                                                           |                 |                       |
| sample 8  | -                | -                          |                                                           |                 |                       |
| sample 9  | -                | -                          |                                                           |                 |                       |

<sup>a</sup> Percentage in the table refers to the peak area percentage in GC-MS.

# GC spectra

## (g) sample 7

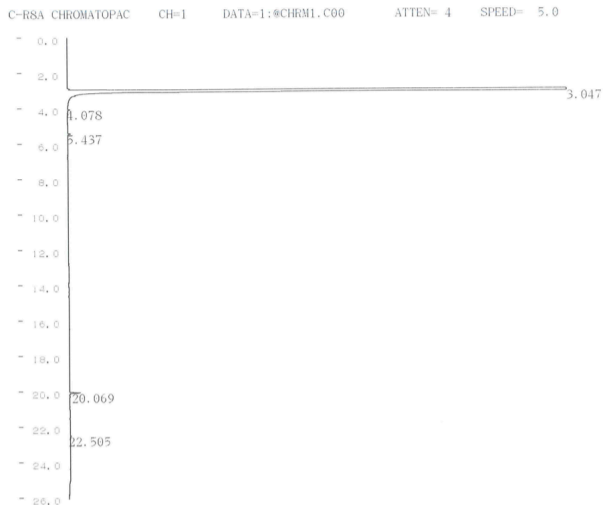

C-RSA CHROMATOPAC CH=1 Report No.=75 DATA=1:CHRM1.C00 17/09/29 11:17:58

\*\* CALCULATION REPORT \*\*

| CH PKNO | TIME   | AREA    | HEIGHT | MK | IDNO | CONC    | NAME |
|---------|--------|---------|--------|----|------|---------|------|
| 1       | 3.047  | 2147333 | 629114 |    |      | 99.9321 |      |
| 2       | 4.078  | 215     | 81     |    |      | 0.01    |      |
| 3       | 5.437  | 277     | 100    |    |      | 0.0129  |      |
| 4       | 20.069 | 867     | 351    |    |      | 0.0404  |      |
| 5       | 22.505 | 100     | 35     |    |      | 0.0047  |      |
| TOTAL   |        | 2148793 | 629681 |    |      | 100     |      |

## (h) sample 8

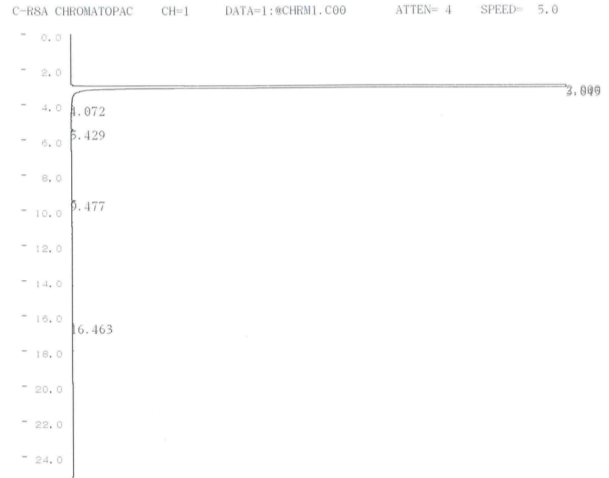

C-RSA CHROMATOPAC CH=1 Report No.=76 DATA=1:CHRM1.C00 17/09/29 12:16:10

\*\* CALCULATION REPORT \*\*

| CH PKNO | TIME  | AREA    | HEIGHT | MK | IDNO | CONC    | NAME |
|---------|-------|---------|--------|----|------|---------|------|
| 1       | 2.9   | 299     | 77     |    |      | 0.0132  |      |
| 2       | 3.045 | 2259035 | 661781 | V  |      | 99.9576 |      |
| 3       | 4.072 | 120     | 45     |    |      | 0.0053  |      |
| 4       | 5.429 | 203     | 74     |    |      | 0.009   |      |
| 5       | 9.477 | 337     | 123    |    |      | 0.0149  |      |
| TOTAL   |       | 2259994 | 662099 |    |      | 100     |      |

## (i) sample 9

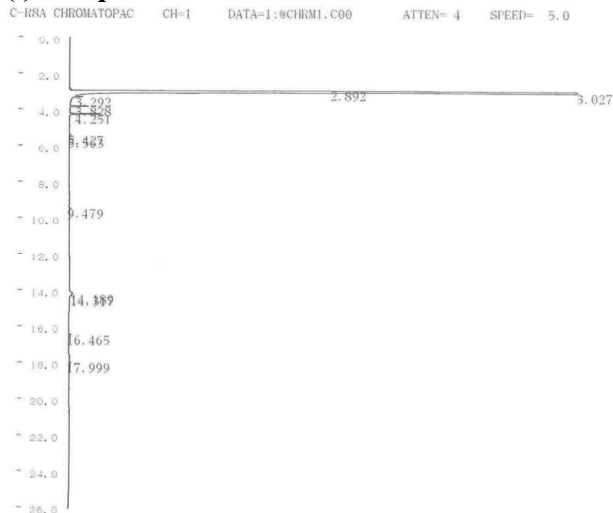

C-RSA CHROMATOPAC CH=1 Report No.=77 DATA=1:CHRM1.C00 17/09/29 12:50:40

\*\* CALCULATION REPORT \*\*

| CH PKNO | TIME   | AREA    | HEIGHT | MK | IDNO | CONC    | NAME |
|---------|--------|---------|--------|----|------|---------|------|
| 1       | 2.892  | 176     | 65     |    |      | 0.0114  |      |
| 2       | 3.027  | 1539656 | 528535 | SV |      | 99.5878 |      |
| 3       | 3.292  | 493     | 263    | T  |      | 0.0319  |      |
| 4       | 3.828  | 1338    | 579    |    |      | 0.0866  |      |
| 5       | 4.251  | 2471    | 976    |    |      | 0.1598  |      |
| 6       | 5.427  | 172     | 63     |    |      | 0.0111  |      |
| 8       | 9.479  | 148     | 55     |    |      | 0.0096  |      |
| 9       | 14.189 | 964     | 103    |    |      | 0.0624  |      |
| 10      | 14.317 | 256     | 79     | V  |      | 0.0166  |      |
| 11      | 16.465 | 190     | 80     |    |      | 0.0123  |      |
| 12      | 17.999 | 165     | 70     |    |      | 0.0106  |      |
| TOTAL   |        | 1546028 | 530866 |    |      | 100     |      |



## GC-MS spectra

### (g) sample 7

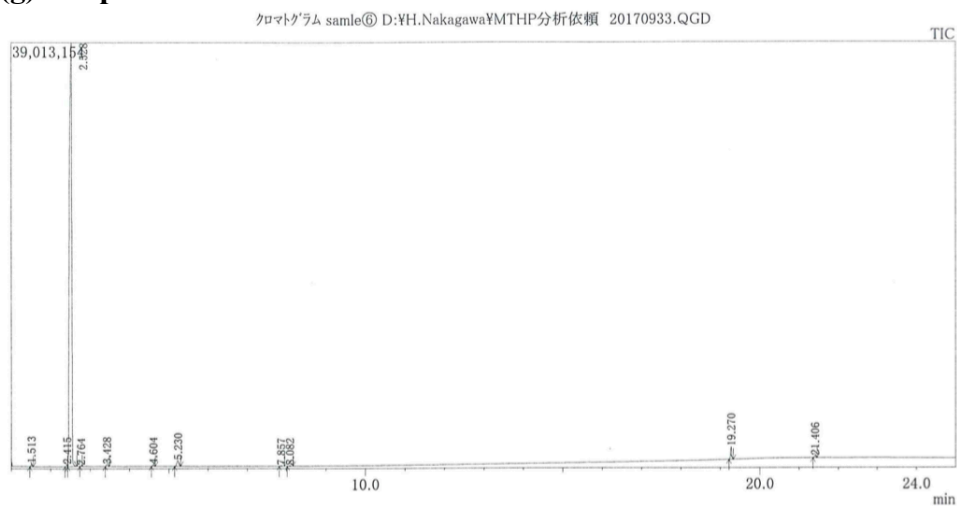

### (h) sample 8

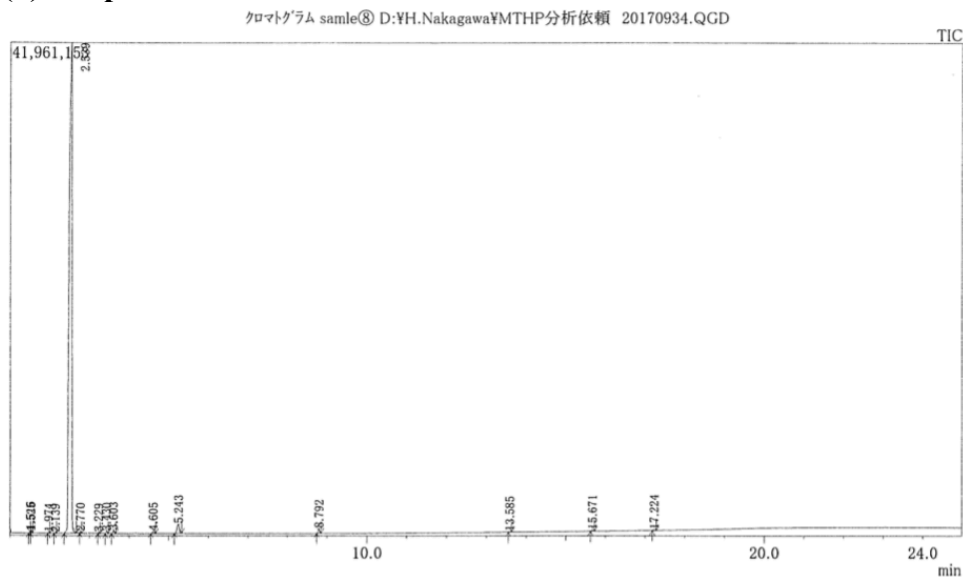

### (i) sample 9

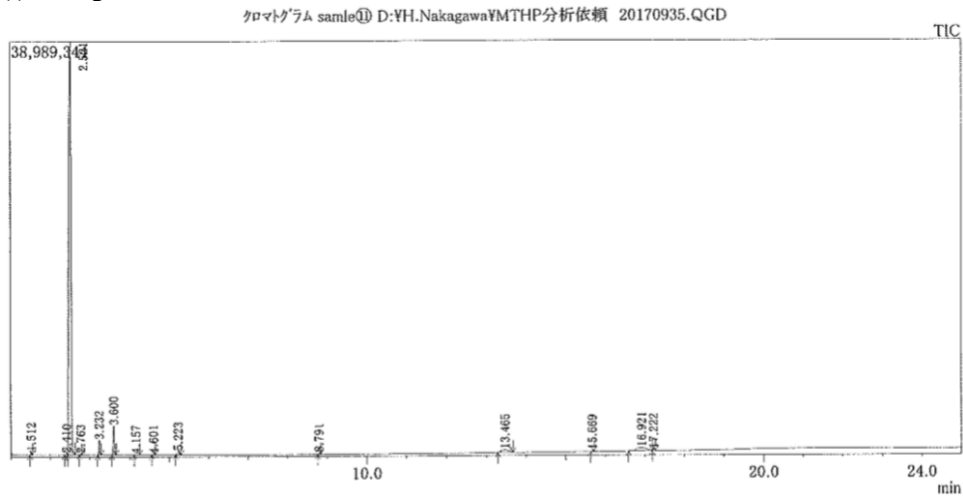

### **3. $^1\text{H}$ and $^{13}\text{C}$ NMR spectra of synthetic compounds**

|                        |            |                |                                                               |                        |                     |
|------------------------|------------|----------------|---------------------------------------------------------------|------------------------|---------------------|
| Acquisition Time (sec) | 3.5561     | Comment        | STANDARD 1H OBSERVE                                           | Date                   | Jul 6 2017          |
| Date Stamp             | Jul 6 2017 | File Name      | YYMacYiCloudY2017NMR KY2017NMR (agilent) YamuraTT17070602.fid | Frequency (MHz)        | 300.05              |
| Frequency (MHz)        | 300.05     | Nucleus        | 1H                                                            | Number of Transients   | 16                  |
| Points Count           | 65536      | Pulse Sequence | s2pul                                                         | Receiver Gain          | 28.00               |
| Spectrum Offset (Hz)   | 1698.4518  | Spectrum Type  | STANDARD                                                      | Sweep Width (Hz)       | 4603.07             |
|                        |            |                |                                                               | Solvent                | CHLOROFORM-d        |
|                        |            |                |                                                               | Temperature (degree C) | AMBIENT TEMPERATURE |

TT17070602

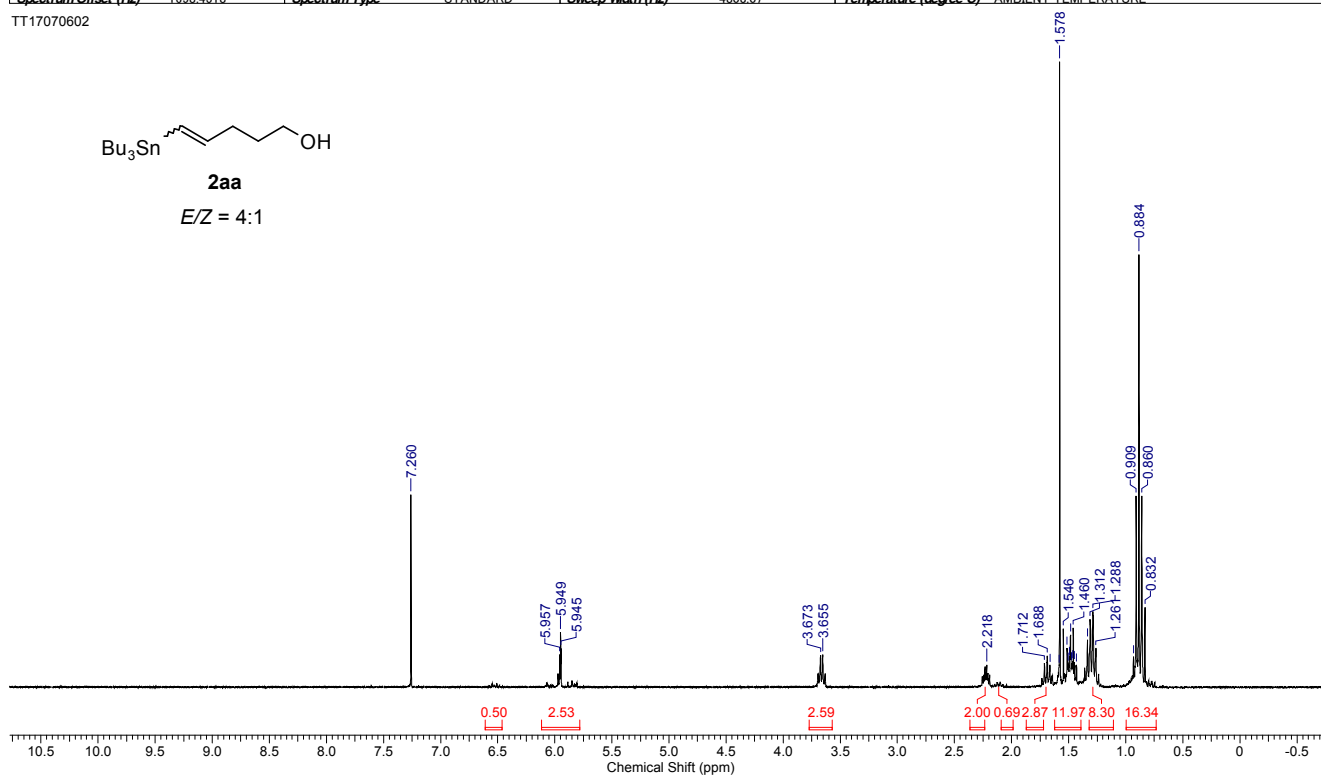

|                        |                                             |                       |           |               |             |                  |             |
|------------------------|---------------------------------------------|-----------------------|-----------|---------------|-------------|------------------|-------------|
| Acquisition Time (sec) | 0.8527                                      | Comment               | c13-NMR   | Date          | Mar 14 2019 | Date Stamp       | Mar 14 2019 |
| File Name              | YYMacYiCloudY2019NMR KYkobaSK19031401_C.fid | Frequency (MHz)       | 75.46     | Nucleus       | 13C         |                  |             |
| Number of Transients   | 128                                         | Original Points Count | 19335     | Points Count  | 65536       | Pulse Sequence   | s2pul       |
| Solvent                | CHLOROFORM-d                                | Spectrum Offset (Hz)  | 8956.2578 | Spectrum Type | STANDARD    | Receiver Gain    | 30.00       |
| Temperature (degree C) | AMBIENT TEMPERATURE                         |                       |           |               |             | Sweep Width (Hz) | 22675.74    |

SK19031401\_C

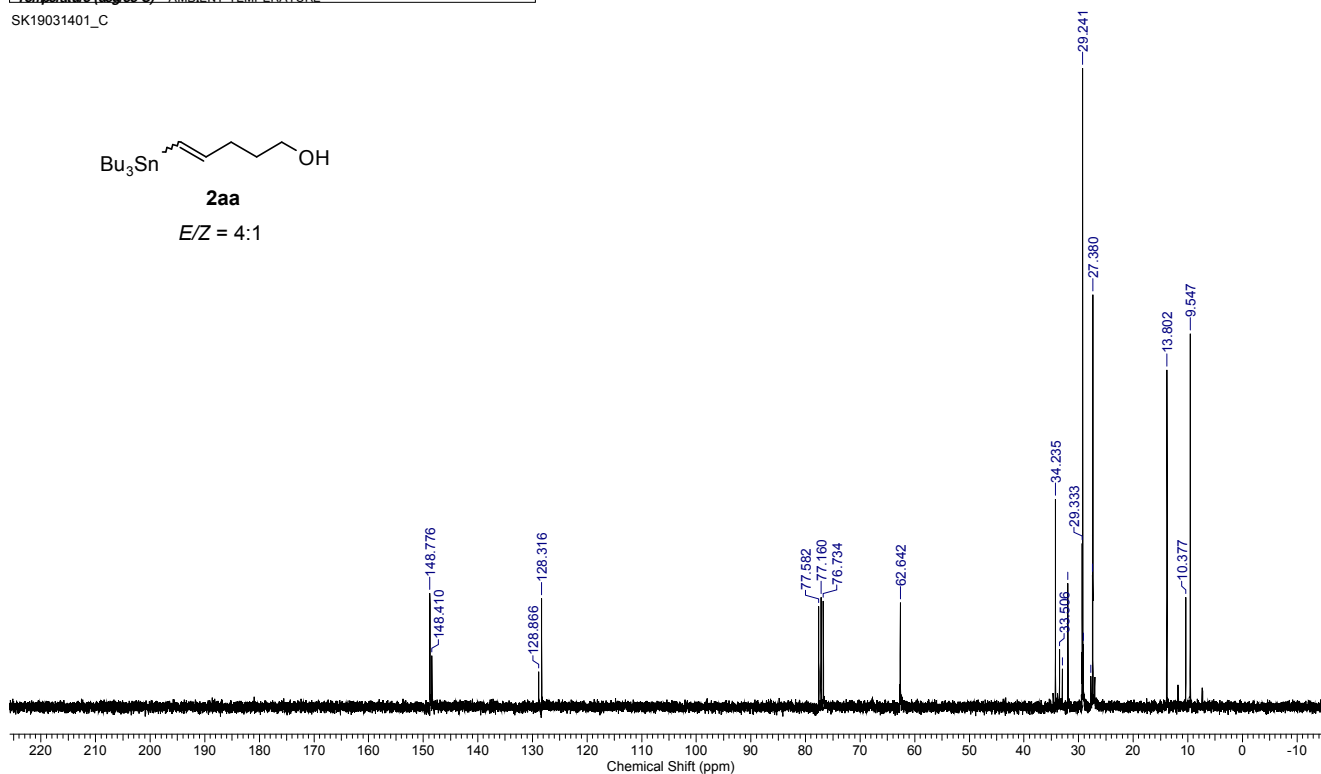

|                        |                                                                                    |                      |              |                        |                         |
|------------------------|------------------------------------------------------------------------------------|----------------------|--------------|------------------------|-------------------------|
| Acquisition Time (sec) | 2.1863                                                                             | Comment              | single_pulse | Date                   | 23. Jan. 2018. 12:28:31 |
| Date Stamp             | 23. Jan. 2018. 12:27:40                                                            |                      |              |                        |                         |
| File Name              | Y:\Mac\Cloud\Y\2018\2018012302\2017NMR KV2017NMR(JEOL)\Y\2018012302_Proton-1-1.jdf |                      |              | Frequency (MHz)        | 399.78                  |
| Nucleus                | <sup>1</sup> H                                                                     | Number of Transients | 8            | Origin                 | ECA                     |
| Owner                  | delta                                                                              | Points Count         | 32768        | Pulse Sequence         | proton.jxp              |
| Spectrum Offset (Hz)   | 2003.4902                                                                          | Sweep Width (Hz)     | 7494.00      | Temperature (degree C) | 18.400                  |
|                        |                                                                                    |                      |              | Solvent                | CHLOROFORM-d            |

TT18012302\_Proton-1-1.jdf

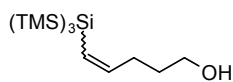**2ab***E/Z* = 1:3:2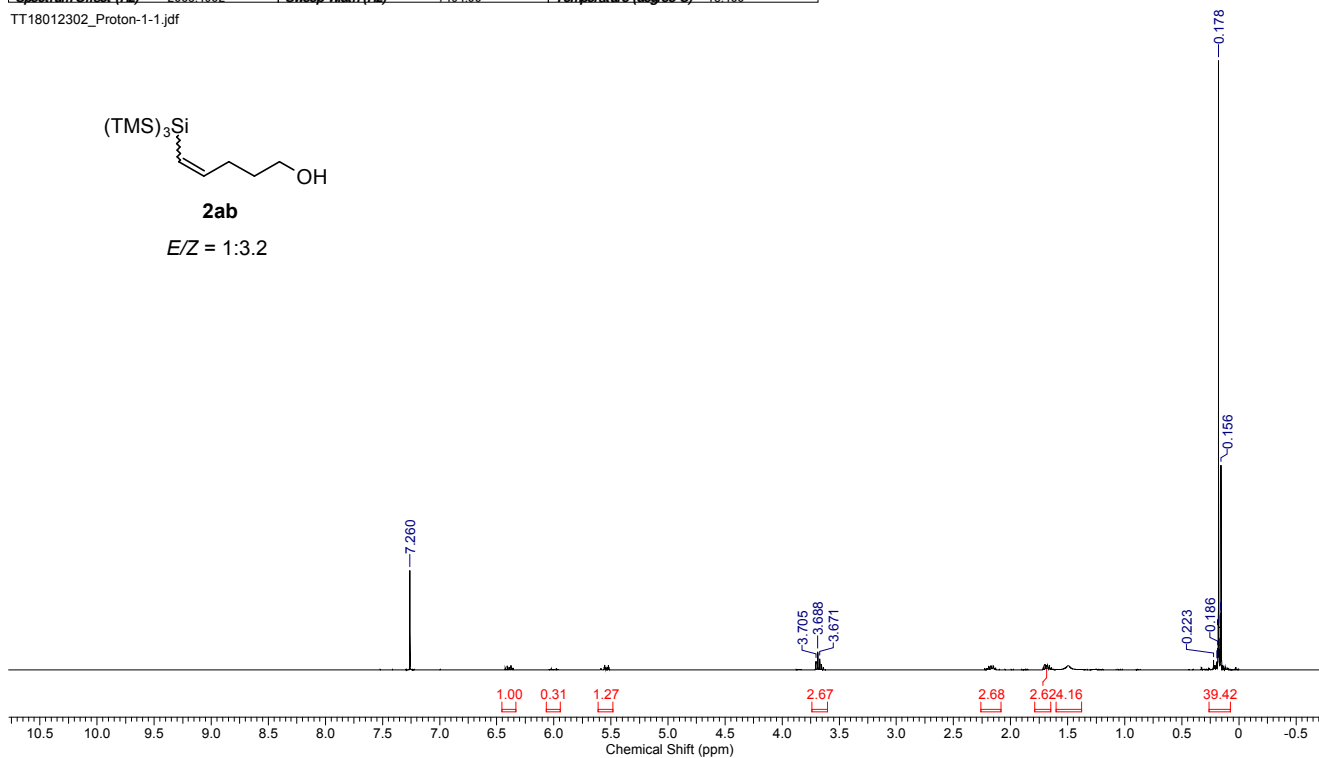

|                        |                                                                           |                       |         |                  |              |                  |              |
|------------------------|---------------------------------------------------------------------------|-----------------------|---------|------------------|--------------|------------------|--------------|
| Acquisition Time (sec) | 0.8527                                                                    | Comment               | c13-NMR | Date             | Mar. 12 2019 | Date Stamp       | Mar. 12 2019 |
| File Name              | Y:\Mac\Cloud\Y\2019\2019031202\2019NMR KV2019NMR(JEOL)\Y\2019031202_C.fid |                       |         | SK19031202_C.fid |              | Frequency (MHz)  | 75.46        |
| Number of Transients   | 128                                                                       | Original Points Count | 19335   | Points Count     | 65536        | Pulse Sequence   | s2pul        |
| Solvent                | CHLOROFORM-d                                                              |                       |         |                  | 8956.9492    | Spectrum Type    | STANDARD     |
| Temperature (degree C) | AMBIENT TEMPERATURE                                                       |                       |         |                  |              | Receiver Gain    | 30.00        |
|                        |                                                                           |                       |         |                  |              | Sweep Width (Hz) | 22675.74     |

SK19031202\_C

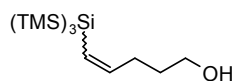**2ab***E/Z* = 1:3:2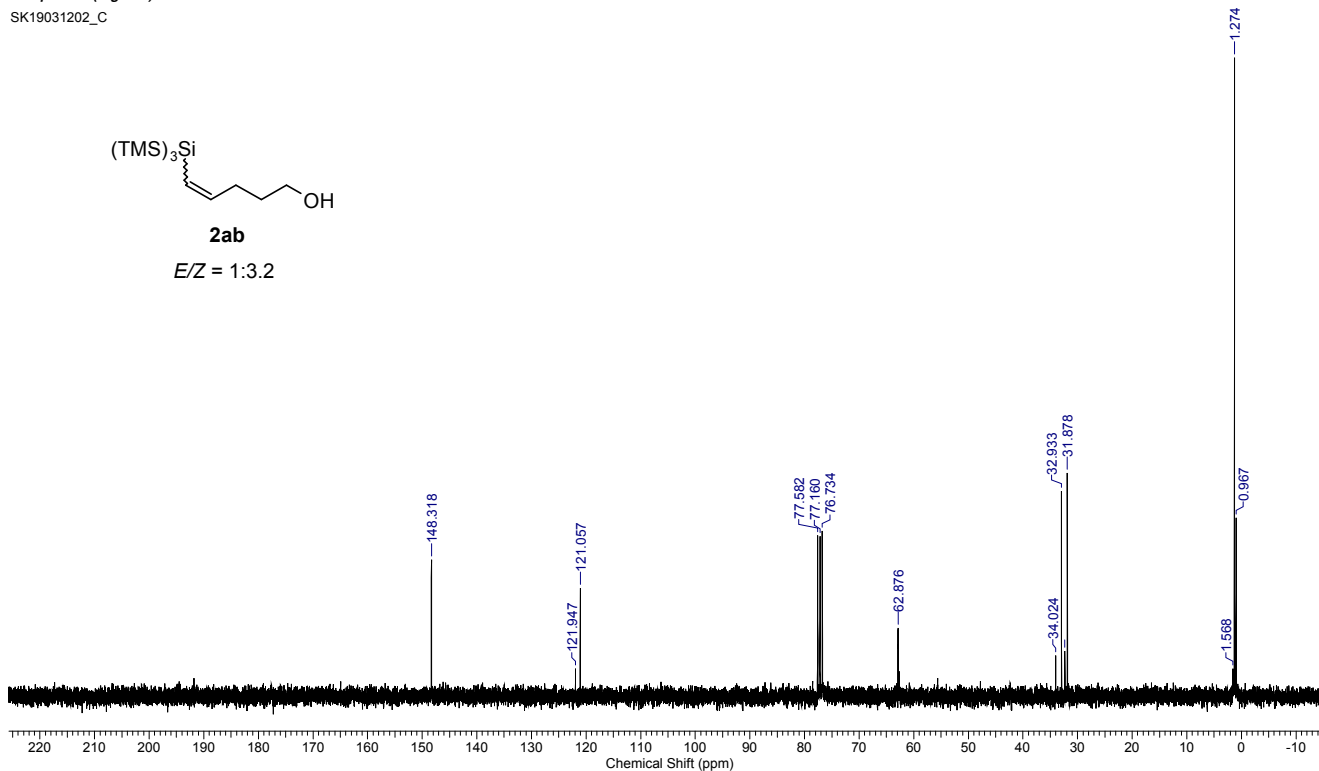

|                        |                                                                                |                      |              |                        |                      |                       |              |
|------------------------|--------------------------------------------------------------------------------|----------------------|--------------|------------------------|----------------------|-----------------------|--------------|
| Acquisition Time (sec) | 2.1863                                                                         | Comment              | single_pulse | Date                   | 13 Nov 2017 13:07:39 |                       |              |
| Date Stamp             | 13 Nov 2017 13:06:48                                                           |                      |              |                        |                      |                       |              |
| File Name              | \\YMac\Cloud\YMac\NMR\2017\NMR KV2017\NMR(JEOL)\YMac\TT17111301_Proton-1-1.jdf |                      |              |                        | Frequency (MHz)      | 399.78                |              |
| Nucleus                | <sup>1</sup> H                                                                 | Number of Transients | 8            | Origin                 | ECA                  | Original Points Count | 16384        |
| Owner                  | delta                                                                          | Points Count         | 32768        | Pulse Sequence         | protonjxp            | Solvent               | CHLOROFORM-d |
| Spectrum Offset (Hz)   | 2003.4905                                                                      | Sweep Width (Hz)     | 7494.00      | Temperature (degree C) | 17.900               |                       |              |

TT17111301\_Proton-1-1.jdf

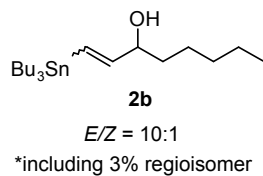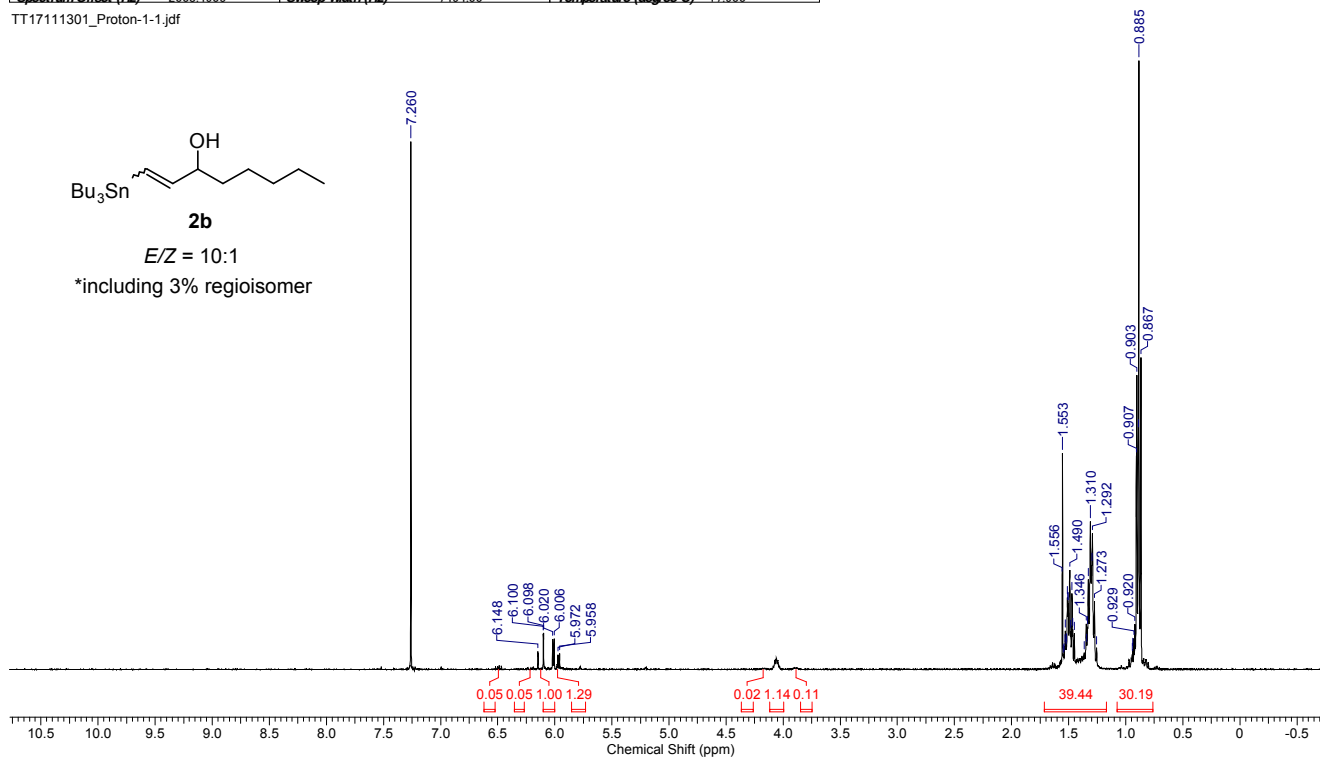

|                        |                                                            |                       |                      |              |                 |                |                  |                 |       |
|------------------------|------------------------------------------------------------|-----------------------|----------------------|--------------|-----------------|----------------|------------------|-----------------|-------|
| Acquisition Time (sec) | 0.8527                                                     | Comment               | c13-NMR              | Date         | Mar 12 2019     | Date Stamp     | Mar 12 2019      |                 |       |
| File Name              | \\YMac\Cloud\YMac\NMR\2019\NMR KV2019\SK19031203_C.fid\fid |                       |                      |              | Frequency (MHz) | 75.46          | Nucleus          | <sup>13</sup> C |       |
| Number of Transients   | 128                                                        | Original Points Count | 19335                | Points Count | 65536           | Pulse Sequence | s2pul            | Receiver Gain   | 30.00 |
| Solvent                | CHLOROFORM-d                                               |                       | Spectrum Offset (Hz) | 8956.9492    | Spectrum Type   | STANDARD       | Sweep Width (Hz) | 22675.74        |       |
| Temperature (degree C) | AMBIENT TEMPERATURE                                        |                       |                      |              |                 |                |                  |                 |       |

SK19031203\_C

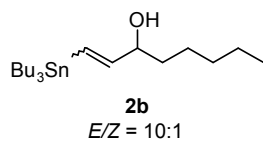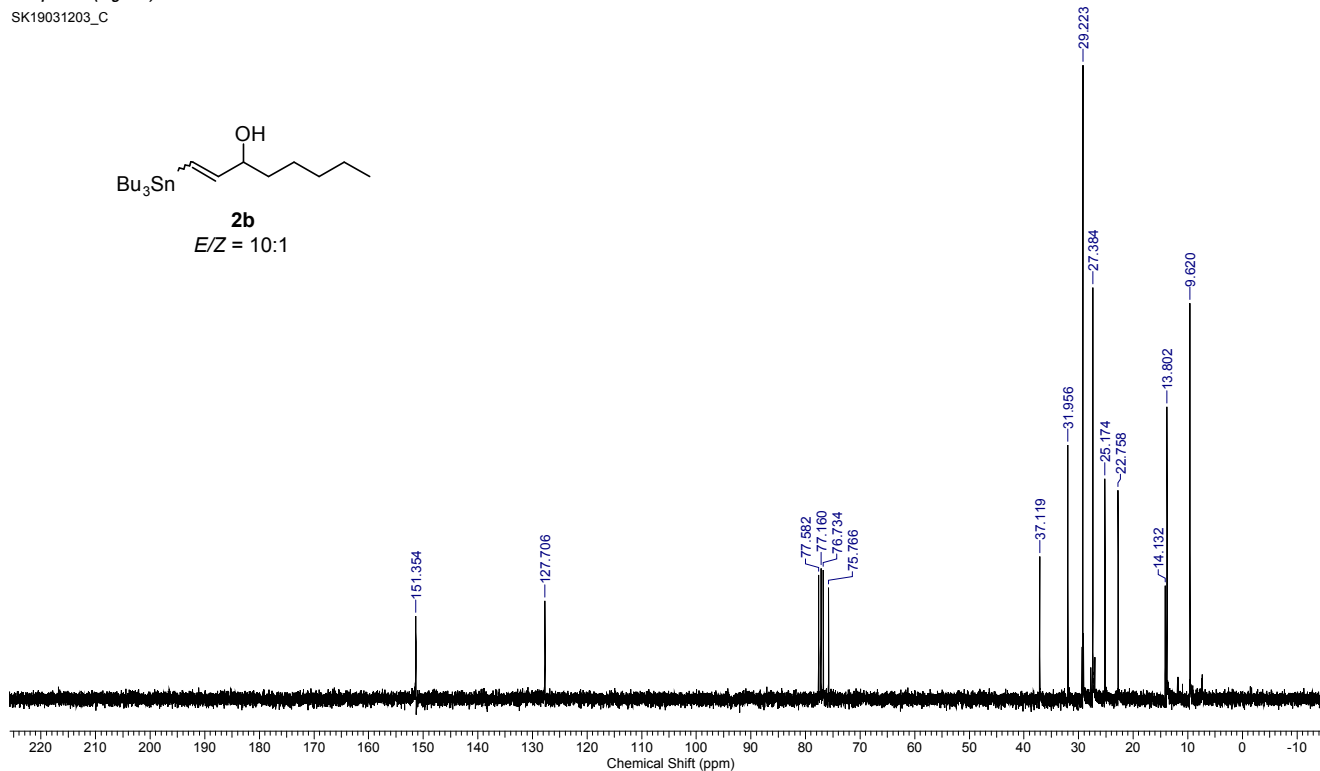

|                        |                                                                   |                      |              |                        |                       |
|------------------------|-------------------------------------------------------------------|----------------------|--------------|------------------------|-----------------------|
| Acquisition Time (sec) | 2.1863                                                            | Comment              | single_pulse | Date                   | 16. Jan 2018 07:48:07 |
| Date Stamp             | 16. Jan 2018 07:47:16                                             |                      |              |                        |                       |
| File Name              | Y:\Mac\Cloud\2017\NMR\2017NMR(KJEOL)\实验\TT18011601_Proton-1-1.jdf |                      |              | Frequency (MHz)        | 399.78                |
| Nucleus                | <sup>1</sup> H                                                    | Number of Transients | 8            | Origin                 | FCA                   |
| Owner                  | delta                                                             | Points Count         | 32768        | Pulse Sequence         | proton.jxp            |
| Spectrum Offset (Hz)   | 2003.4905                                                         | Sweep Width (Hz)     | 7494.00      | Temperature (degree C) | 16.500                |
|                        |                                                                   |                      |              | Solvent                | CHLOROFORM-d          |

TT18011601\_Proton-1-1.jdf

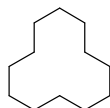

2c

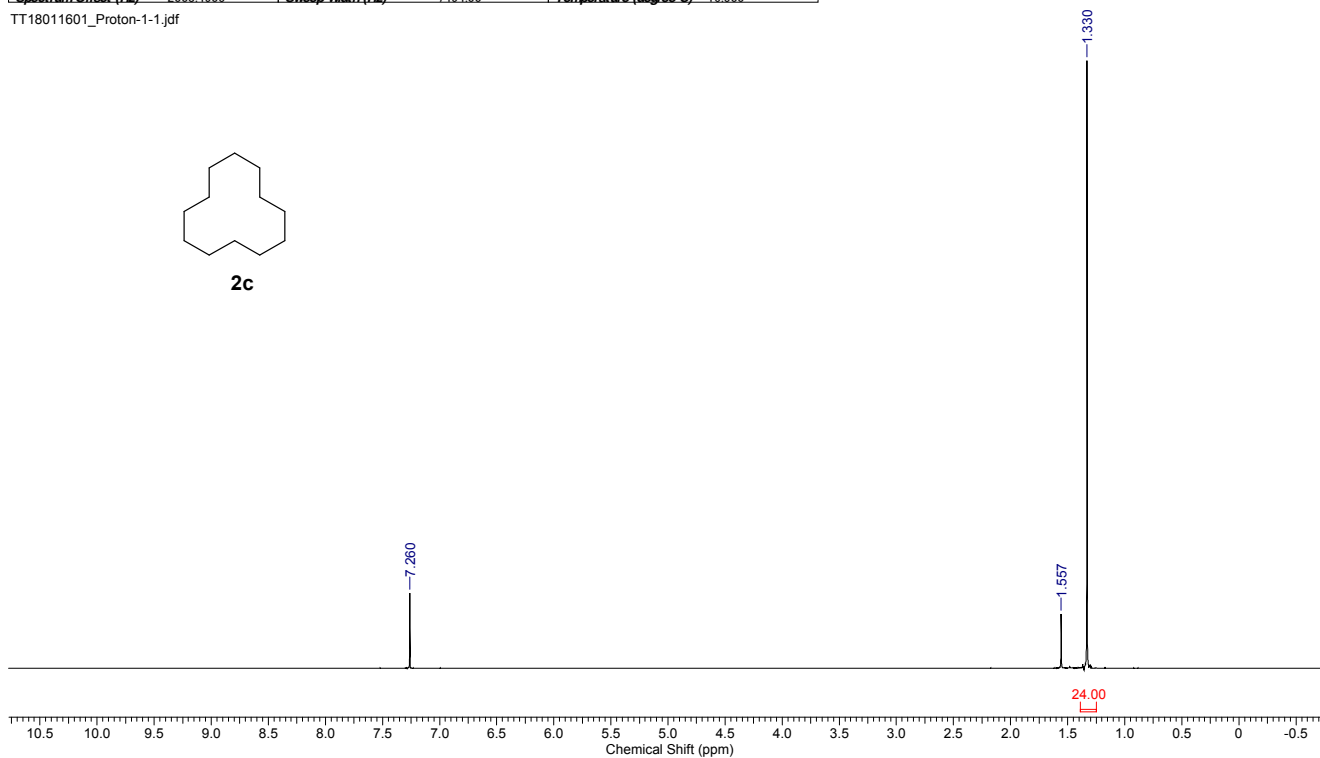

|                        |                                                                    |                      |          |                        |                     |                      |             |
|------------------------|--------------------------------------------------------------------|----------------------|----------|------------------------|---------------------|----------------------|-------------|
| Acquisition Time (sec) | 0.8527                                                             | Comment              | c13-NMR  | Date                   | May 28 2019         | Date Stamp           | May 28 2019 |
| File Name              | Y:\Mac\Cloud\2019\NMR\2019NMR(casilent)\Ykoba\SK19052801_C.fid\Fid |                      |          |                        |                     | Frequency (MHz)      | 75.46       |
| Nucleus                | <sup>13</sup> C                                                    | Number of Transients | 32       | Original Points Count  | 19335               | Points Count         | 65536       |
| Pulse Sequence         | s2pul                                                              | Receiver Gain        | 30.00    | Solvent                | CHLOROFORM-d        | Spectrum Offset (Hz) | 8957.2949   |
| Spectrum Type          | STANDARD                                                           | Sweep Width (Hz)     | 22675.74 | Temperature (degree C) | AMBIENT TEMPERATURE |                      |             |

2c-C(SK19052801\_C).esp

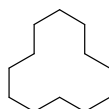

2c

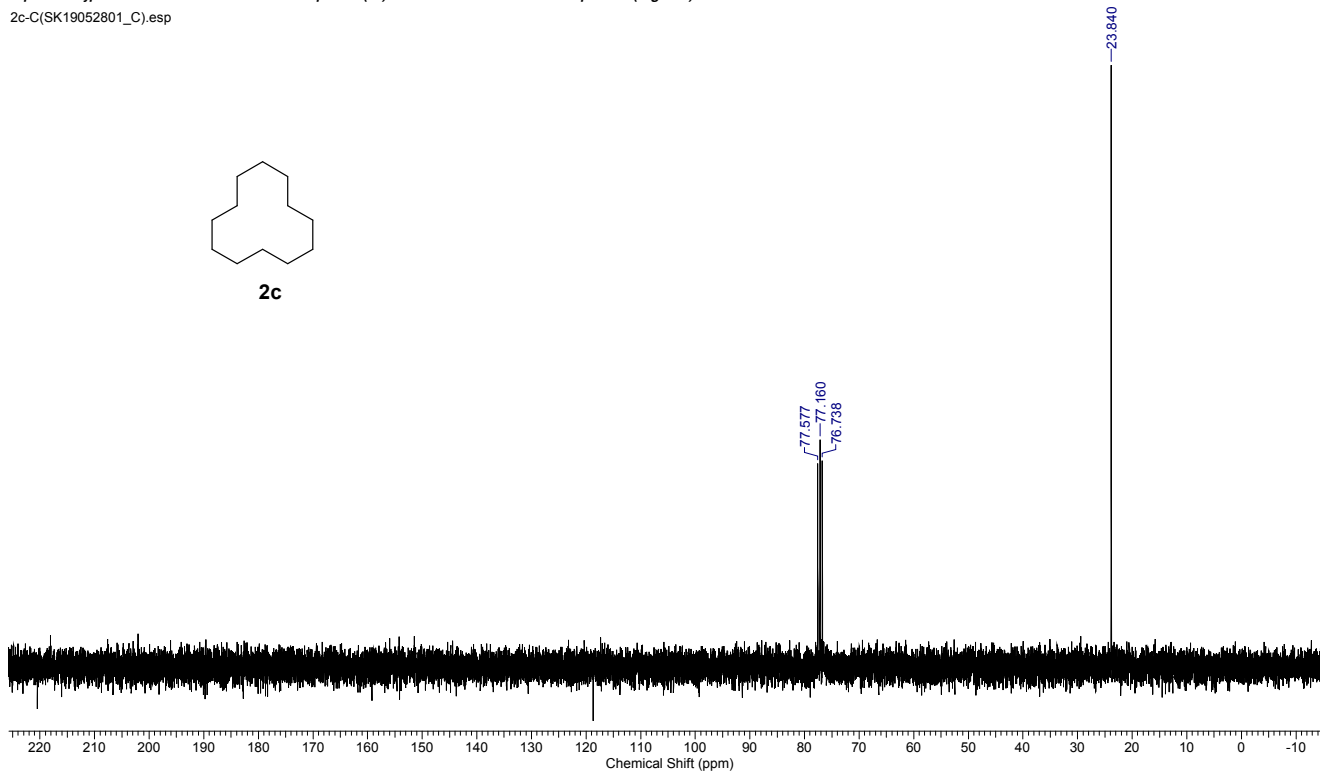

|                        |                                                         |                      |              |                        |                         |
|------------------------|---------------------------------------------------------|----------------------|--------------|------------------------|-------------------------|
| Acquisition Time (sec) | 2.1863                                                  | Comment              | single_pulse | Date                   | 17. Jan. 2018. 10:40:49 |
| Date Stamp             | 17. Jan. 2018. 10:39:58                                 |                      |              |                        |                         |
| File Name              | YYMac\Cloud\2018\20180117\NMR\2018011701\Proton-1-1.jdf |                      |              | Frequency (MHz)        | 399.78                  |
| Nucleus                | <sup>1</sup> H                                          | Number of Transients | 8            | Origin                 | FCA                     |
| Owner                  | delta                                                   | Points Count         | 32768        | Pulse Sequence         | proton.jxp              |
| Spectrum Offset (Hz)   | 2003.4905                                               | Sweep Width (Hz)     | 7494.00      | Temperature (degree C) | 20.800                  |
|                        |                                                         |                      |              | Solvent                | CHLOROFORM-d            |

TT18011701\_Proton-1-1.jdf

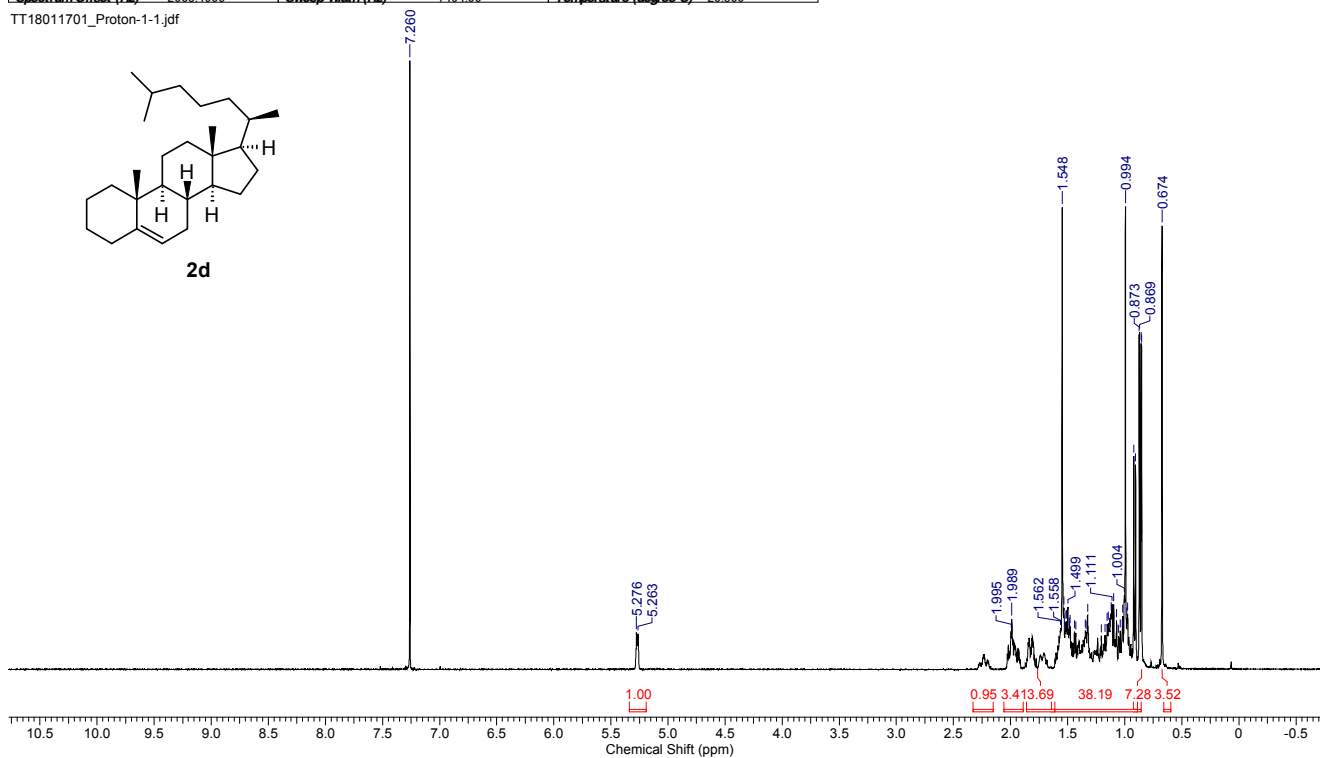

|                        |                                                    |                      |         |                       |               |                      |               |
|------------------------|----------------------------------------------------|----------------------|---------|-----------------------|---------------|----------------------|---------------|
| Acquisition Time (sec) | 0.8527                                             | Comment              | c13-NMR | Date                  | Mar. 14. 2019 | Date Stamp           | Mar. 14. 2019 |
| File Name              | YYMac\Cloud\2019\20190314\NMR\2019031402_C.fid\fid |                      |         | SK19031402_C.fid\fid  |               | Frequency (MHz)      | 75.46         |
| Nucleus                | <sup>13</sup> C                                    | Number of Transients | 128     | Original Points Count | 19335         | Points Count         | 65536         |
| Owner                  | delta                                              |                      |         |                       |               | Pulse Sequence       | s2pul         |
| Solvent                | CHLOROFORM-d                                       |                      |         |                       |               | Receiver Gain        | 30.00         |
| Temperature (degree C) | AMBIENT TEMPERATURE                                |                      |         |                       |               | Spectrum Offset (Hz) | 8957.2949     |
|                        |                                                    |                      |         |                       |               | Spectrum Type        | STANDARD      |
|                        |                                                    |                      |         |                       |               | Sweep Width (Hz)     | 22675.74      |

SK19031402\_C

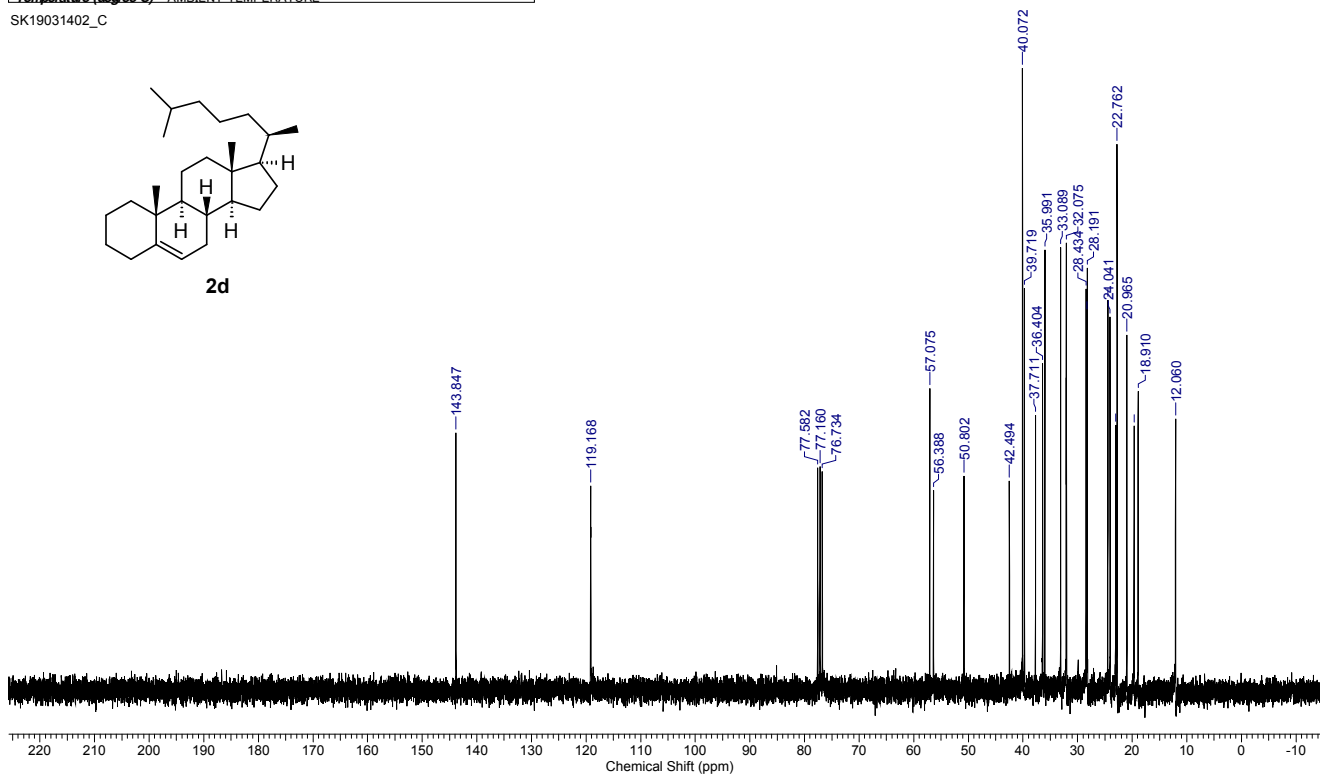

|                        |             |                |                                                               |                        |                     |
|------------------------|-------------|----------------|---------------------------------------------------------------|------------------------|---------------------|
| Acquisition Time (sec) | 3.5561      | Comment        | STANDARD 1H OBSERVE                                           | Date                   | Jun 27 2019         |
| Date Stamp             | Jun 27 2019 | File Name      | YYMac\CloudY\2019NMR\KY2019NMR\agilent\Ykuroda\YK19062701.fid | Frequency (MHz)        | 300.05              |
| Frequency (MHz)        | 300.05      | Nucleus        | 1H                                                            | Number of Transients   | 16                  |
| Points Count           | 65536       | Pulse Sequence | s2pul                                                         | Receiver Gain          | 28.00               |
| Spectrum Offset (Hz)   | 1698.7449   | Spectrum Type  | STANDARD                                                      | Sweep Width (Hz)       | 4803.07             |
|                        |             |                |                                                               | Solvent                | CHLOROFORM-d        |
|                        |             |                |                                                               | Temperature (degree C) | AMBIENT TEMPERATURE |

YK19062701

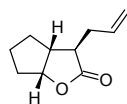

2e

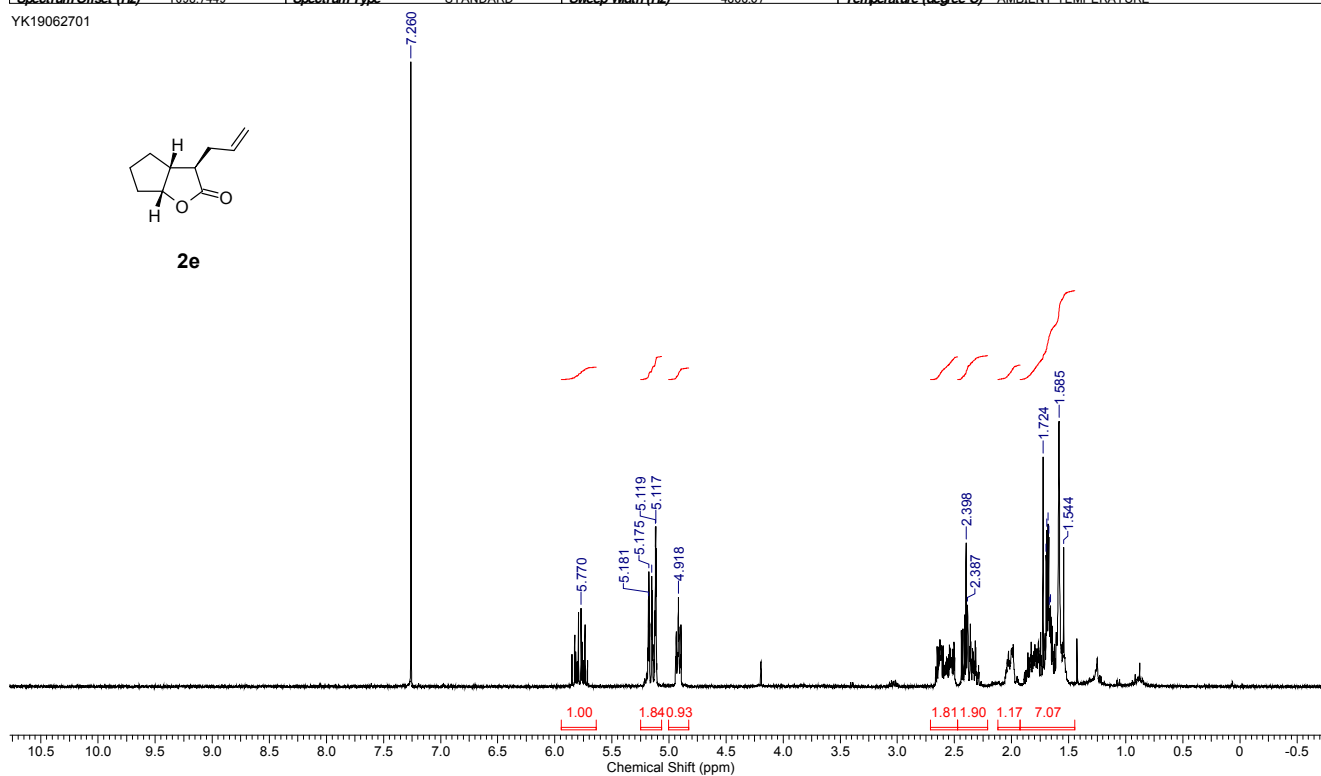

|                        |             |                |                                                                 |                        |                     |
|------------------------|-------------|----------------|-----------------------------------------------------------------|------------------------|---------------------|
| Acquisition Time (sec) | 0.8527      | Comment        | c13-NMR                                                         | Date                   | Jun 27 2019         |
| Date Stamp             | Jun 27 2019 | File Name      | YYMac\CloudY\2019NMR\KY2019NMR\agilent\Ykuroda\YK19062701_C.fid | Frequency (MHz)        | 75.46               |
| Frequency (MHz)        | 75.46       | Nucleus        | 13C                                                             | Number of Transients   | 1024                |
| Points Count           | 65536       | Pulse Sequence | s2pul                                                           | Receiver Gain          | 30.00               |
| Spectrum Offset (Hz)   | 8957.2959   | Spectrum Type  | STANDARD                                                        | Sweep Width (Hz)       | 22675.74            |
|                        |             |                |                                                                 | Solvent                | CHLOROFORM-d        |
|                        |             |                |                                                                 | Temperature (degree C) | AMBIENT TEMPERATURE |

YK19062701\_C

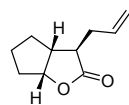

2e

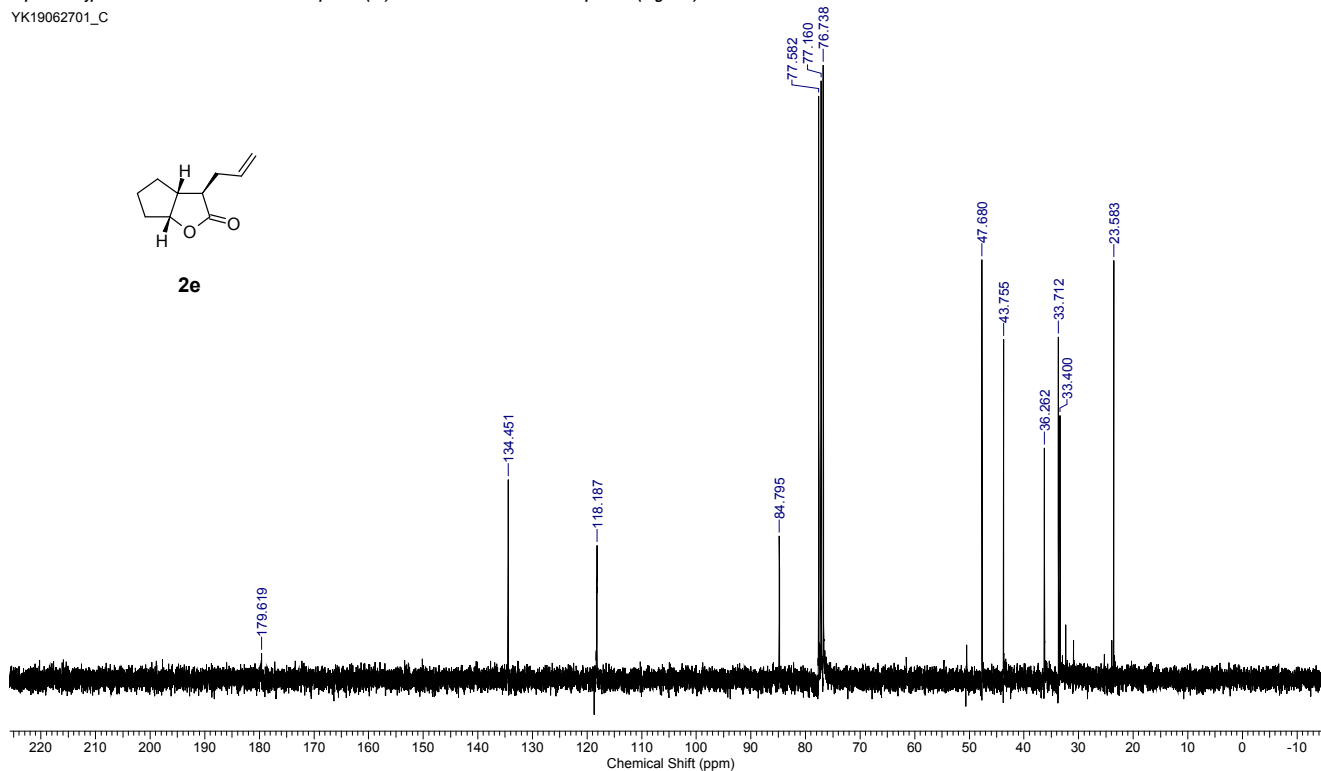



|                        |             |                |                                                                            |                        |                     |
|------------------------|-------------|----------------|----------------------------------------------------------------------------|------------------------|---------------------|
| Acquisition Time (sec) | 3.5561      | Comment        | STANDARD 1H OBSERVE                                                        | Date                   | May 25 2019         |
| Date Stamp             | May 25 2019 | File Name      | YYMac\Cloud\YK19052506\2019NMR\KY2019NMR(agilent)\Ykoba\YK19052506.fid\fid |                        |                     |
| Frequency (MHz)        | 300.05      | Nucleus        | 1H                                                                         | Number of Transients   | 16                  |
| Points Count           | 65536       | Pulse Sequence | s2pul                                                                      | Receiver Gain          | 30.00               |
| Spectrum Offset (Hz)   | 1698.7450   | Spectrum Type  | STANDARD                                                                   | Sweep Width (Hz)       | 4803.07             |
|                        |             |                |                                                                            | Solvent                | CHLOROFORM-d        |
|                        |             |                |                                                                            | Temperature (degree C) | AMBIENT TEMPERATURE |

SK19052506

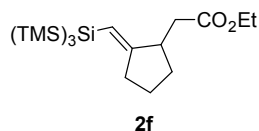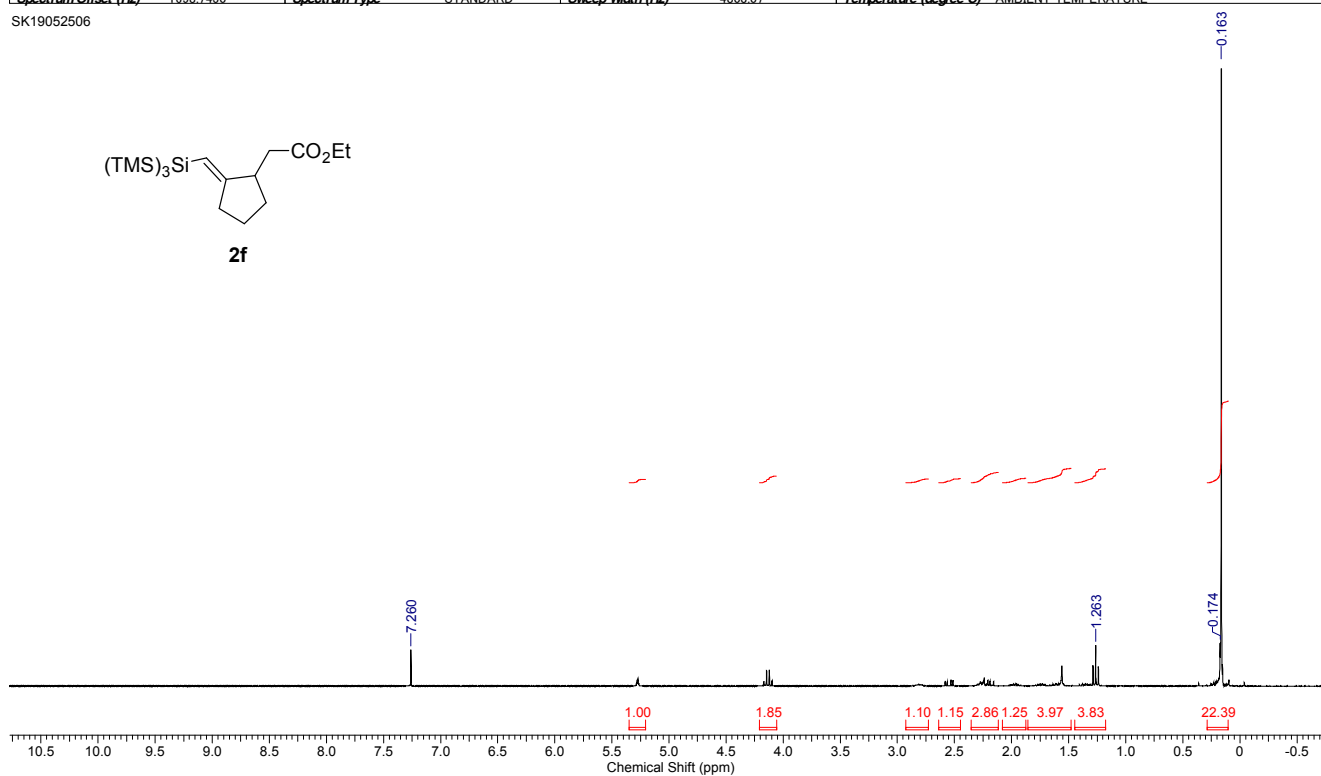

|                        |                                                                                  |                      |                                  |                        |                      |
|------------------------|----------------------------------------------------------------------------------|----------------------|----------------------------------|------------------------|----------------------|
| Acquisition Time (sec) | 1.0381                                                                           | Comment              | single pulse decoupled gated NOE | Date                   | 26 Apr 2019 13:16:47 |
| Date Stamp             | 26 Apr 2019 12:37:16                                                             |                      |                                  |                        |                      |
| File Name              | YYMac\Cloud\YK19052506\2019NMR\JEOL\YK19052506\2019NMR\TT19042601_Carbon-1-1.jdf |                      |                                  |                        |                      |
| Frequency (MHz)        | 100.53                                                                           | Nucleus              | 13C                              | Number of Transients   | 1024                 |
| Original Points Count  | 32768                                                                            | Owner                | delta                            | Points Count           | 65536                |
| Solvent                | CHLOROFORM-d                                                                     | Spectrum Offset (Hz) | 10058.1504                       | Sweep Width (Hz)       | 31565.66             |
|                        |                                                                                  |                      |                                  | Pulse Sequence         | carbonjxp            |
|                        |                                                                                  |                      |                                  | Temperature (degree C) | 18.600               |

2f-C(TT19042601\_Carbon-1-1).esp

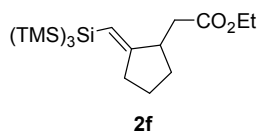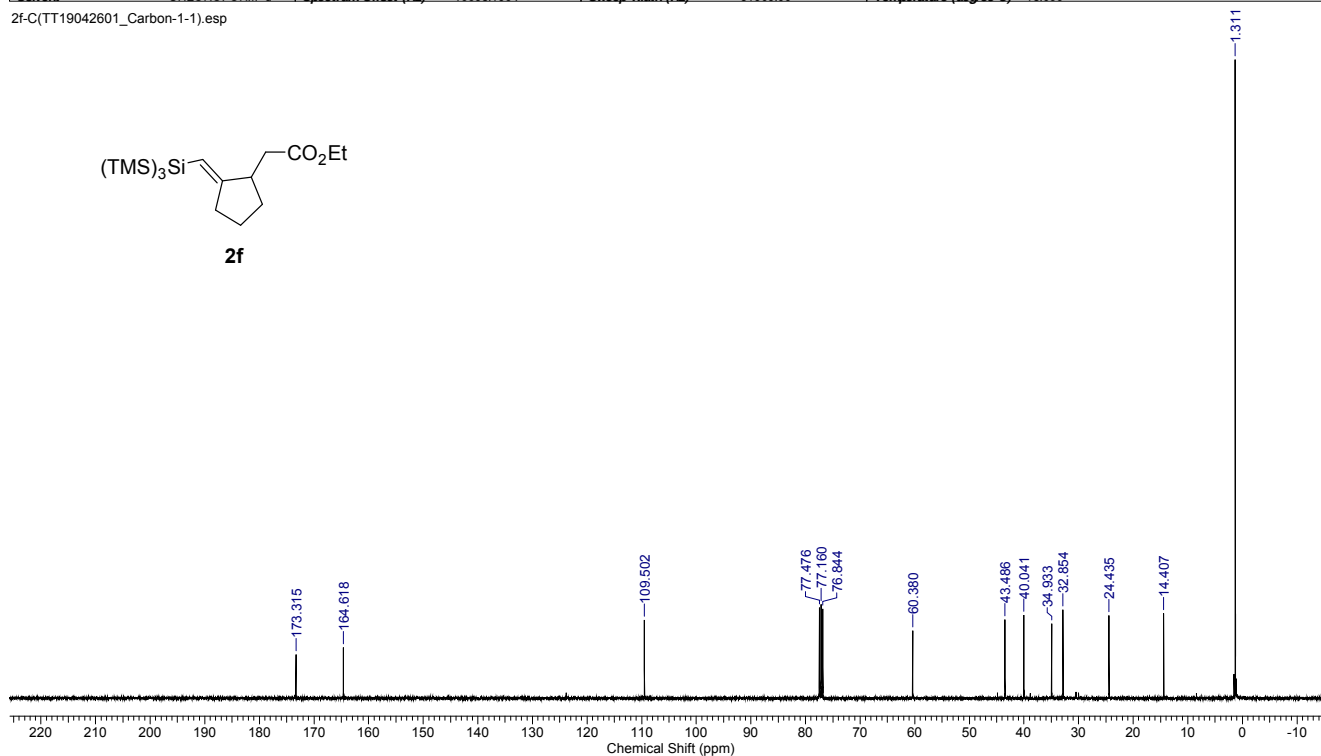

|                        |                                        |                       |              |                  |                      |                        |                      |
|------------------------|----------------------------------------|-----------------------|--------------|------------------|----------------------|------------------------|----------------------|
| Acquisition Time (sec) | 2.1863                                 | Comment               | single_pulse | Date             | 10 Jun 2019 13:42:09 | Date Stamp             | 10 Jun 2019 13:41:18 |
| File Name              | YVWS\data\...TT19061003_Proton-1-1.idf | Frequency (MHz)       | 399.78       | Nucleus          | <sup>1</sup> H       | Number of Transients   | 8                    |
| Origin                 | ECA                                    | Original Points Count | 16384        | Owner            | delta                | Points Count           | 32768                |
| Solvent                | CHLOROFORM-d                           | Spectrum Offset (Hz)  | 2003.9476    | Sweep Width (Hz) | 7494.00              | Pulse Sequence         | proton.jxp           |
|                        |                                        |                       |              |                  |                      | Temperature (degree C) | 19.800               |

TT19061003\_Proton-1-1.esp

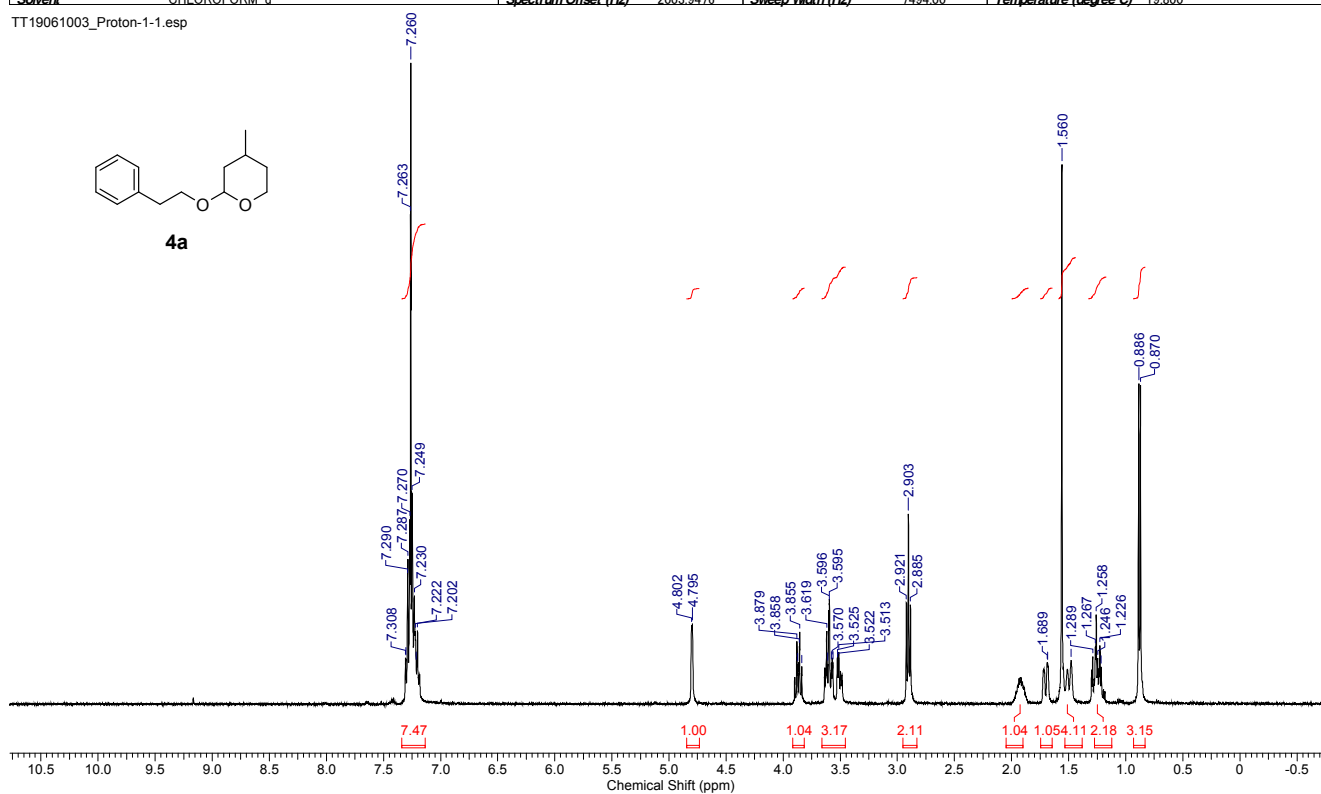

|                        |                                        |                       |                                  |                |                      |                        |                      |
|------------------------|----------------------------------------|-----------------------|----------------------------------|----------------|----------------------|------------------------|----------------------|
| Acquisition Time (sec) | 1.0381                                 | Comment               | single_pulse decoupled gated NOE | Date           | 14 Jun 2019 08:52:38 | Date Stamp             | 14 Jun 2019 08:13:06 |
| File Name              | YVWS\data\...TT19061003_Carbon-1-1.idf | Frequency (MHz)       | 100.53                           | Nucleus        | <sup>13</sup> C      | Number of Transients   | 1024                 |
| Origin                 | ECA                                    | Original Points Count | 32768                            | Owner          | delta                | Points Count           | 65536                |
| Solvent                | CHLOROFORM-d                           | Spectrum Offset (Hz)  | 10058.1504                       | Pulse Sequence | carbon.jxp           | Temperature (degree C) | 21.100               |
|                        |                                        |                       |                                  |                |                      |                        |                      |

TT19061003\_Carbon-1-1.esp

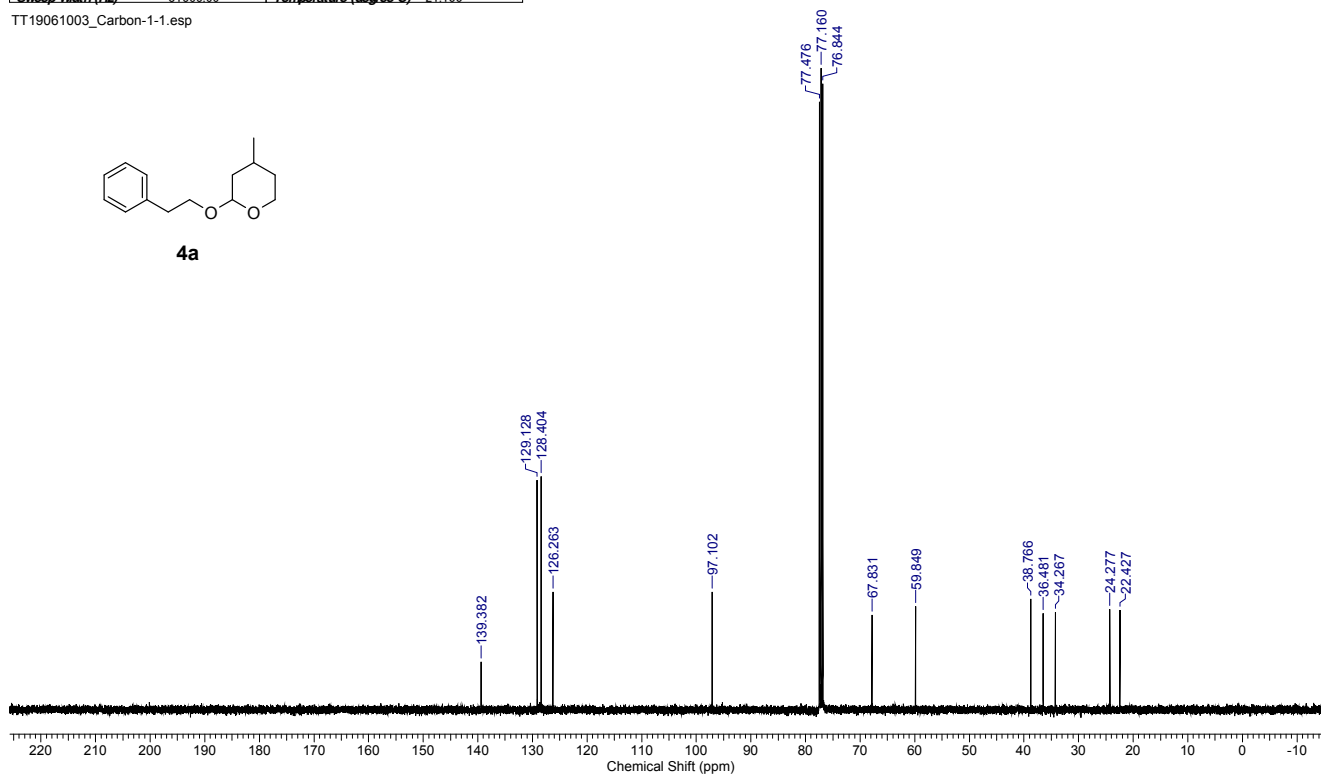

|                        |                                              |                       |              |                  |                      |                        |                      |
|------------------------|----------------------------------------------|-----------------------|--------------|------------------|----------------------|------------------------|----------------------|
| Acquisition Time (sec) | 2.1863                                       | Comment               | single pulse | Date             | 10 Jun 2019 13:30:16 | Date Stamp             | 10 Jun 2019 13:29:24 |
| File Name              | YYWS\data\20190625\TT19061001_Proton-2-1.jdf | Original Points Count | 16384        | Frequency (MHz)  | 399.78               | Nucleus                | <sup>1</sup> H       |
| Origin                 | ECA                                          | Owner                 | delta        | Points Count     | 32768                | Pulse Sequence         | proton.jxp           |
| Solvent                | CHLOROFORM-d                                 | Spectrum Offset (Hz)  | 2003.2618    | Sweep Width (Hz) | 7494.00              | Temperature (degree C) | 20.000               |

TT19061001\_Proton-2-1.esp

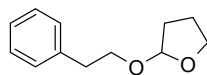

4b

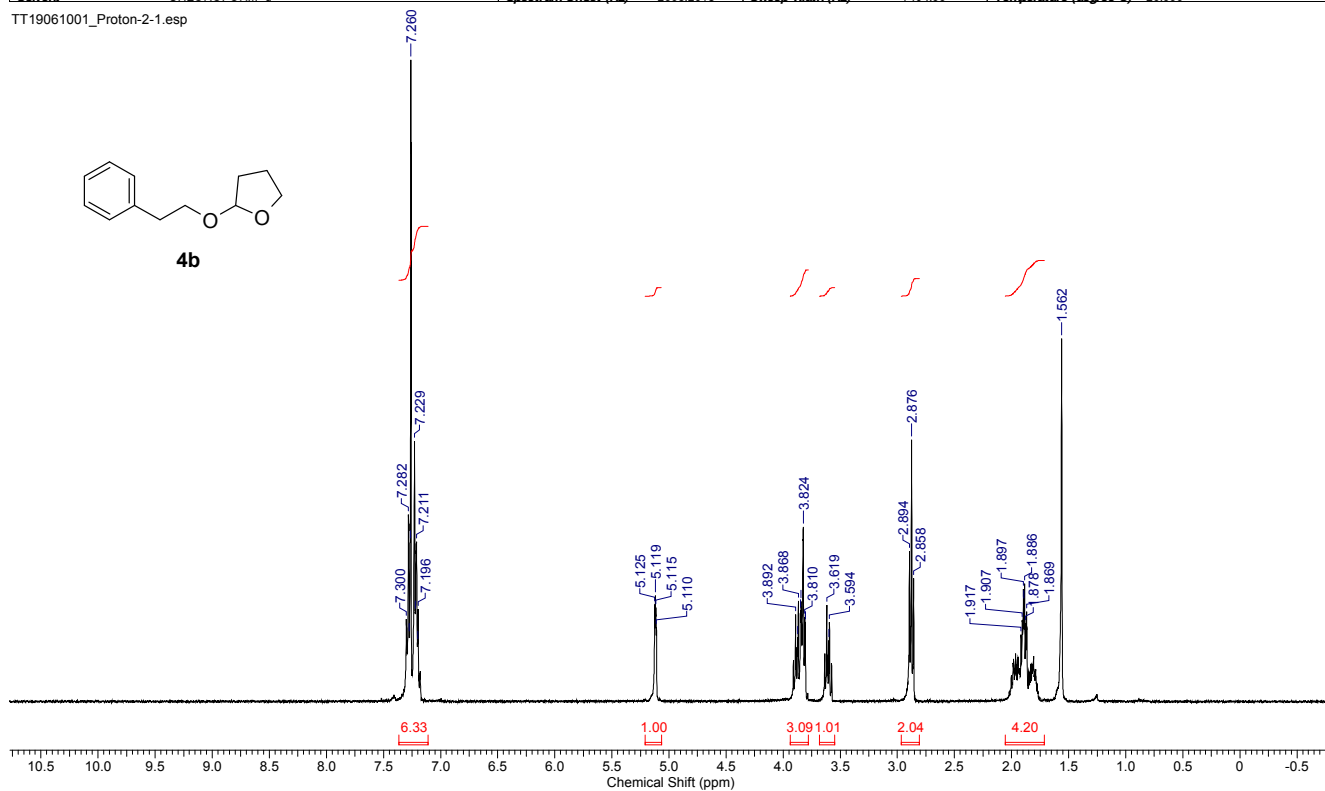

|                        |                      |                        |                                              |                       |                      |
|------------------------|----------------------|------------------------|----------------------------------------------|-----------------------|----------------------|
| Acquisition Time (sec) | 1.0381               | Comment                | single pulse decoupled gated NOE             | Date                  | 14 Jun 2019 13:24:13 |
| Date Stamp             | 14 Jun 2019 12:44:42 | File Name              | YYWS\data\20190625\TT19061001_Carbon-1-1.jdf | Frequency (MHz)       | 100.53               |
| Nucleus                | <sup>13</sup> C      | Number of Transients   | 1024                                         | Origin                | ECA                  |
| Points Count           | 65536                | Pulse Sequence         | carbon.jxp                                   | Original Points Count | 32768                |
| Sweep Width (Hz)       | 31565.66             | Temperature (degree C) | 20.400                                       | Solvent               | CHLOROFORM-d         |
|                        |                      |                        |                                              | Spectrum Offset (Hz)  | 10056.7051           |

TT19061001\_Carbon-1-1.esp

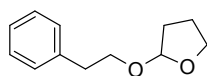

4b

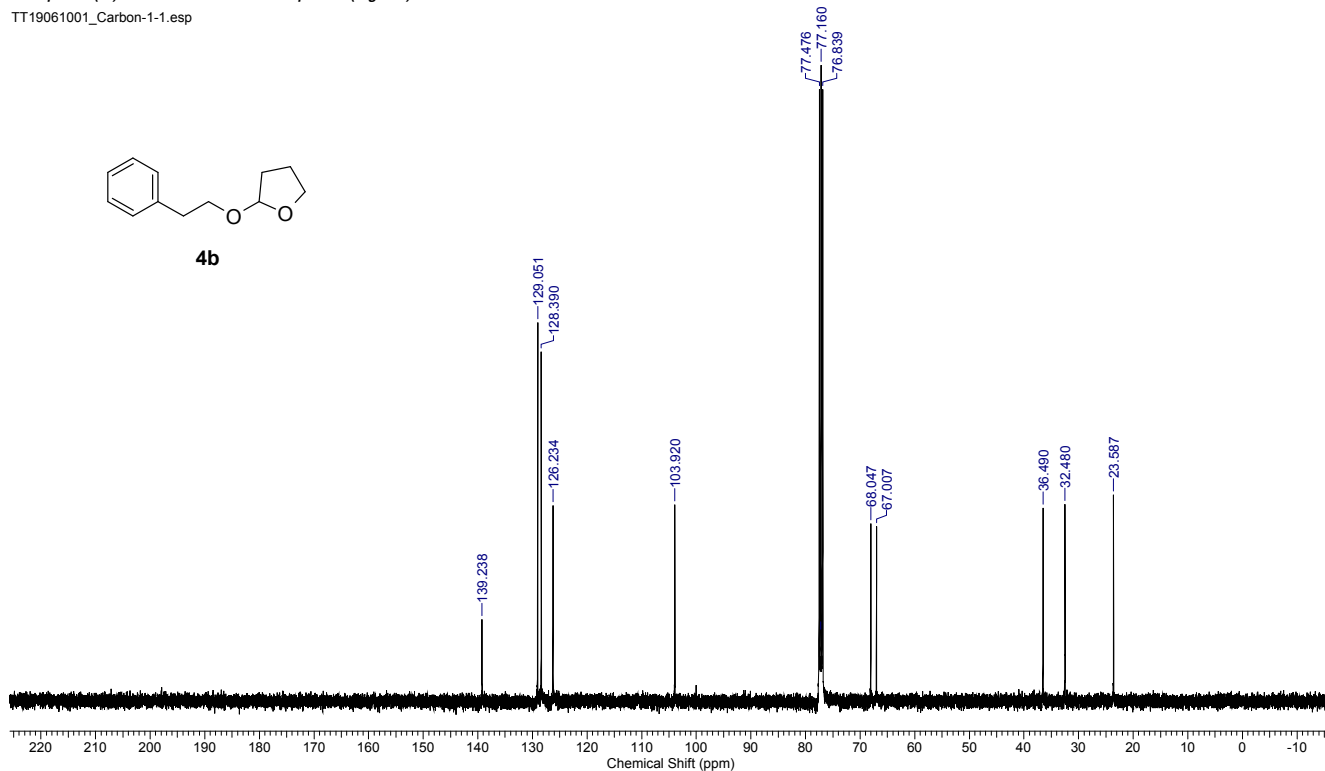

|                        |                                        |                       |              |                  |                      |                        |                      |
|------------------------|----------------------------------------|-----------------------|--------------|------------------|----------------------|------------------------|----------------------|
| Acquisition Time (sec) | 2.1863                                 | Comment               | single_pulse | Date             | 15 Jun 2019 11:56:09 | Date Stamp             | 15 Jun 2019 11:55:18 |
| File Name              | YYWS\data\...TT19061507_Proton-1-1.idf | Frequency (MHz)       | 399.78       | Nucleus          | 1H                   | Number of Transients   | 8                    |
| Origin                 | ECA                                    | Original Points Count | 16384        | Owner            | delta                | Points Count           | 32768                |
| Solvent                | CHLOROFORM-d                           | Spectrum Offset (Hz)  | 2003.4905    | Sweep Width (Hz) | 7494.00              | Pulse Sequence         | proton.jsp           |
|                        |                                        |                       |              |                  |                      | Temperature (degree C) | 20.500               |

TT19061507\_Proton-1-1.esp

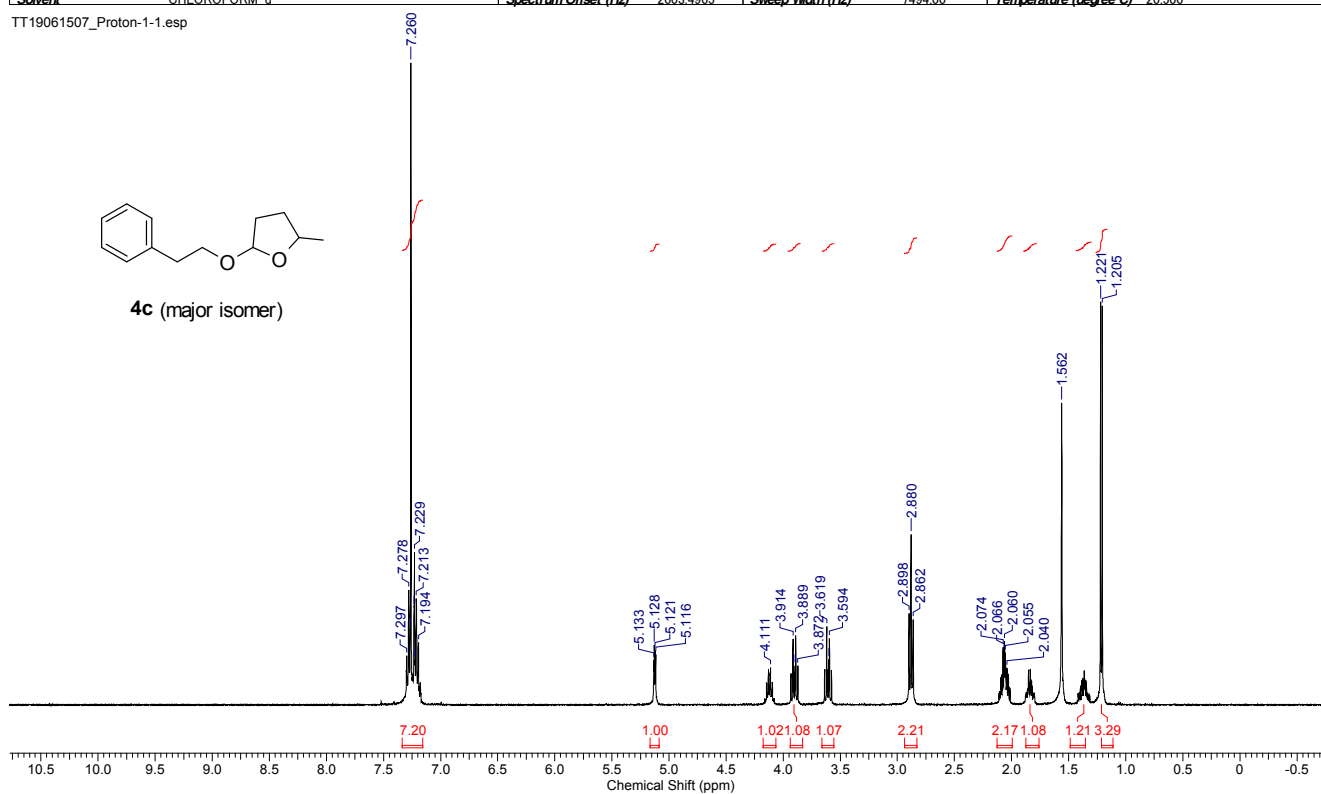

|                        |                      |                        |                                        |         |                      |                       |            |
|------------------------|----------------------|------------------------|----------------------------------------|---------|----------------------|-----------------------|------------|
| Acquisition Time (sec) | 1.0381               | Comment                | single pulse decoupled gated NOE       | Date    | 17 Jun 2019 08:12:18 | Frequency (MHz)       | 100.53     |
| Date Stamp             | 17 Jun 2019 07:32:47 | File Name              | YYWS\data\...TT19061507_Carbon-1-1.idf | Origin  | ECA                  | Original Points Count | 32768      |
| Nucleus                | 13C                  | Number of Transients   | 1024                                   | Owner   | delta                | Spectrum Offset (Hz)  | 10056.7051 |
| Points Count           | 65536                | Pulse Sequence         | carbon.jsp                             | Solvent | CHLOROFORM-d         |                       |            |
| Sweep Width (Hz)       | 31565.66             | Temperature (degree C) | 18.700                                 |         |                      |                       |            |

TT19061507\_Carbon-1-1.esp

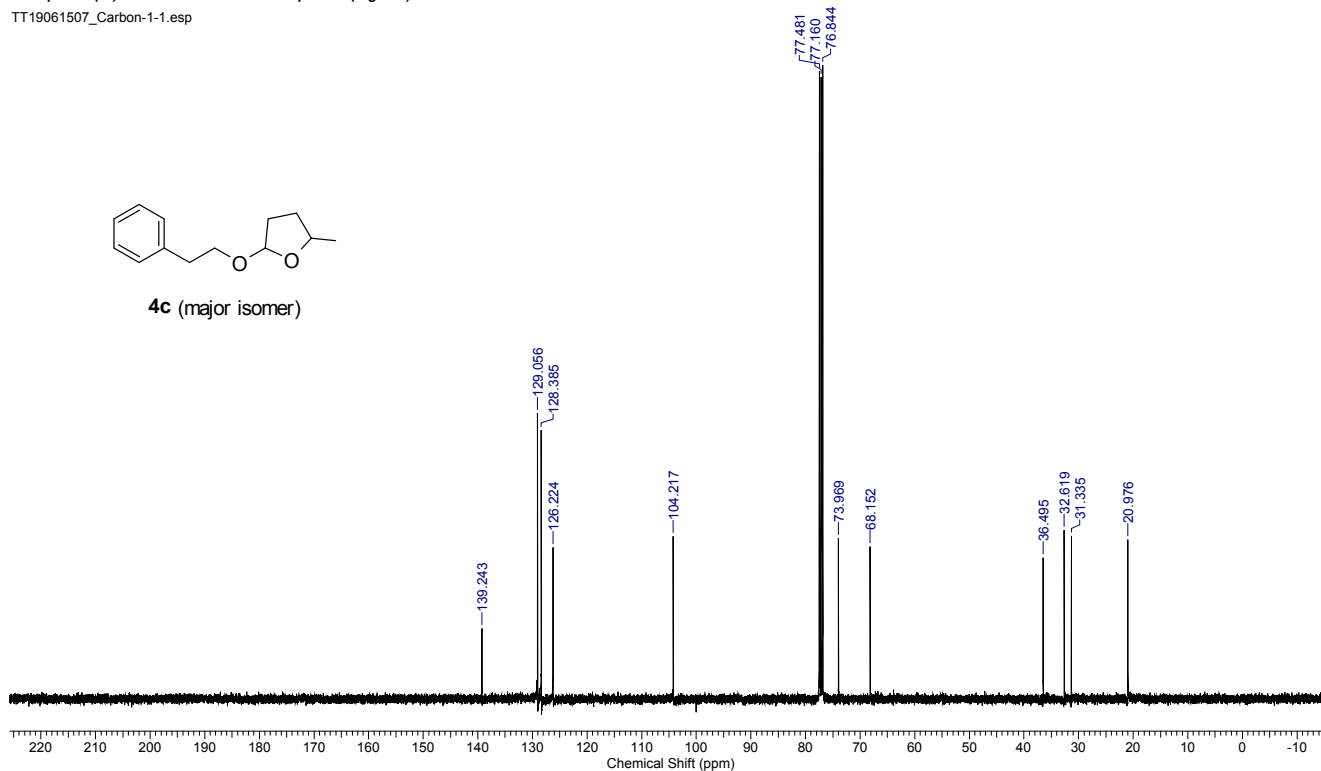

|                        |                                    |                       |              |                  |                      |                        |                      |
|------------------------|------------------------------------|-----------------------|--------------|------------------|----------------------|------------------------|----------------------|
| Acquisition Time (sec) | 2.1863                             | Comment               | single pulse | Date             | 17 Jun 2019 13:07:34 | Date Stamp             | 17 Jun 2019 13:06:43 |
| File Name              | YWS\data\TT19061701_Proton-2-1.idf | Frequency (MHz)       | 399.78       | Nucleus          | <sup>1</sup> H       | Number of Transients   | 8                    |
| Origin                 | ECA                                | Original Points Count | 16384        | Owner            | delta                | Points Count           | 32768                |
| Solvent                | CHLOROFORM-d                       | Spectrum Offset (Hz)  | 2003.7192    | Sweep Width (Hz) | 7494.00              | Pulse Sequence         | proton.jsp           |
|                        |                                    |                       |              |                  |                      | Temperature (degree C) | 20.400               |

4c-Hminor\_TT19061701\_Proton-2-1.esp

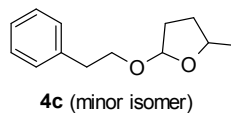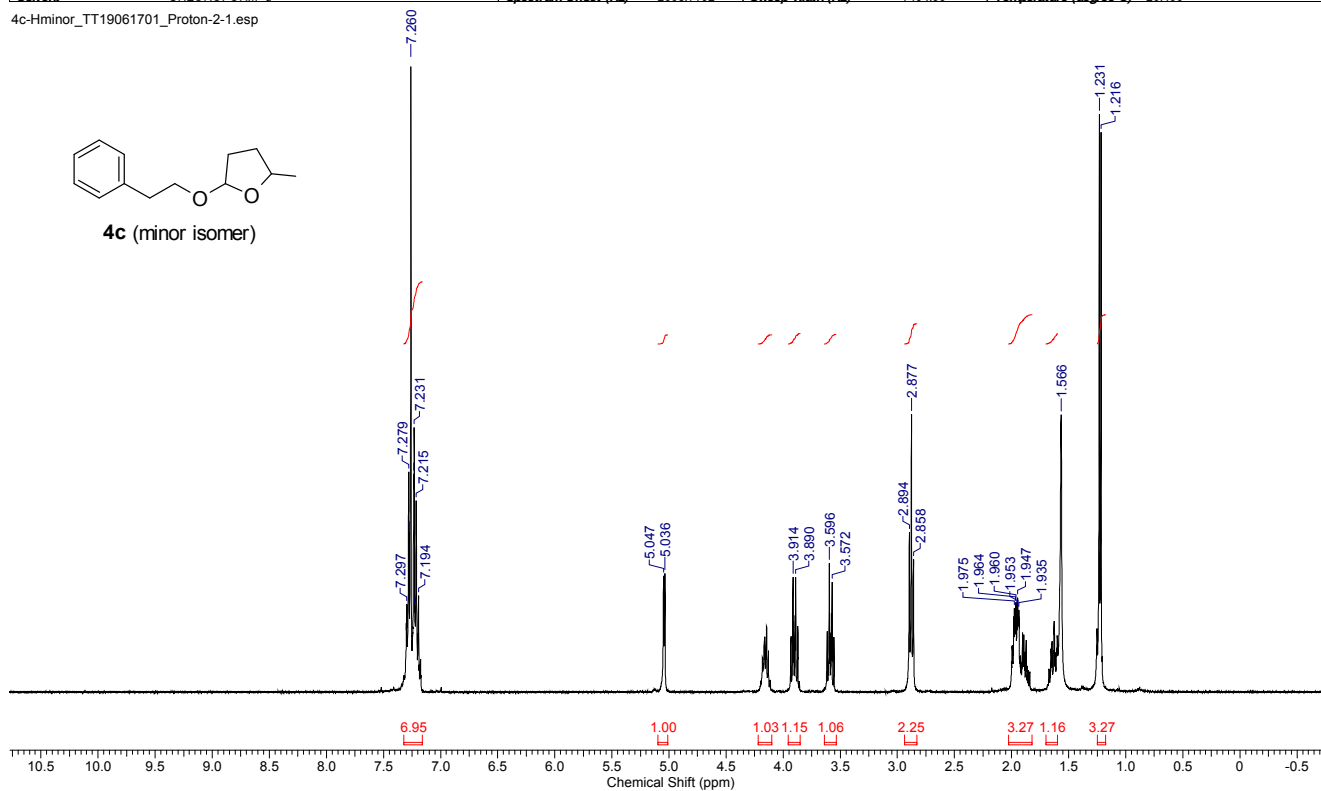

|                        |                      |                        |                                    |         |                      |                       |            |
|------------------------|----------------------|------------------------|------------------------------------|---------|----------------------|-----------------------|------------|
| Acquisition Time (sec) | 1.0381               | Comment                | single pulse decoupled gated NOE   | Date    | 17 Jun 2019 11:17:36 | Frequency (MHz)       | 100.53     |
| Date Stamp             | 17 Jun 2019 11:01:27 | File Name              | YWS\data\TT19061701_Carbon-1-1.idf | Origin  | ECA                  | Original Points Count | 32768      |
| Nucleus                | <sup>13</sup> C      | Number of Transients   | 756                                | Owner   | delta                | Spectrum Offset (Hz)  | 10057.6689 |
| Points Count           | 65536                | Pulse Sequence         | carbon.jsp                         | Solvent | CHLOROFORM-d         |                       |            |
| Sweep Width (Hz)       | 31565.66             | Temperature (degree C) | 19.600                             |         |                      |                       |            |

TT19061701\_Carbon-1-1.esp

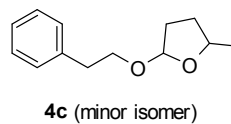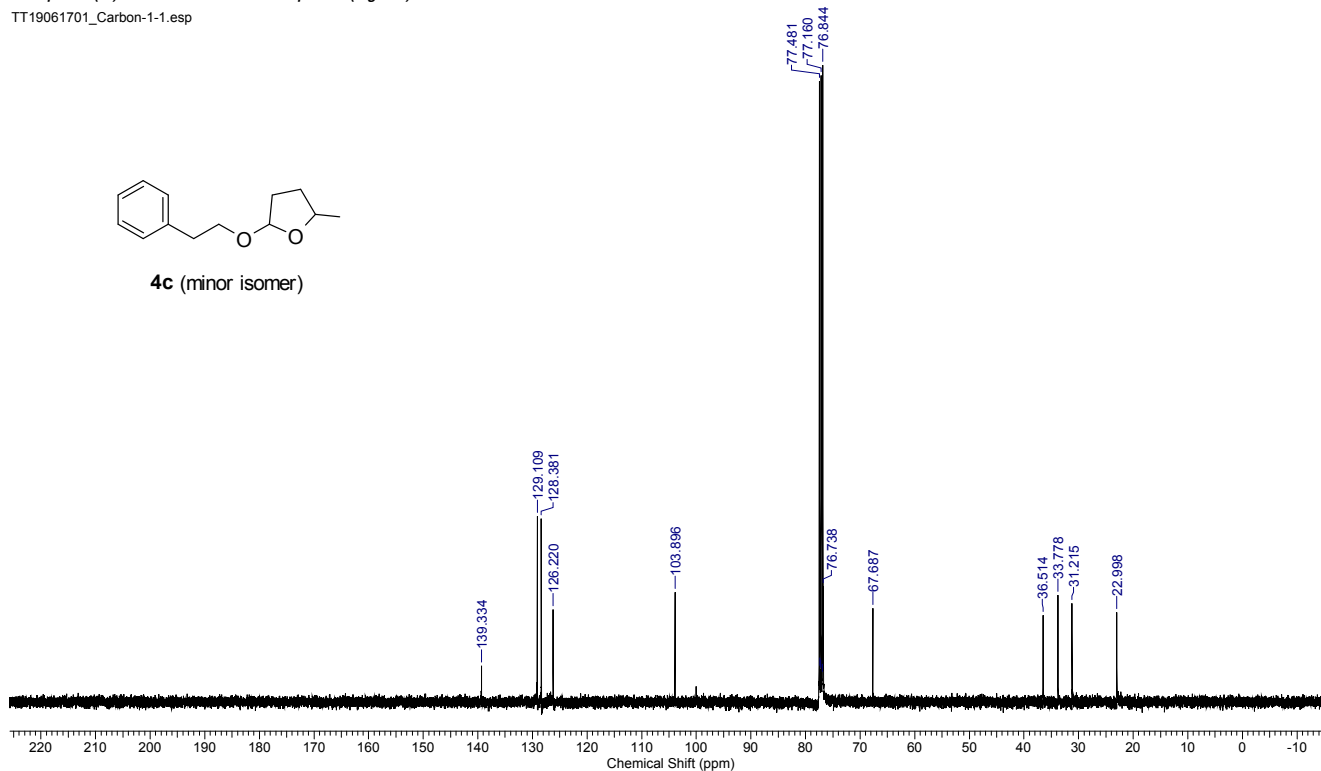

|                        |                                                                         |                      |              |                        |                      |
|------------------------|-------------------------------------------------------------------------|----------------------|--------------|------------------------|----------------------|
| Acquisition Time (sec) | 2.1863                                                                  | Comment              | single_pulse | Date                   | 23 Feb 2017 13:05:05 |
| Date Stamp             | 23 Feb 2017 13:04:14                                                    |                      |              |                        |                      |
| File Name              | Y:\Mac\Cloud\NMR\2016\NMR KV2016\NMR(JEOL)\元々\SY17022301 Proton-2-1.jdf |                      |              | Frequency (MHz)        | 399.78               |
| Nucleus                | <sup>1</sup> H                                                          | Number of Transients | 8            | Origin                 | FCA                  |
| Owner                  | delta                                                                   | Points Count         | 32768        | Pulse Sequence         | proton.jxp           |
| Spectrum Offset (Hz)   | 2003.2618                                                               | Sweep Width (Hz)     | 7494.00      | Temperature (degree C) | 21.300               |
| Solvent                |                                                                         |                      |              |                        |                      |
| CHLOROFORM-d           |                                                                         |                      |              |                        |                      |

SY17022301\_Proton-2-1.jdf

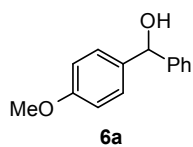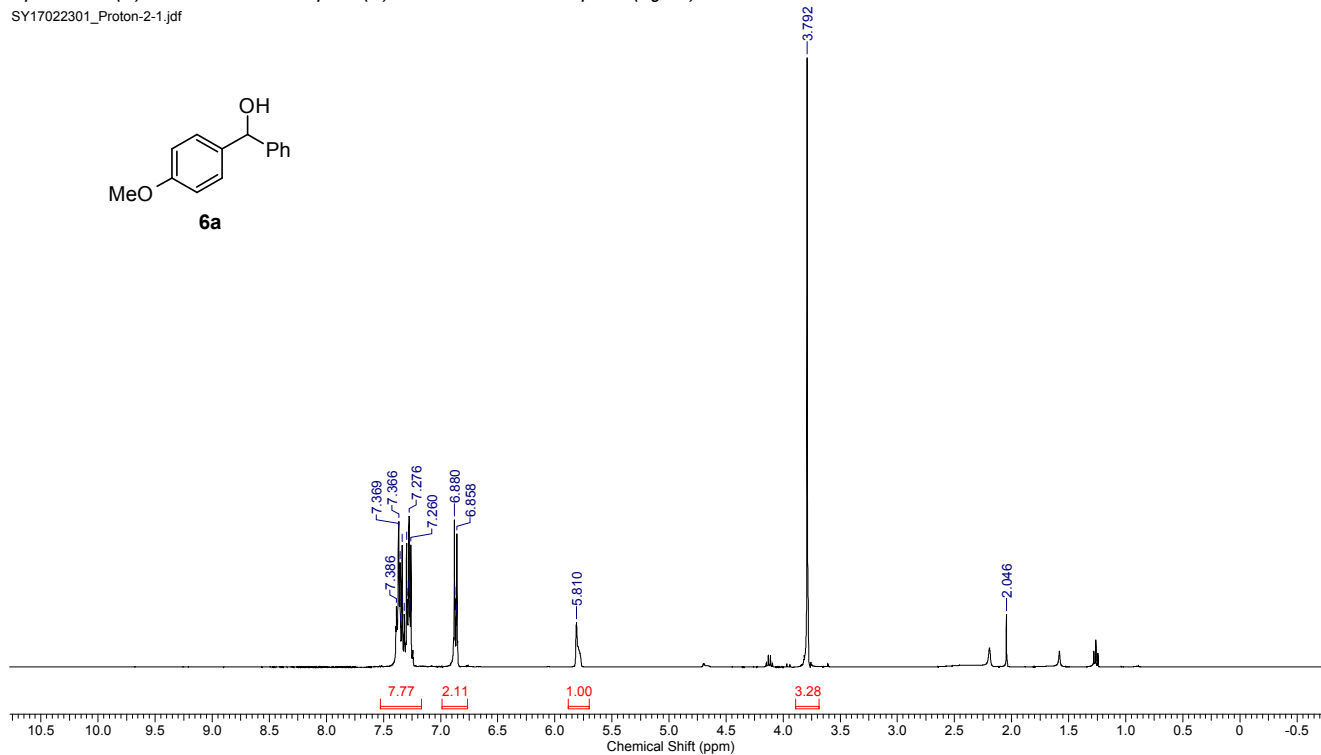

|                        |                                                                         |                      |                                  |                        |                      |
|------------------------|-------------------------------------------------------------------------|----------------------|----------------------------------|------------------------|----------------------|
| Acquisition Time (sec) | 1.0381                                                                  | Comment              | single_pulse decoupled gated NOE | Date                   | 23 Feb 2017 13:17:03 |
| Date Stamp             | 23 Feb 2017 13:07:01                                                    |                      |                                  |                        |                      |
| File Name              | Y:\Mac\Cloud\NMR\2016\NMR KV2016\NMR(JEOL)\元々\SY17022301 Carbon-1-1.jdf |                      |                                  | Frequency (MHz)        | 100.53               |
| Nucleus                | <sup>13</sup> C                                                         | Number of Transients | 256                              | Origin                 | FCA                  |
| Owner                  | delta                                                                   | Points Count         | 65536                            | Pulse Sequence         | carbon.jxp           |
| Spectrum Offset (Hz)   | 10056.7051                                                              | Sweep Width (Hz)     | 31565.66                         | Temperature (degree C) | 21.200               |
| Solvent                |                                                                         |                      |                                  |                        |                      |
| CHLOROFORM-d           |                                                                         |                      |                                  |                        |                      |

SY17022301\_Carbon-1-1.jdf

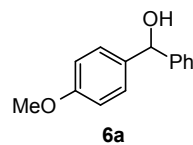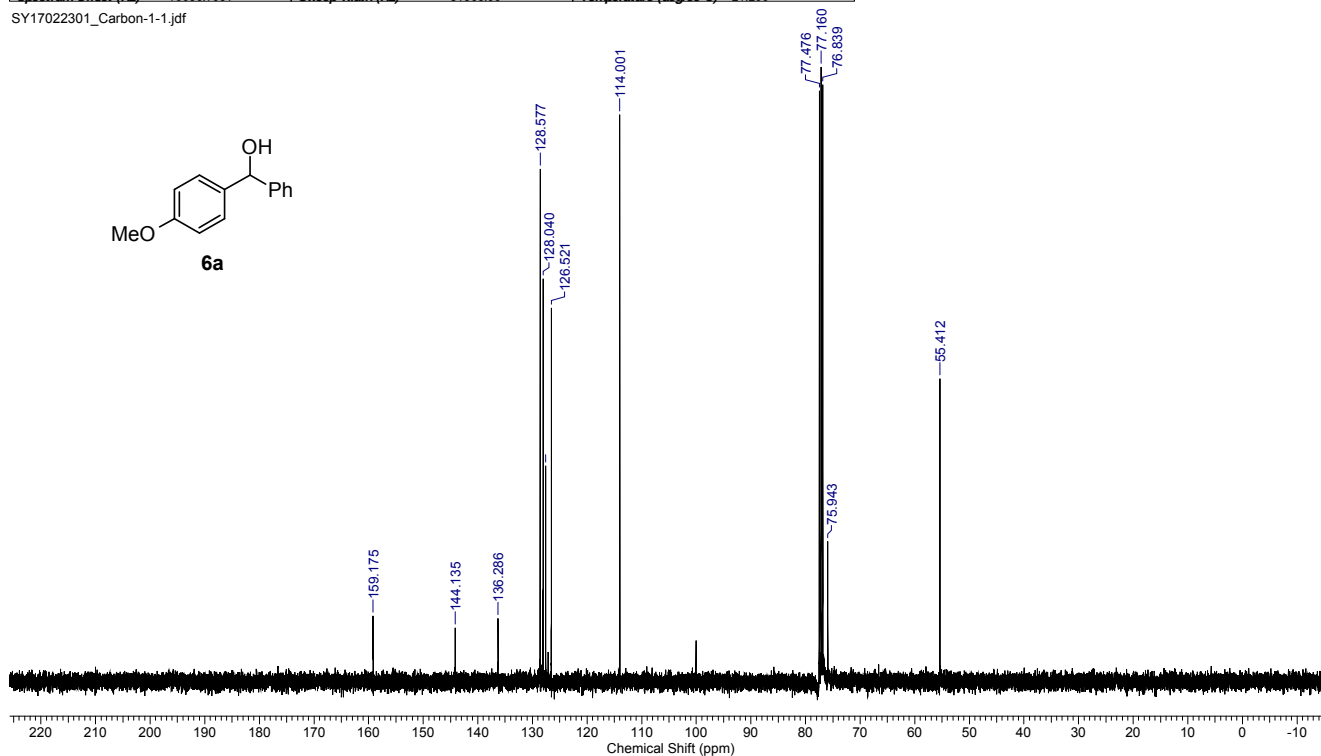

|                        |                                                                           |                      |              |                        |                      |
|------------------------|---------------------------------------------------------------------------|----------------------|--------------|------------------------|----------------------|
| Acquisition Time (sec) | 2.1863                                                                    | Comment              | single_pulse | Date                   | 05 Jun 2017 12:10:22 |
| Date Stamp             | 05 Jun 2017 12:08:31                                                      |                      |              |                        |                      |
| File Name              | \\Mac\Cloud\Y\mnmr\2017\NMR_KY2017\NMR(JEOL)\元元\TT17060503_Proton-1-1.jdf |                      |              | Frequency (MHz)        | 399.78               |
| Nucleus                | <sup>1</sup> H                                                            | Number of Transients | 8            | Origin                 | ECA                  |
| Owner                  | delta                                                                     | Points Count         | 32768        | Pulse Sequence         | proton.jxp           |
| Spectrum Offset (Hz)   | 2003.4905                                                                 | Sweep Width (Hz)     | 7494.00      | Temperature (degree C) | 20.500               |
| Solvent                |                                                                           |                      |              |                        |                      |
| CHLOROFORM-d           |                                                                           |                      |              |                        |                      |

TT17060503\_Proton-1-1.jdf

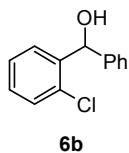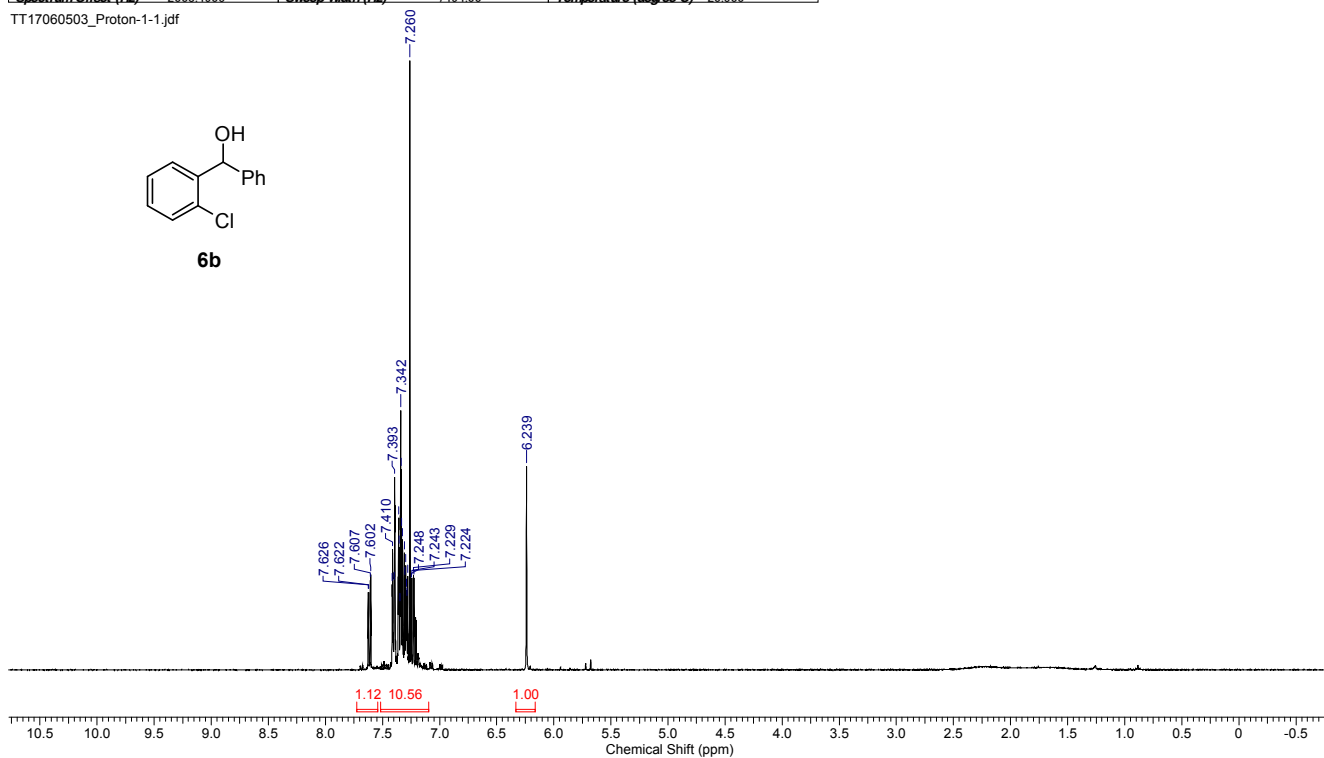

|                        |                                                                           |                      |                                  |                        |                      |
|------------------------|---------------------------------------------------------------------------|----------------------|----------------------------------|------------------------|----------------------|
| Acquisition Time (sec) | 1.0381                                                                    | Comment              | single_pulse decoupled gated NOE | Date                   | 22 Feb 2017 14:27:47 |
| Date Stamp             | 22 Feb 2017 14:22:40                                                      |                      |                                  |                        |                      |
| File Name              | \\Mac\Cloud\Y\mnmr\2016\NMR_KY2016\NMR(JEOL)\元元\SY17022209_Carbon-1-1.jdf |                      |                                  | Frequency (MHz)        | 100.53               |
| Nucleus                | <sup>13</sup> C                                                           | Number of Transients | 128                              | Origin                 | ECA                  |
| Owner                  | delta                                                                     | Points Count         | 65536                            | Pulse Sequence         | carbon.jxp           |
| Spectrum Offset (Hz)   | 10049.9629                                                                | Sweep Width (Hz)     | 31565.66                         | Temperature (degree C) | 19.400               |
| Solvent                |                                                                           |                      |                                  |                        |                      |
| CHLOROFORM-d           |                                                                           |                      |                                  |                        |                      |

SY17022209\_Carbon-1-1.jdf

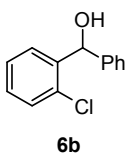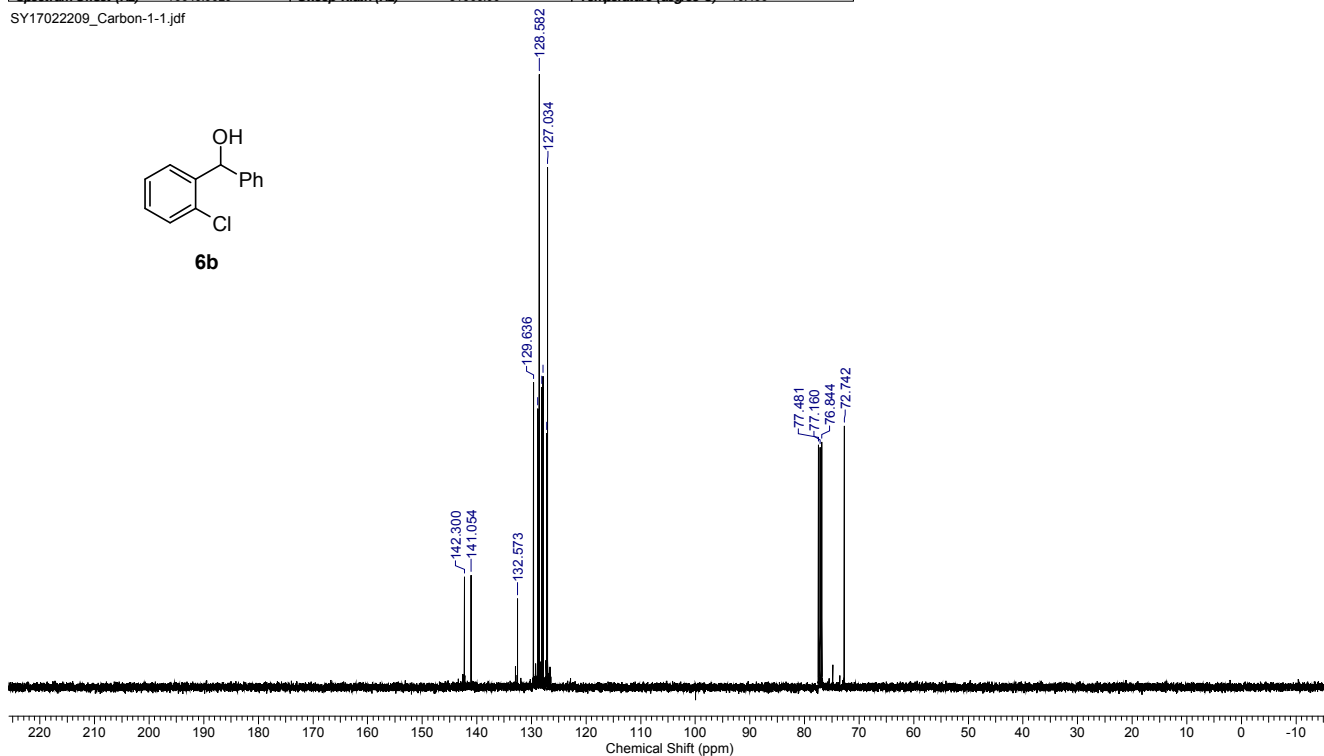

|                        |             |                |                                                                               |                        |                     |
|------------------------|-------------|----------------|-------------------------------------------------------------------------------|------------------------|---------------------|
| Acquisition Time (sec) | 3.5561      | Comment        | STANDARD 1H OBSERVE                                                           | Date                   | Jun. 1 2019         |
| Date Stamp             | Jun. 1 2019 | File Name      | Y:\Mac\Cloud\Y\2019\NMR\2019\NMR KY2019NMR (agilent)\Ykoba\SK19060104.fid\fid | Frequency (MHz)        | 300.05              |
| Frequency (MHz)        | 300.05      | Nucleus        | 1H                                                                            | Number of Transients   | 16                  |
| Points Count           | 65536       | Pulse Sequence | s2pul                                                                         | Receiver Gain          | 24.00               |
| Spectrum Offset (Hz)   | 1698.8915   | Spectrum Type  | STANDARD                                                                      | Sweep Width (Hz)       | 4803.07             |
|                        |             |                |                                                                               | Solvent                | CHLOROFORM-d        |
|                        |             |                |                                                                               | Temperature (degree C) | AMBIENT TEMPERATURE |

SK19060104

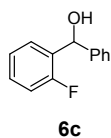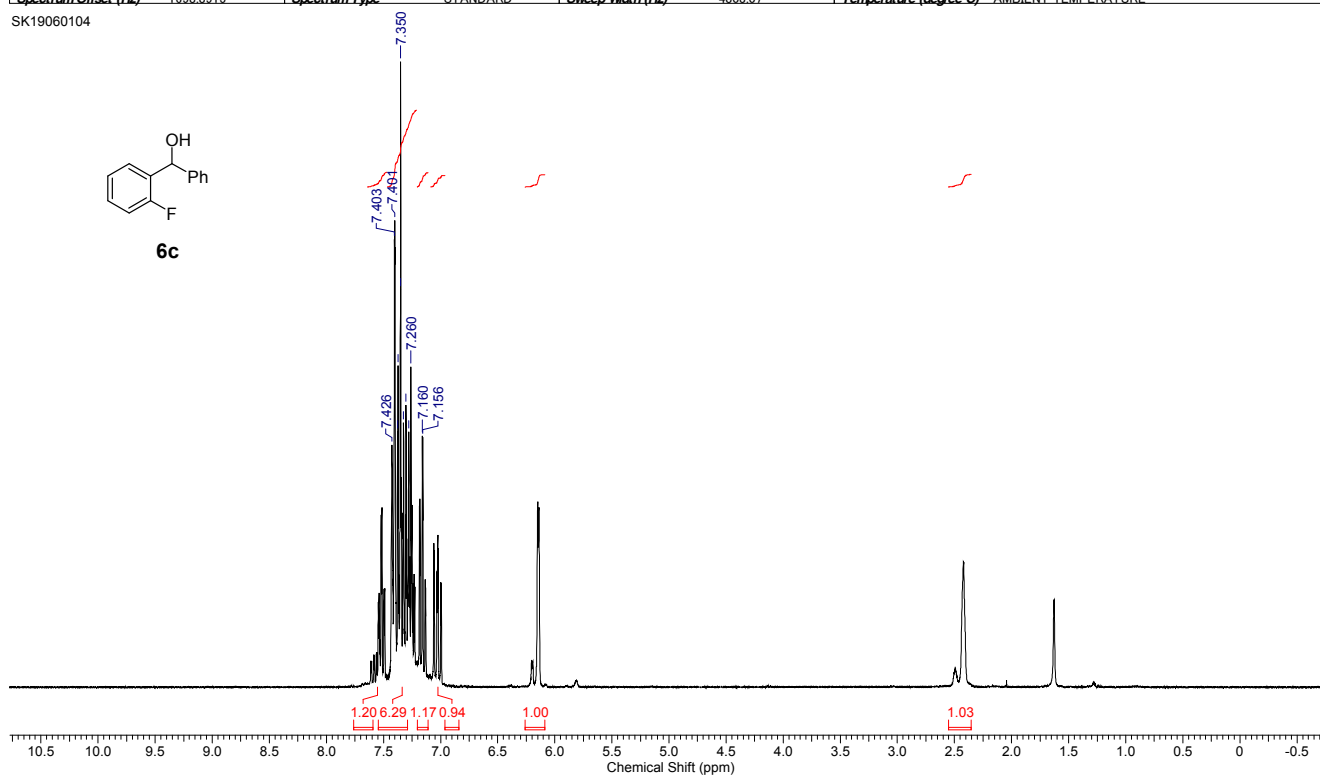

|                        |             |                |                                                                                 |                        |                     |
|------------------------|-------------|----------------|---------------------------------------------------------------------------------|------------------------|---------------------|
| Acquisition Time (sec) | 0.8527      | Comment        | c13-NMR                                                                         | Date                   | Jun. 1 2019         |
| Date Stamp             | Jun. 1 2019 | File Name      | Y:\Mac\Cloud\Y\2019\NMR\2019\NMR KY2019NMR (agilent)\Ykoba\SK19060104_C.fid\fid | Frequency (MHz)        | 75.46               |
| Frequency (MHz)        | 75.46       | Nucleus        | 13C                                                                             | Number of Transients   | 1024                |
| Points Count           | 65536       | Pulse Sequence | s2pul                                                                           | Receiver Gain          | 30.00               |
| Spectrum Offset (Hz)   | 8955.5654   | Spectrum Type  | STANDARD                                                                        | Sweep Width (Hz)       | 22675.74            |
|                        |             |                |                                                                                 | Solvent                | CHLOROFORM-d        |
|                        |             |                |                                                                                 | Temperature (degree C) | AMBIENT TEMPERATURE |

6c-C\_SK19060104\_C.esp

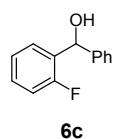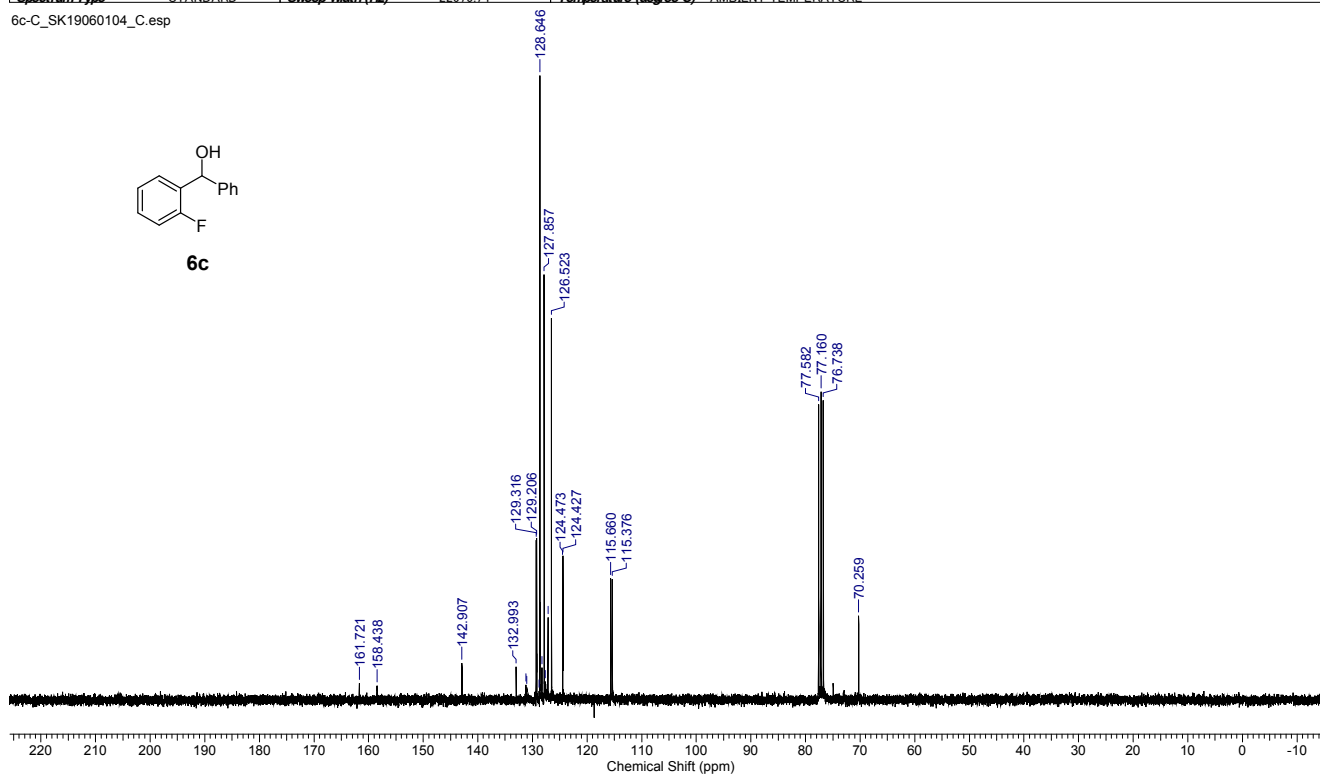



|                        |                                                                                       |                      |              |                        |                      |
|------------------------|---------------------------------------------------------------------------------------|----------------------|--------------|------------------------|----------------------|
| Acquisition Time (sec) | 2.1863                                                                                | Comment              | single_pulse | Date                   | 22 Feb 2017 14:10:24 |
| Date Stamp             | 22 Feb 2017 14:08:33                                                                  |                      |              |                        |                      |
| File Name              | Y:\Mac\Cloud\jmmmmmm\NMR\jmmmmmm\2016NMR_KV2016NMR(JEOL)\元元\SY17022208_Proton-1-1.jdf |                      |              | Frequency (MHz)        | 399.78               |
| Nucleus                | <sup>1</sup> H                                                                        | Number of Transients | 8            | Origin                 | ECA                  |
| Owner                  | delta                                                                                 | Points Count         | 32768        | Pulse Sequence         | proton.jxp           |
| Spectrum Offset (Hz)   | 2003.9476                                                                             | Sweep Width (Hz)     | 7494.00      | Temperature (degree C) | 19.300               |
|                        |                                                                                       |                      |              | Solvent                | CHLOROFORM-d         |

SY17022208\_Proton-1-1.jdf

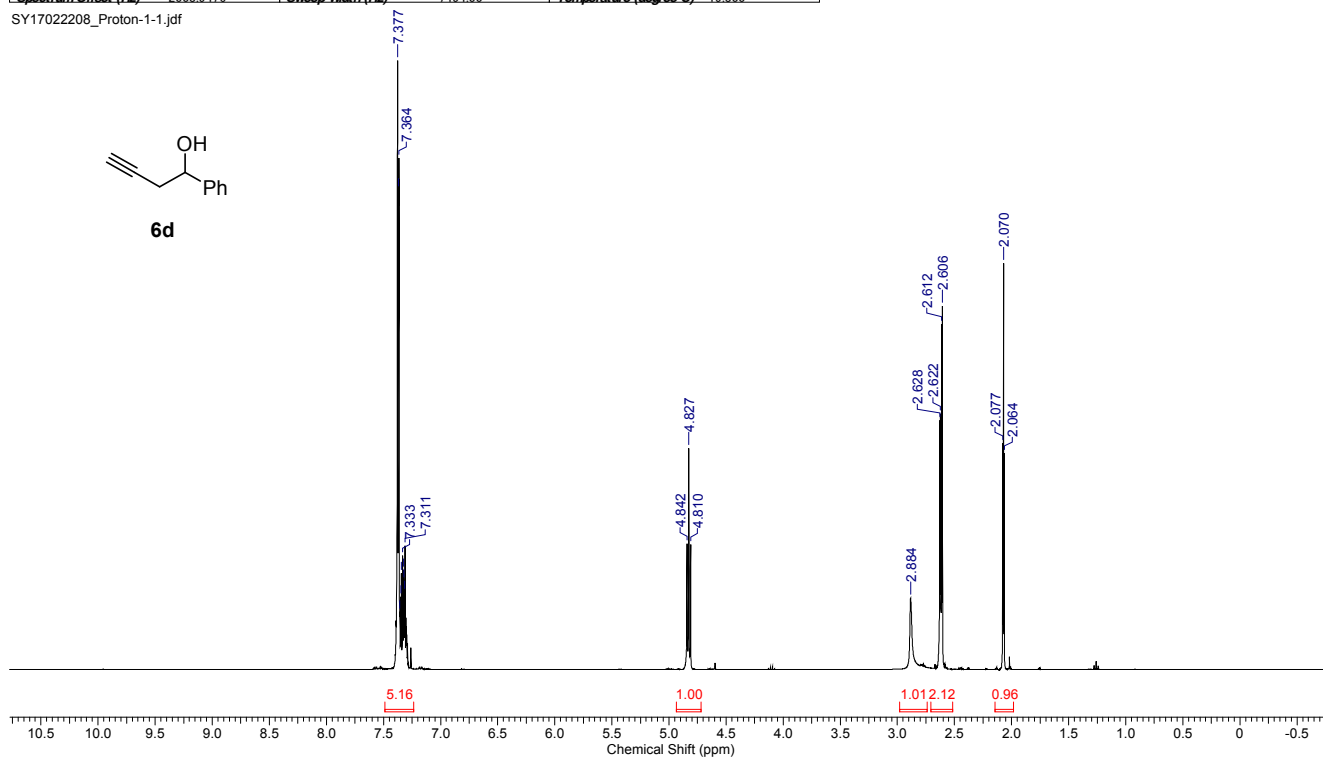

|                        |                                                                                       |                      |                                  |                        |                      |
|------------------------|---------------------------------------------------------------------------------------|----------------------|----------------------------------|------------------------|----------------------|
| Acquisition Time (sec) | 1.0381                                                                                | Comment              | single_pulse decoupled gated NOE | Date                   | 22 Feb 2017 14:17:31 |
| Date Stamp             | 22 Feb 2017 14:12:24                                                                  |                      |                                  |                        |                      |
| File Name              | Y:\Mac\Cloud\jmmmmmm\NMR\jmmmmmm\2016NMR_KV2016NMR(JEOL)\元元\SY17022208_Carbon-1-1.jdf |                      |                                  | Frequency (MHz)        | 100.53               |
| Nucleus                | <sup>13</sup> C                                                                       | Number of Transients | 128                              | Origin                 | ECA                  |
| Owner                  | delta                                                                                 | Points Count         | 65536                            | Pulse Sequence         | carbon.jxp           |
| Spectrum Offset (Hz)   | 10036.4756                                                                            | Sweep Width (Hz)     | 31565.66                         | Temperature (degree C) | 19.300               |
|                        |                                                                                       |                      |                                  | Solvent                | CHLOROFORM-d         |

SY17022208\_Carbon-1-1.jdf

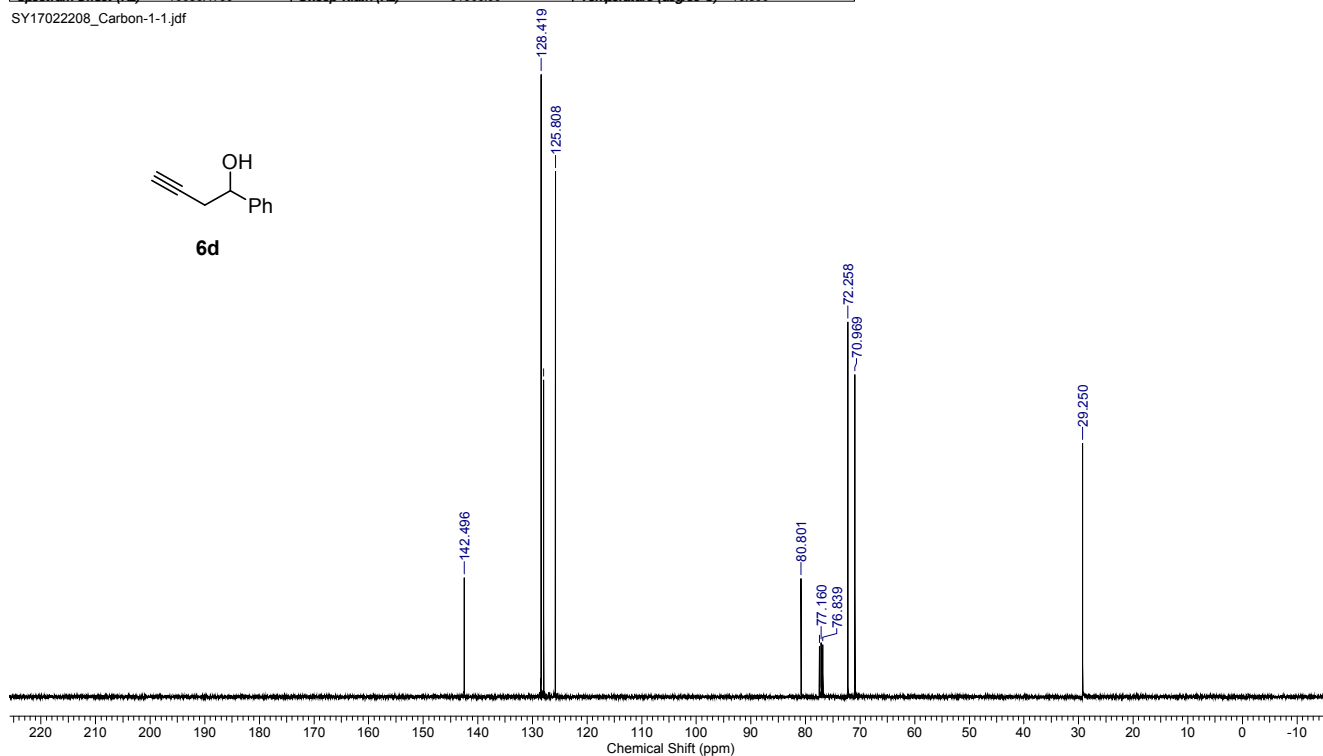

|                        |                                                                                     |                      |              |                        |                      |
|------------------------|-------------------------------------------------------------------------------------|----------------------|--------------|------------------------|----------------------|
| Acquisition Time (sec) | 2.1863                                                                              | Comment              | single_pulse | Date                   | 24 Nov 2016 08:16:25 |
| Date Stamp             | 24 Nov 2016 08:15:34                                                                |                      |              |                        |                      |
| File Name              | \\YMac\Cloud\Y\mmmmmm\NMR\2016\2016NMR_KV2016NMR(JEOL)\元元\SY16112401_Proton-1-1.jdf |                      |              | Frequency (MHz)        | 399.78               |
| Nucleus                | <sup>1</sup> H                                                                      | Number of Transients | 8            | Origin                 | ECA                  |
| Owner                  | delta                                                                               | Points Count         | 32768        | Pulse Sequence         | proton.jxp           |
| Spectrum Offset (Hz)   | 2003.2618                                                                           | Sweep Width (Hz)     | 7494.00      | Temperature (degree C) | 17.200               |
| Solvent                | CHLOROFORM-d                                                                        |                      |              |                        |                      |

SY16112401\_Proton-1-1.jdf

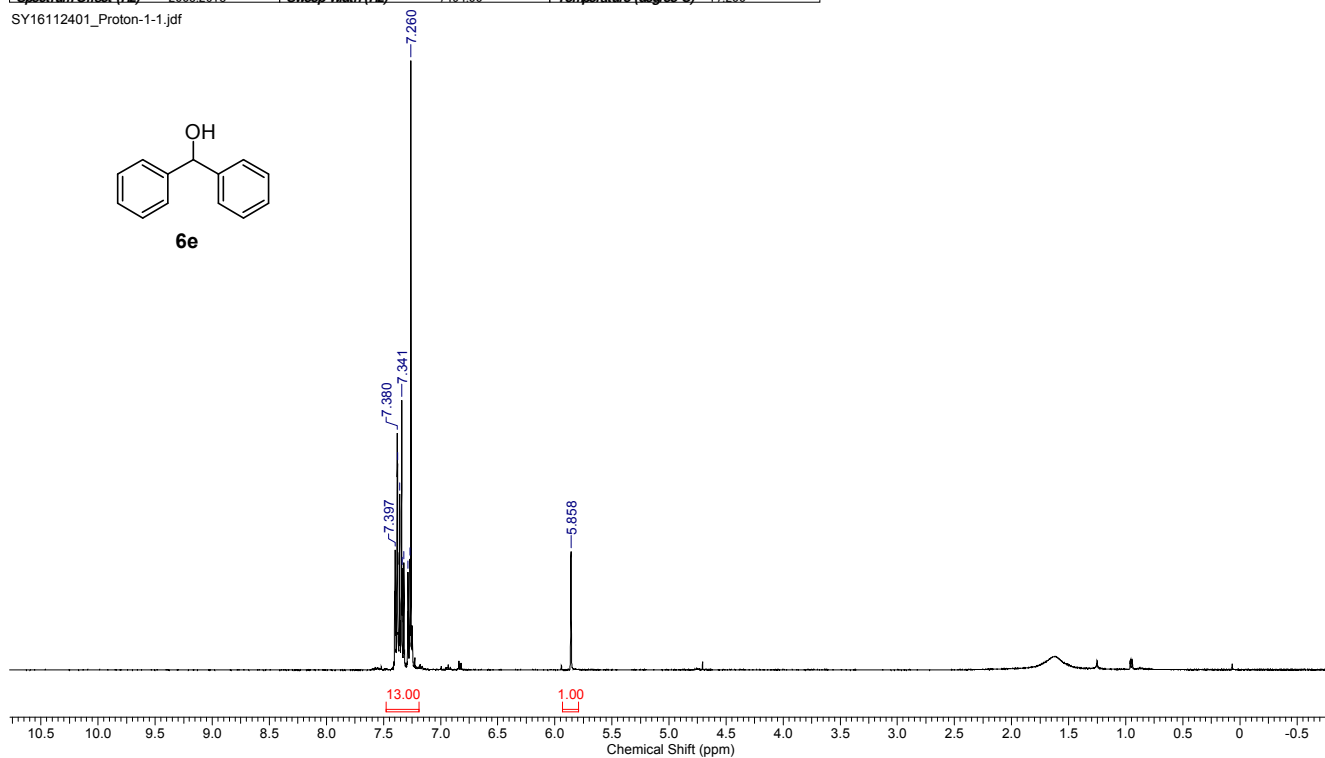

|                        |                                                                                     |                      |                                  |                        |                      |
|------------------------|-------------------------------------------------------------------------------------|----------------------|----------------------------------|------------------------|----------------------|
| Acquisition Time (sec) | 1.0381                                                                              | Comment              | single_pulse decoupled gated NOE | Date                   | 22 Feb 2017 13:10:04 |
| Date Stamp             | 22 Feb 2017 13:04:52                                                                |                      |                                  |                        |                      |
| File Name              | \\YMac\Cloud\Y\mmmmmm\NMR\2016\2016NMR_KV2016NMR(JEOL)\元元\SY17022207_Carbon-1-1.jdf |                      |                                  | Frequency (MHz)        | 100.53               |
| Nucleus                | <sup>13</sup> C                                                                     | Number of Transients | 130                              | Origin                 | ECA                  |
| Owner                  | delta                                                                               | Points Count         | 65536                            | Pulse Sequence         | carbon.jxp           |
| Spectrum Offset (Hz)   | 10049.4805                                                                          | Sweep Width (Hz)     | 31565.66                         | Temperature (degree C) | 19.100               |
| Solvent                | CHLOROFORM-d                                                                        |                      |                                  |                        |                      |

SY17022207\_Carbon-1-1.jdf

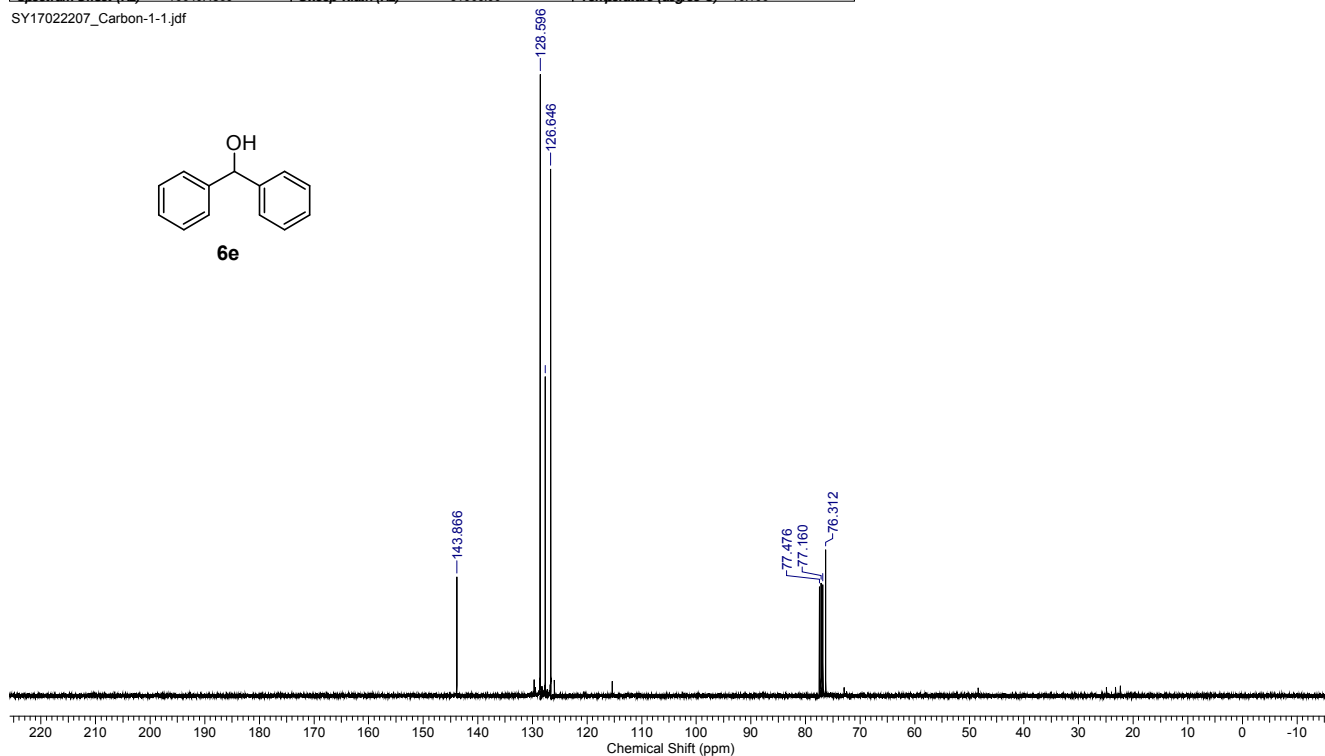



|                        |             |                |                                                                              |                        |                     |
|------------------------|-------------|----------------|------------------------------------------------------------------------------|------------------------|---------------------|
| Acquisition Time (sec) | 3.5561      | Comment        | STANDARD 1H OBSERVE                                                          | Date                   | Jun. 1 2019         |
| Date Stamp             | Jun. 1 2019 | File Name      | Y:\Mac\Cloud\Y\2019\NMR\2019\NMR KY2019NMR (agilent)\Koba\SK19060101.fid\fid | Frequency (MHz)        | 300.05              |
| Frequency (MHz)        | 300.05      | Nucleus        | 1H                                                                           | Number of Transients   | 16                  |
| Points Count           | 65536       | Pulse Sequence | s2pul                                                                        | Receiver Gain          | 34.00               |
| Spectrum Offset (Hz)   | 1698.8915   | Spectrum Type  | STANDARD                                                                     | Sweep Width (Hz)       | 4803.07             |
|                        |             |                |                                                                              | Solvent                | CHLOROFORM-d        |
|                        |             |                |                                                                              | Temperature (degree C) | AMBIENT TEMPERATURE |

SK19060101

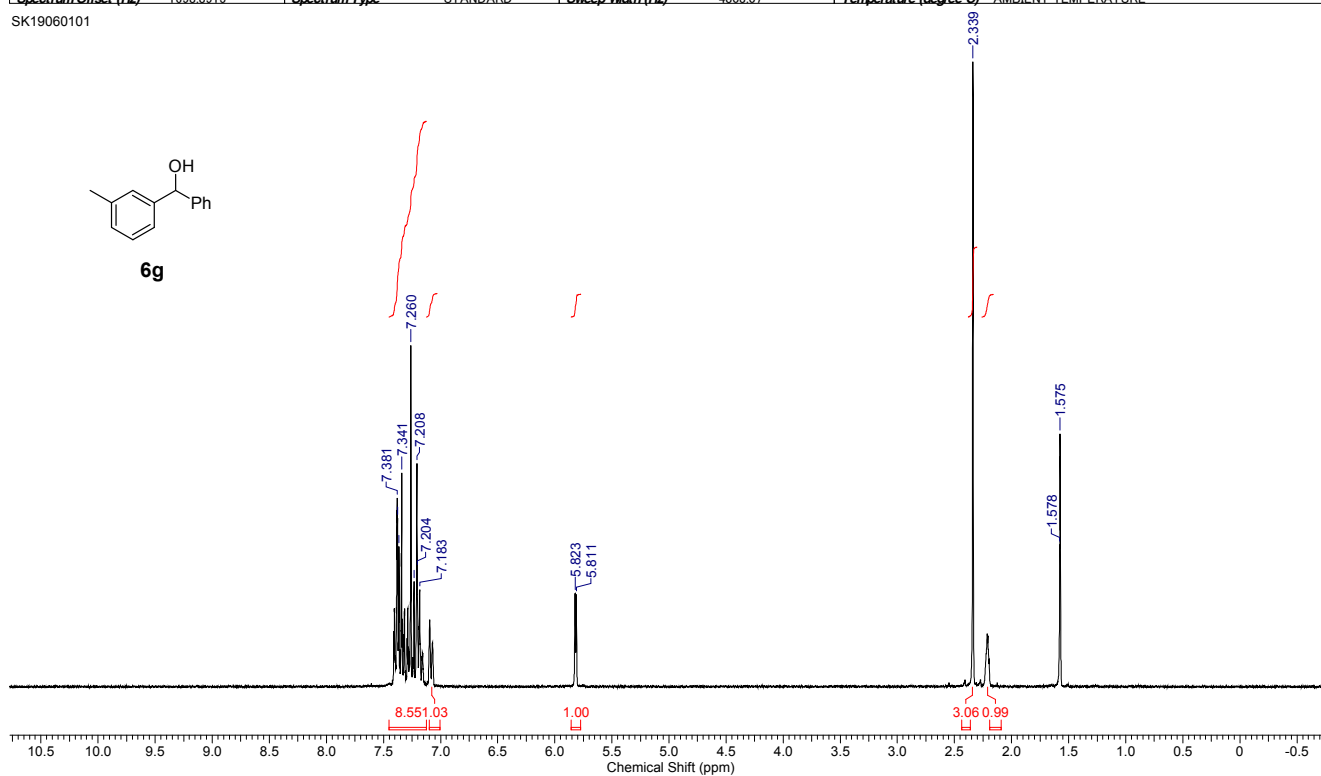

|                        |             |                |                                                                                |                        |                     |
|------------------------|-------------|----------------|--------------------------------------------------------------------------------|------------------------|---------------------|
| Acquisition Time (sec) | 0.8527      | Comment        | c13-NMR                                                                        | Date                   | Jun. 1 2019         |
| Date Stamp             | Jun. 1 2019 | File Name      | Y:\Mac\Cloud\Y\2019\NMR\2019\NMR KY2019NMR (agilent)\Koba\SK19060101_C.fid\fid | Frequency (MHz)        | 75.46               |
| Frequency (MHz)        | 75.46       | Nucleus        | 13C                                                                            | Number of Transients   | 512                 |
| Points Count           | 65536       | Pulse Sequence | s2pul                                                                          | Receiver Gain          | 30.00               |
| Spectrum Offset (Hz)   | 8955.9121   | Spectrum Type  | STANDARD                                                                       | Sweep Width (Hz)       | 22675.74            |
|                        |             |                |                                                                                | Solvent                | CHLOROFORM-d        |
|                        |             |                |                                                                                | Temperature (degree C) | AMBIENT TEMPERATURE |

SK19060101\_C

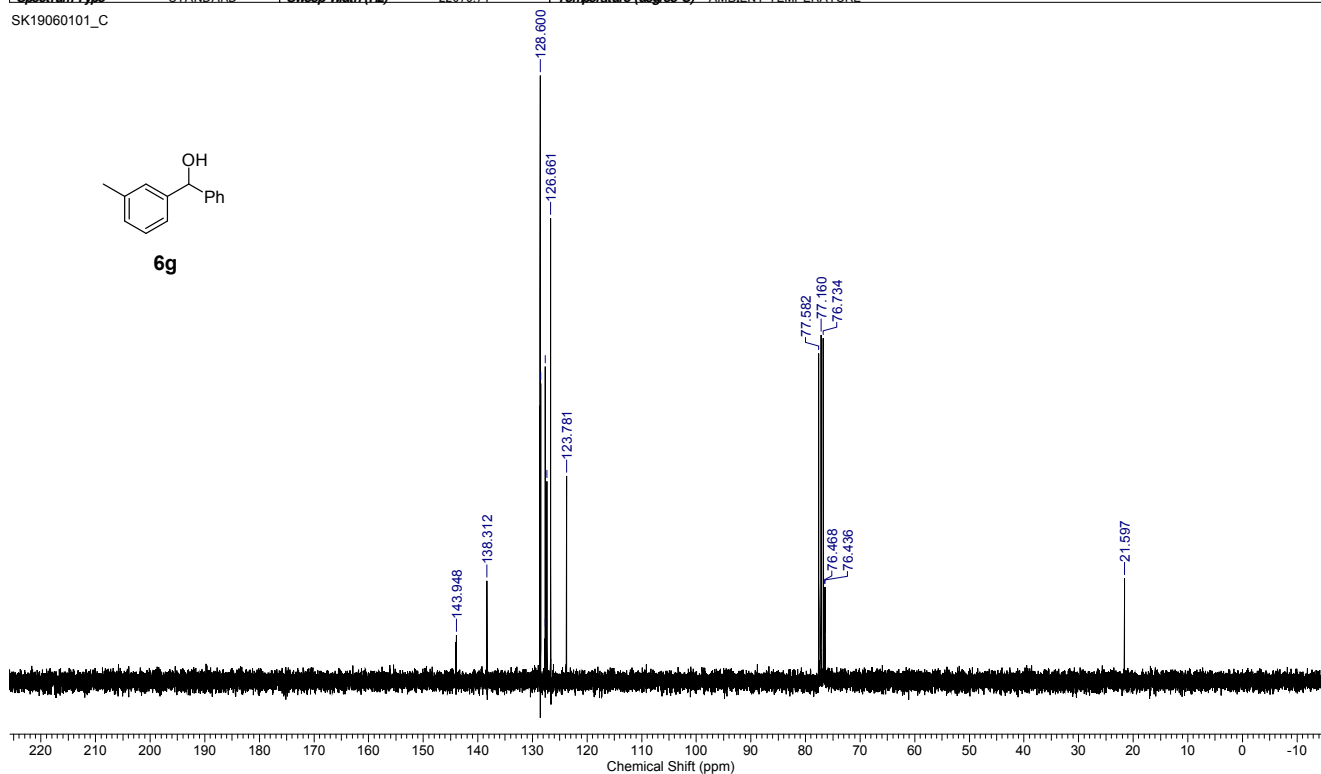

|                        |            |                |                                                                                      |                        |                     |
|------------------------|------------|----------------|--------------------------------------------------------------------------------------|------------------------|---------------------|
| Acquisition Time (sec) | 3.5561     | Comment        | STANDARD 1H OBSERVE                                                                  | Date                   | Jun_1_2019          |
| Date Stamp             | Jun_1_2019 | File Name      | Y:\Mac\Cloud\Y\2019\NMR\20190604\2019NMR KY2019NMR (agilent)\koba\SK19060102.fid\fid |                        |                     |
| Frequency (MHz)        | 300.05     | Nucleus        | 1H                                                                                   | Number of Transients   | 16                  |
| Points Count           | 65536      | Pulse Sequence | s2pul                                                                                | Receiver Gain          | 24.00               |
| Spectrum Offset (Hz)   | 1678.7367  | Spectrum Type  | STANDARD                                                                             | Sweep Width (Hz)       | 4803.07             |
|                        |            |                |                                                                                      | Solvent                | CHLOROFORM-d        |
|                        |            |                |                                                                                      | Temperature (degree C) | AMBIENT TEMPERATURE |

SK19060102

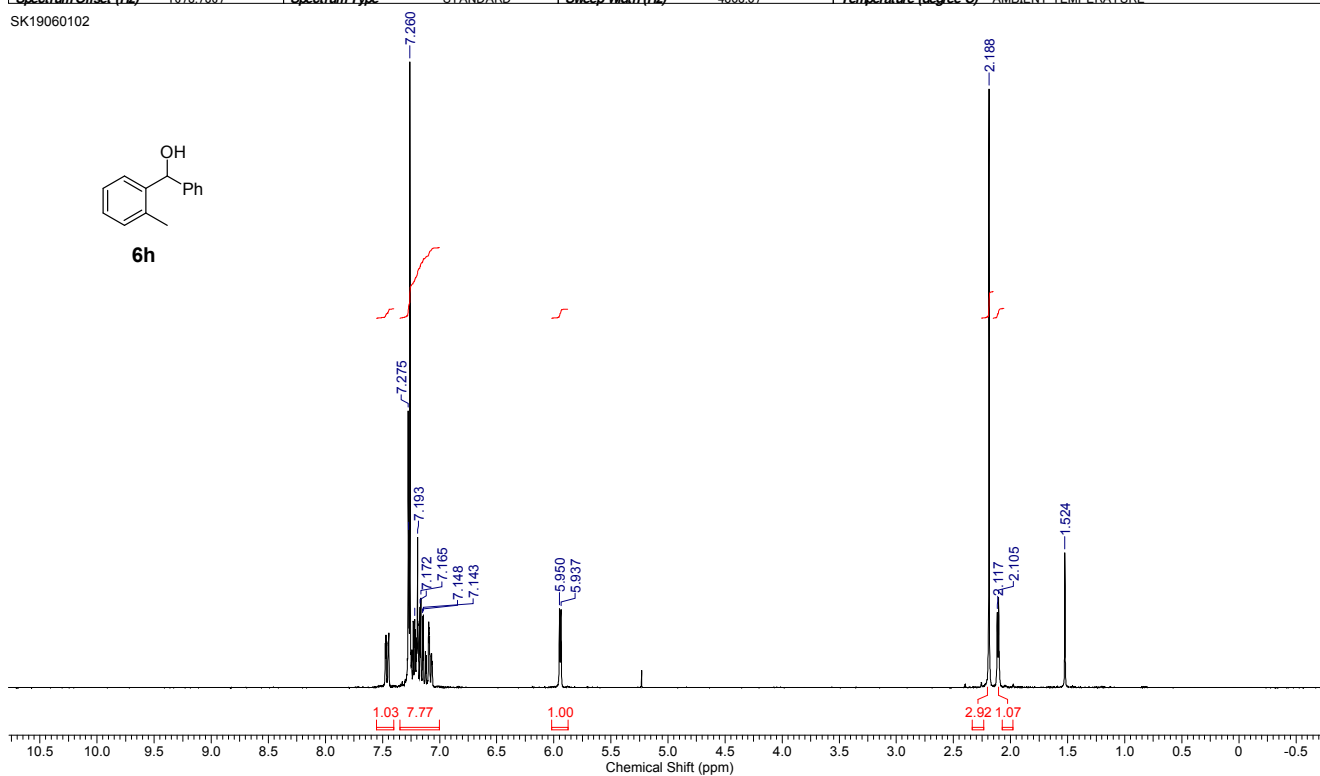

|                        |                                                                                                      |                      |                                  |                        |                      |
|------------------------|------------------------------------------------------------------------------------------------------|----------------------|----------------------------------|------------------------|----------------------|
| Acquisition Time (sec) | 1.0381                                                                                               | Comment              | single pulse decoupled gated NOE | Date                   | 22 Feb 2017 10:18:29 |
| Date Stamp             | 22 Feb 2017 10:11:22                                                                                 |                      |                                  |                        |                      |
| File Name              | Y:\Mac\Cloud\Y\2017\NMR\20170222\2017NMR KY2017NMR (JEOL)\Y\2017\NMR2017\20170222\203_Carbon-1-1.jdf |                      |                                  |                        |                      |
| Frequency (MHz)        | 100.53                                                                                               | Nucleus              | 13C                              | Number of Transients   | 180                  |
| Original Points Count  | 32768                                                                                                | Owner                | delta                            | Points Count           | 65536                |
| Solvent                | CHLOROFORM-d                                                                                         | Spectrum Offset (Hz) | 10052.8525                       | Sweep Width (Hz)       | 31565.66             |
|                        |                                                                                                      |                      |                                  | Temperature (degree C) | 18.100               |

SY17022203\_Carbon-1-1.jdf

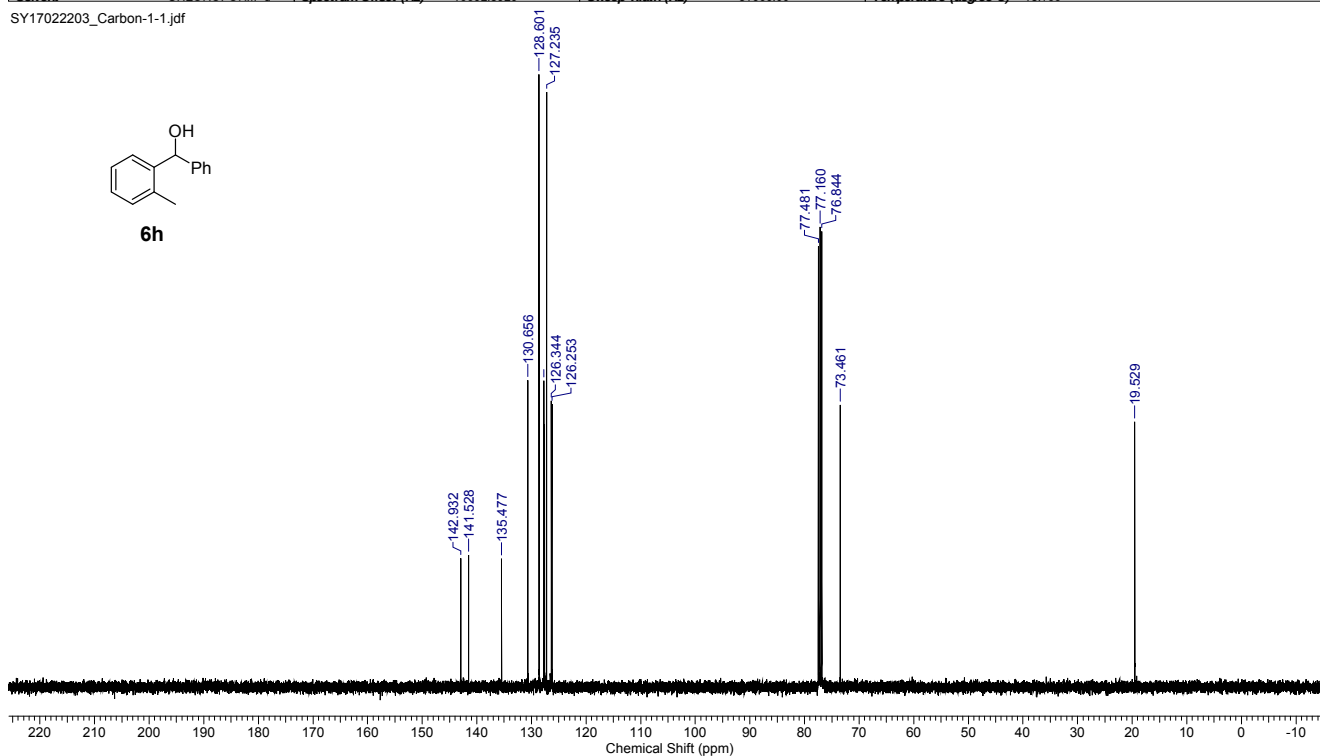

|                        |                                                                               |                      |                 |                        |                      |
|------------------------|-------------------------------------------------------------------------------|----------------------|-----------------|------------------------|----------------------|
| Acquisition Time (sec) | 2.1863                                                                        | Comment              | single_pulse    | Date                   | 21 Jun 2017 13:01:19 |
| Date Stamp             | 21 Jun 2017 13:00:28                                                          |                      |                 |                        |                      |
| File Name              | \\YMac\Cloud\Y2017\NMR\2017\NMR_KY2017\NMR(JEOL)\元元\TT17062101_Proton-1-1.jdf |                      | Frequency (MHz) | 399.78                 |                      |
| Nucleus                | <sup>1</sup> H                                                                | Number of Transients | 8               | Origin                 | ECA                  |
| Owner                  | delta                                                                         | Points Count         | 32768           | Pulse Sequence         | proton.jxp           |
| Spectrum Offset (Hz)   | 2003.4905                                                                     | Sweep Width (Hz)     | 7494.00         | Temperature (degree C) | 20.900               |
| Solvent                | CHLOROFORM-d                                                                  |                      |                 |                        |                      |

TT17062101\_Proton-1-1.jdf

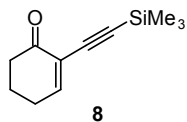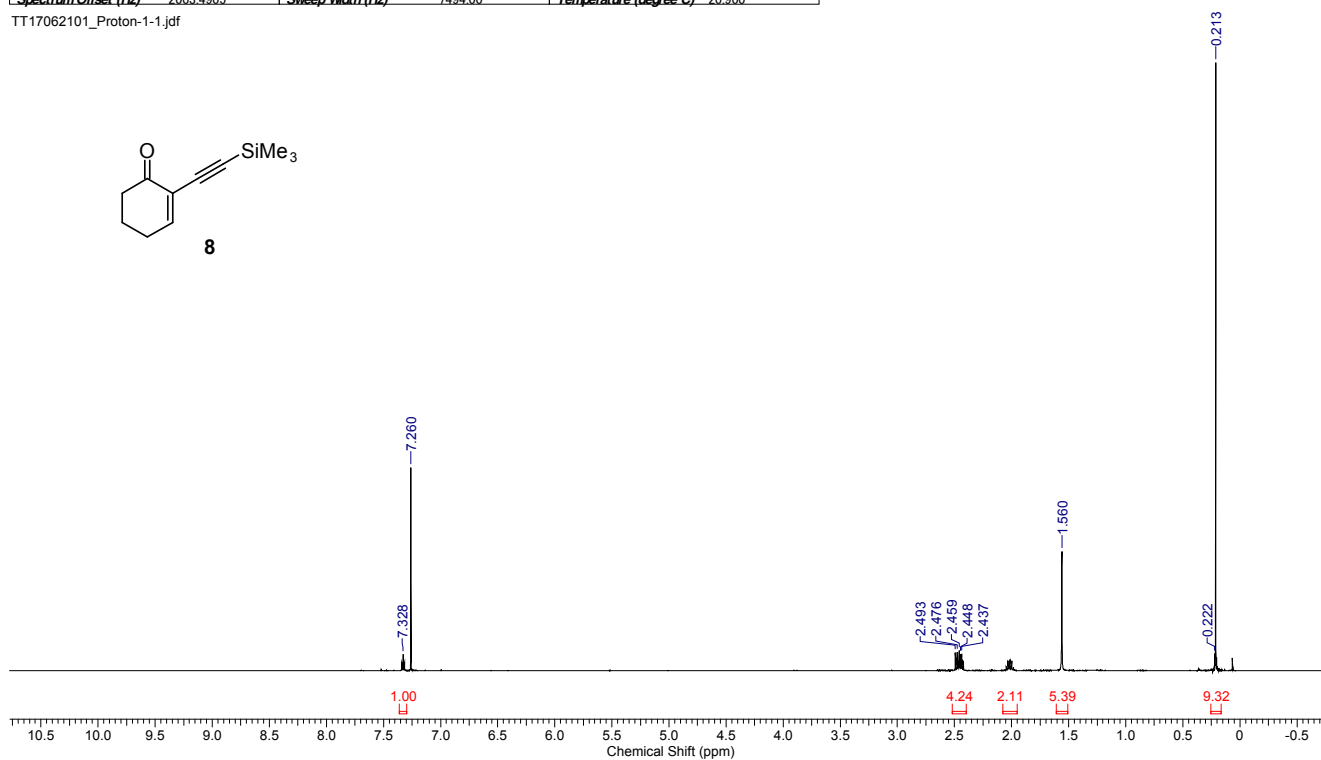

|                        |                                                                               |                      |                                  |                        |                      |
|------------------------|-------------------------------------------------------------------------------|----------------------|----------------------------------|------------------------|----------------------|
| Acquisition Time (sec) | 1.0381                                                                        | Comment              | single_pulse decoupled gated NOE | Date                   | 26 Jan 2019 09:34:46 |
| Date Stamp             | 26 Jan 2019 08:55:14                                                          |                      |                                  |                        |                      |
| File Name              | \\YMac\Cloud\Y2018\NMR\2018\NMR_KY2018\NMR(JEOL)\元元\TT19012601_Carbon-1-1.jdf |                      | Frequency (MHz)                  | 100.53                 |                      |
| Nucleus                | <sup>13</sup> C                                                               | Number of Transients | 1024                             | Origin                 | ECA                  |
| Owner                  | delta                                                                         | Points Count         | 65536                            | Pulse Sequence         | carbon.jxp           |
| Spectrum Offset (Hz)   | 10053.8154                                                                    | Sweep Width (Hz)     | 31565.66                         | Temperature (degree C) | 17.300               |
| Solvent                | CHLOROFORM-d                                                                  |                      |                                  |                        |                      |

TT19012601\_Carbon-1-1.jdf

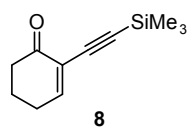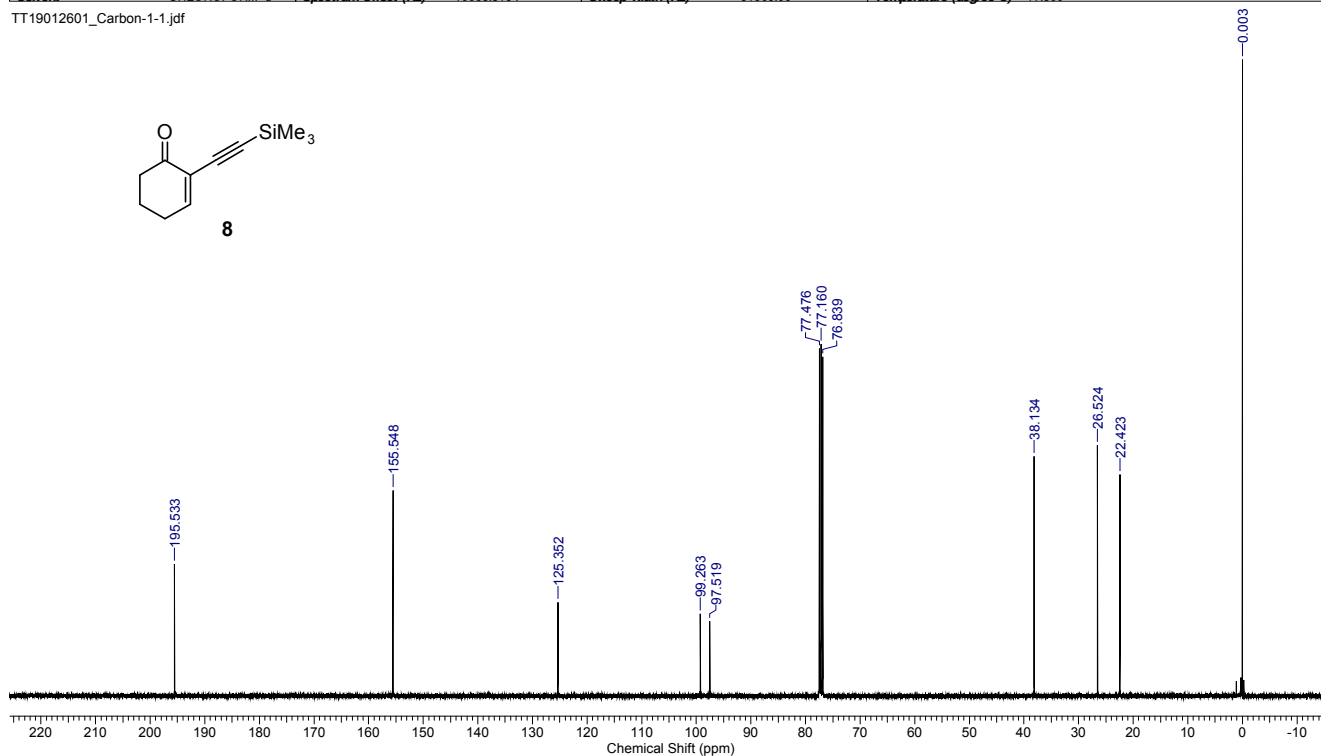

|                        |                                                                                   |                      |              |                        |                      |                       |              |
|------------------------|-----------------------------------------------------------------------------------|----------------------|--------------|------------------------|----------------------|-----------------------|--------------|
| Acquisition Time (sec) | 2.1863                                                                            | Comment              | single_pulse | Date                   | 07 Dec 2017 11:41:15 |                       |              |
| Date Stamp             | 07 Dec 2017 11:40:24                                                              |                      |              |                        |                      |                       |              |
| File Name              | Y:\Mac\Cloud\Y\mmmmmm\NMR\2017\NMR KY2017\NMR(JEOL)\9元元\TT17120702_Proton-1-1.jdf |                      |              |                        | Frequency (MHz)      | 399.78                |              |
| Nucleus                | <sup>1</sup> H                                                                    | Number of Transients | 8            | Origin                 | ECA                  | Original Points Count | 16384        |
| Owner                  | delta                                                                             | Points Count         | 32768        | Pulse Sequence         | proton.jxp           | Solvent               | CHLOROFORM-d |
| Spectrum Offset (Hz)   | 2003.4905                                                                         | Sweep Width (Hz)     | 7494.00      | Temperature (degree C) | 20.500               |                       |              |

TT17120702\_Proton-1-1.jdf

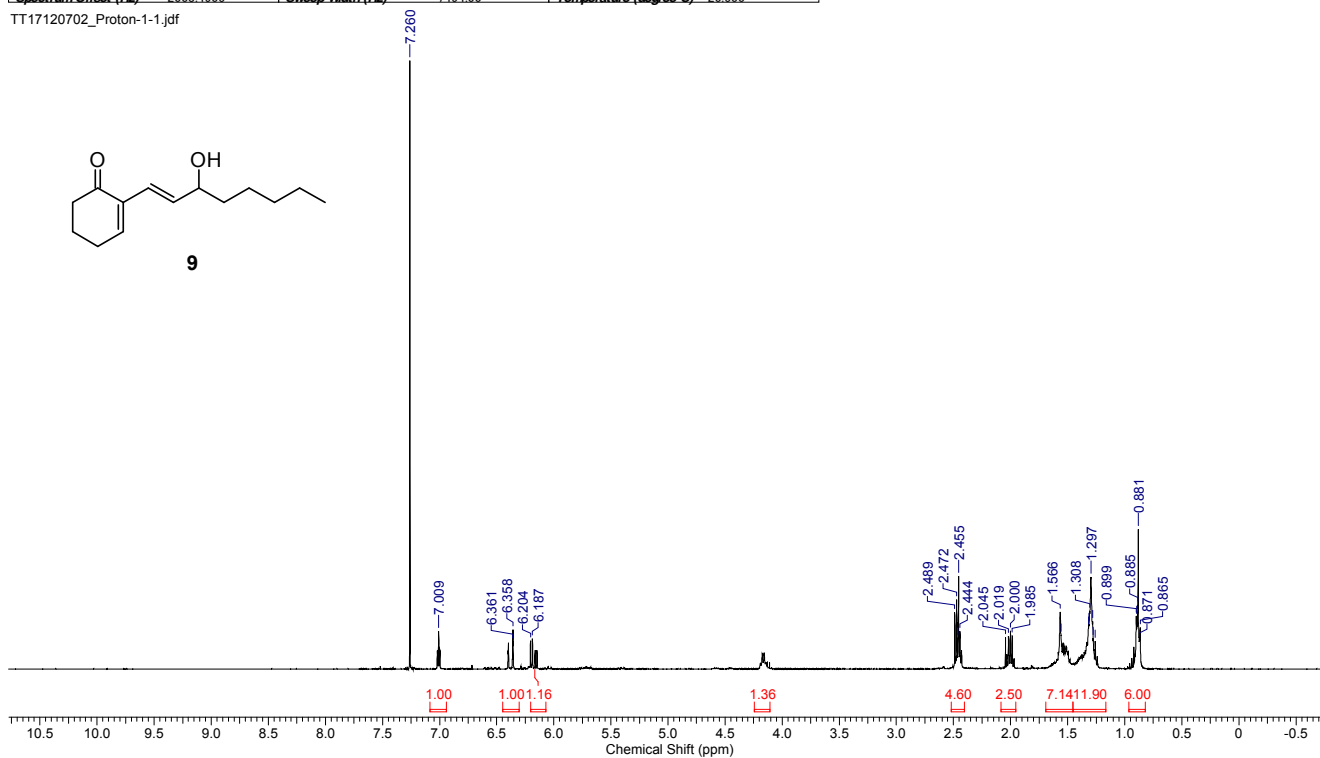

|                        |                                                                                   |                      |                                  |                      |                      |                        |            |
|------------------------|-----------------------------------------------------------------------------------|----------------------|----------------------------------|----------------------|----------------------|------------------------|------------|
| Acquisition Time (sec) | 1.0381                                                                            | Comment              | single_pulse decoupled gated NOE | Date                 | 18 May 2019 09:41:10 |                        |            |
| Date Stamp             | 18 May 2019 09:01:38                                                              |                      |                                  |                      |                      |                        |            |
| File Name              | Y:\Mac\Cloud\Y\mmmmmm\NMR\2019\NMR KY2019\NMR(JEOL)\9元元\SK19051801_Carbon-1-1.jdf |                      |                                  |                      |                      |                        |            |
| Frequency (MHz)        | 100.53                                                                            | Nucleus              | <sup>13</sup> C                  | Number of Transients | 1024                 | Origin                 | ECA        |
| Original Points Count  | 32768                                                                             | Owner                | delta                            | Points Count         | 65536                | Pulse Sequence         | carbon.jxp |
| Solvent                | CHLOROFORM-d                                                                      | Spectrum Offset (Hz) | 10056.2236                       | Sweep Width (Hz)     | 31565.66             | Temperature (degree C) | 19.500     |

SK19051801\_Carbon-1-1.jdf

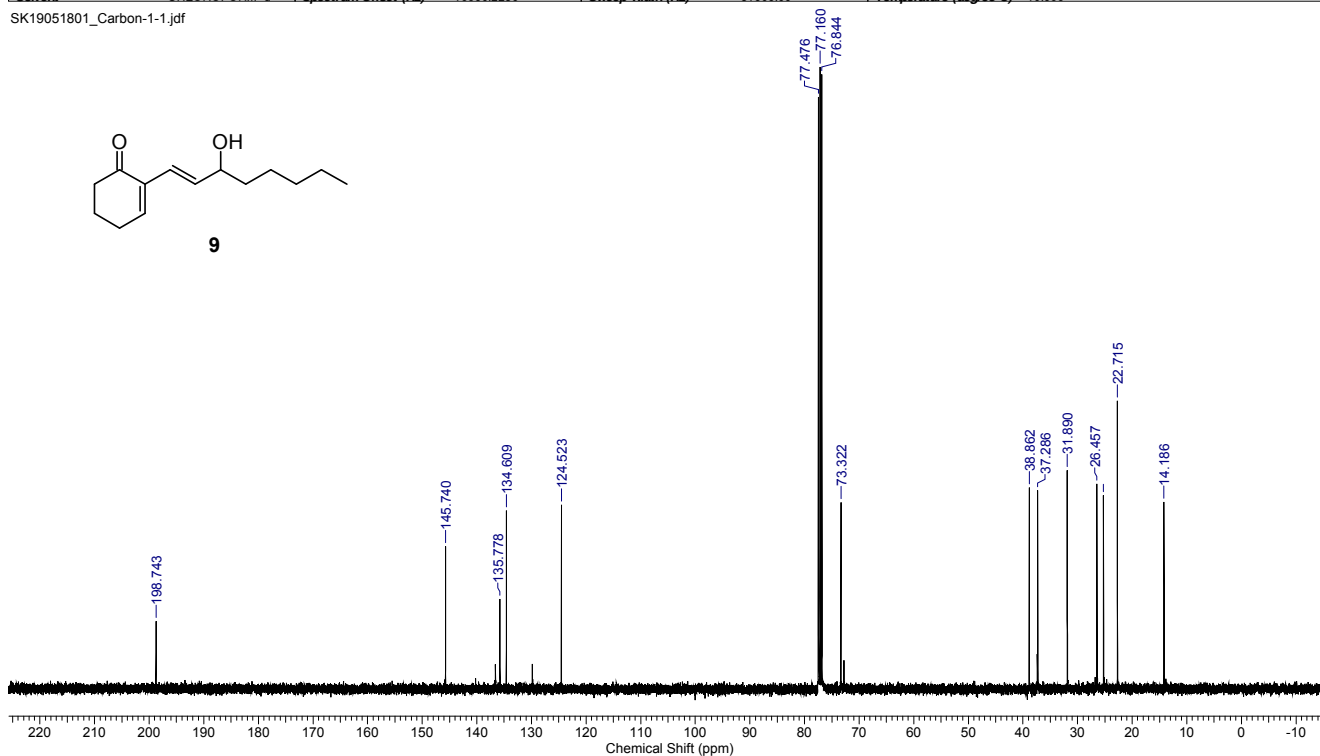





|                        |             |                |                                                                            |                        |                     |
|------------------------|-------------|----------------|----------------------------------------------------------------------------|------------------------|---------------------|
| Acquisition Time (sec) | 3.5561      | Comment        | STANDARD 1H OBSERVE                                                        | Date                   | Jun 30 2017         |
| Date Stamp             | Jun 30 2017 | File Name      | YYMac\Cloud\Yamamura\2017NMR\KY2017NMR\Agilent\Yamamura\TT17063002.fid\fid | Frequency (MHz)        | 300.05              |
| Frequency (MHz)        | 300.05      | Nucleus        | 1H                                                                         | Number of Transients   | 4                   |
| Points Count           | 65536       | Pulse Sequence | s2pul                                                                      | Receiver Gain          | 18.00               |
| Spectrum Offset (Hz)   | 1698.5983   | Spectrum Type  | STANDARD                                                                   | Sweep Width (Hz)       | 4803.07             |
|                        |             |                |                                                                            | Solvent                | CHLOROFORM-d        |
|                        |             |                |                                                                            | Temperature (degree C) | AMBIENT TEMPERATURE |

16-H.esp

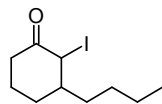

11 (dr = 1.6:1)

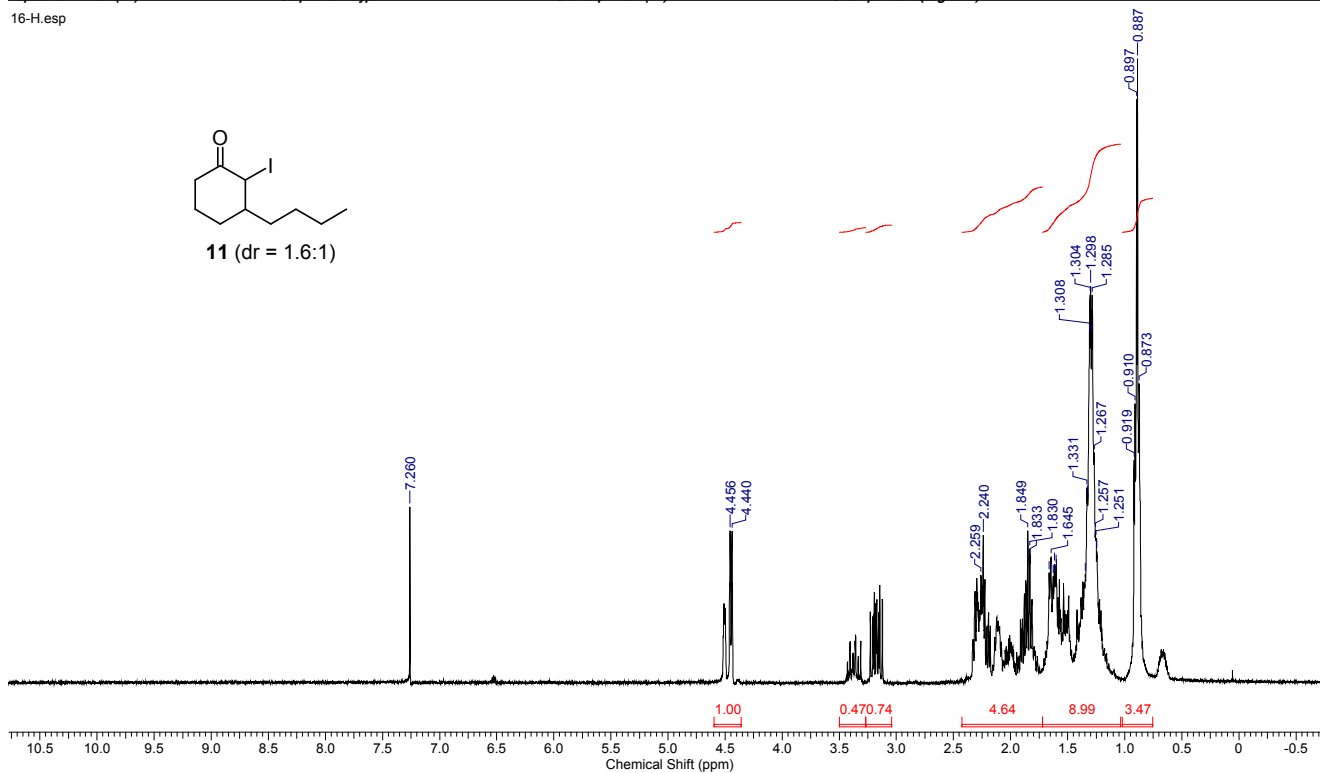

|                        |             |                |                                                                              |                        |                     |
|------------------------|-------------|----------------|------------------------------------------------------------------------------|------------------------|---------------------|
| Acquisition Time (sec) | 0.8527      | Comment        | c13-NMR                                                                      | Date                   | Jun 30 2017         |
| Date Stamp             | Jun 30 2017 | File Name      | YYMac\Cloud\Yamamura\2017NMR\KY2017NMR\Agilent\Yamamura\TT17063002.C.fid\fid | Frequency (MHz)        | 75.46               |
| Frequency (MHz)        | 75.46       | Nucleus        | 13C                                                                          | Number of Transients   | 672                 |
| Points Count           | 65536       | Pulse Sequence | s2pul                                                                        | Receiver Gain          | 30.00               |
| Spectrum Offset (Hz)   | 8954.8730   | Spectrum Type  | STANDARD                                                                     | Sweep Width (Hz)       | 22675.74            |
|                        |             |                |                                                                              | Solvent                | CHLOROFORM-d        |
|                        |             |                |                                                                              | Temperature (degree C) | AMBIENT TEMPERATURE |

16-C.esp

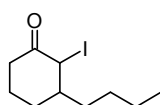

11 (dr = 1.6:1)

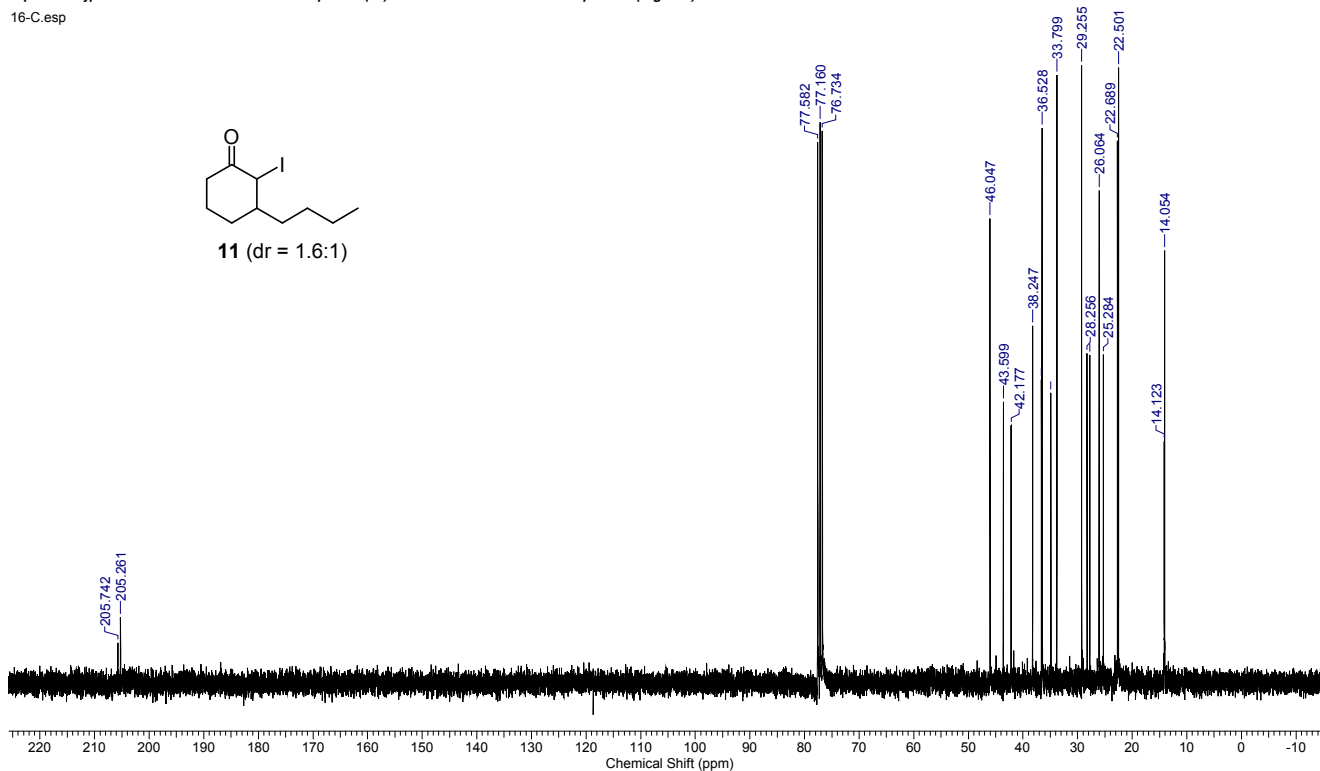

|                        |                                                                                     |                      |                |                        |                      |
|------------------------|-------------------------------------------------------------------------------------|----------------------|----------------|------------------------|----------------------|
| Acquisition Time (sec) | 2.1863                                                                              | Comment              | single pulse   | Date                   | 18 May 2019 12:01:26 |
| Date Stamp             | 18 May 2019 12:00:35                                                                |                      |                |                        |                      |
| File Name              | Y:\Mac\Cloud\Y:\NMR\2019\NMR KY2019\NMR(JEOL)\Y:\NMR\2019\SK19051803 Proton-1-1.jdf |                      |                |                        |                      |
| Frequency (MHz)        | 399.78                                                                              | Nucleus              | <sup>1</sup> H | Number of Transients   | 8                    |
| Original Points Count  | 16384                                                                               | Owner                | delta          | Points Count           | 32768                |
| Solvent                | CHLOROFORM-d                                                                        | Spectrum Offset (Hz) | 1999.8311      | Sweep Width (Hz)       | 7494.00              |
|                        |                                                                                     |                      |                | Origin                 | ECA                  |
|                        |                                                                                     |                      |                | Pulse Sequence         | proton1xp            |
|                        |                                                                                     |                      |                | Temperature (degree C) | 19.800               |

SK19051803\_Proton-1-1.jdf

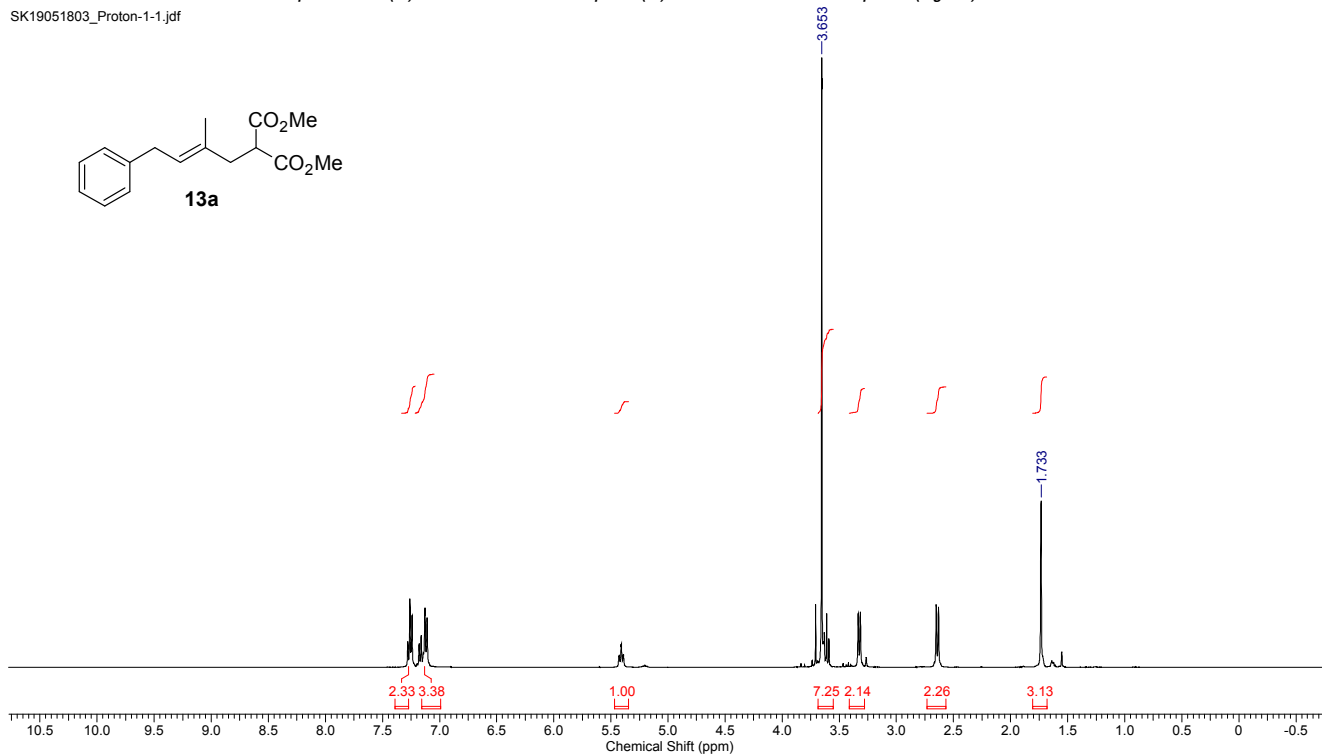

|                        |                                                                                     |                      |                                  |                        |                      |
|------------------------|-------------------------------------------------------------------------------------|----------------------|----------------------------------|------------------------|----------------------|
| Acquisition Time (sec) | 1.0381                                                                              | Comment              | single pulse decoupled gated NOE | Date                   | 18 May 2019 12:43:20 |
| Date Stamp             | 18 May 2019 12:03:48                                                                |                      |                                  |                        |                      |
| File Name              | Y:\Mac\Cloud\Y:\NMR\2019\NMR KY2019\NMR(JEOL)\Y:\NMR\2019\SK19051803 Carbon-1-1.jdf |                      |                                  |                        |                      |
| Frequency (MHz)        | 100.53                                                                              | Nucleus              | <sup>13</sup> C                  | Number of Transients   | 1024                 |
| Original Points Count  | 32768                                                                               | Owner                | delta                            | Points Count           | 65536                |
| Solvent                | CHLOROFORM-d                                                                        | Spectrum Offset (Hz) | 10053.8154                       | Sweep Width (Hz)       | 31565.66             |
|                        |                                                                                     |                      |                                  | Origin                 | ECA                  |
|                        |                                                                                     |                      |                                  | Pulse Sequence         | carbon1xp            |
|                        |                                                                                     |                      |                                  | Temperature (degree C) | 19.600               |

SK19051803\_Carbon-1-1.jdf

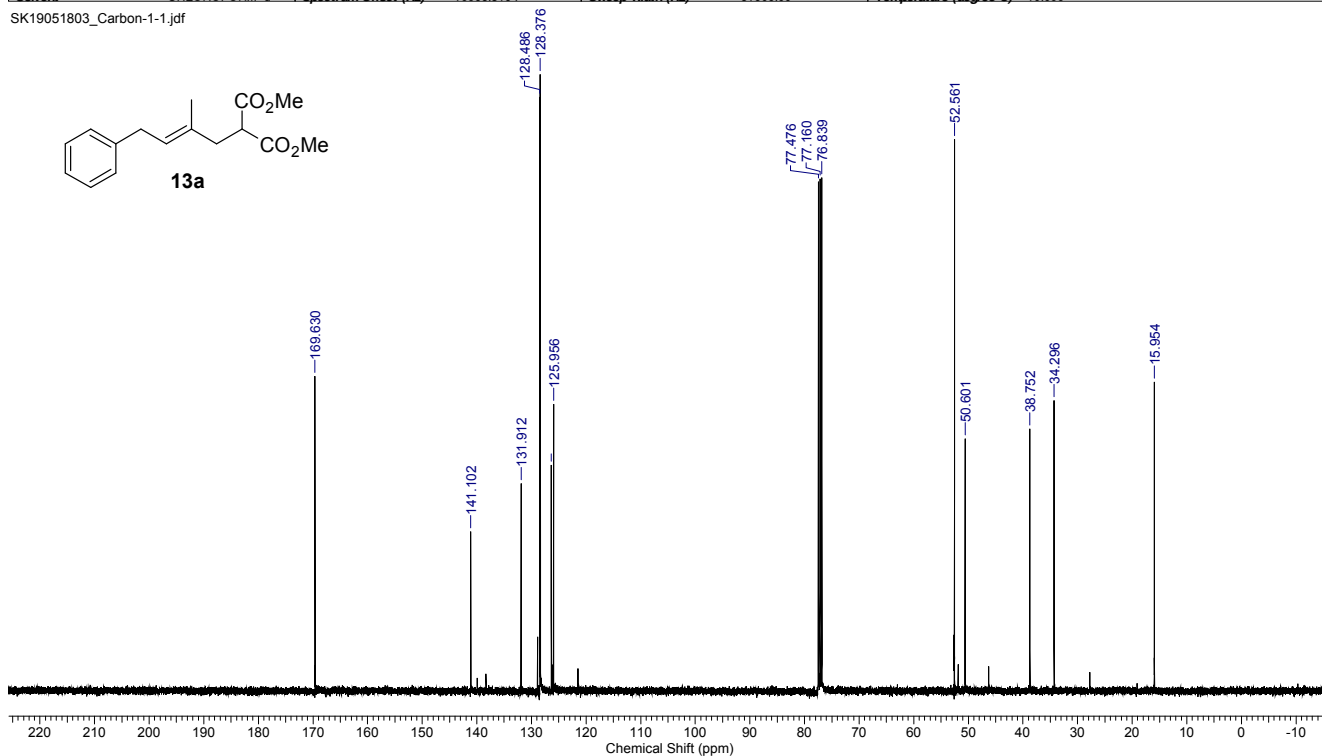

|                        |                                                                             |                      |              |                        |                      |
|------------------------|-----------------------------------------------------------------------------|----------------------|--------------|------------------------|----------------------|
| Acquisition Time (sec) | 2.1863                                                                      | Comment              | single_pulse | Date                   | 27 Oct 2017 13:42:46 |
| Date Stamp             | 27 Oct 2017 13:41:55                                                        |                      |              |                        |                      |
| File Name              | \\Mac\Cloud\jmm\mnmr\2017\NMR KV2017\NMR(JEOL)\9元\TT17102701_Proton-1-1.jdf |                      |              | Frequency (MHz)        | 399.78               |
| Nucleus                | <sup>1</sup> H                                                              | Number of Transients | 8            | Origin                 | ECA                  |
| Owner                  | delta                                                                       | Points Count         | 32768        | Pulse Sequence         | proton.jxp           |
| Spectrum Offset (Hz)   | 2003.4905                                                                   | Sweep Width (Hz)     | 7494.00      | Temperature (degree C) | 19.200               |
| Solvent                | CHLOROFORM-d                                                                |                      |              |                        |                      |

TT17102701\_Proton-1-1.jdf

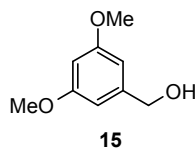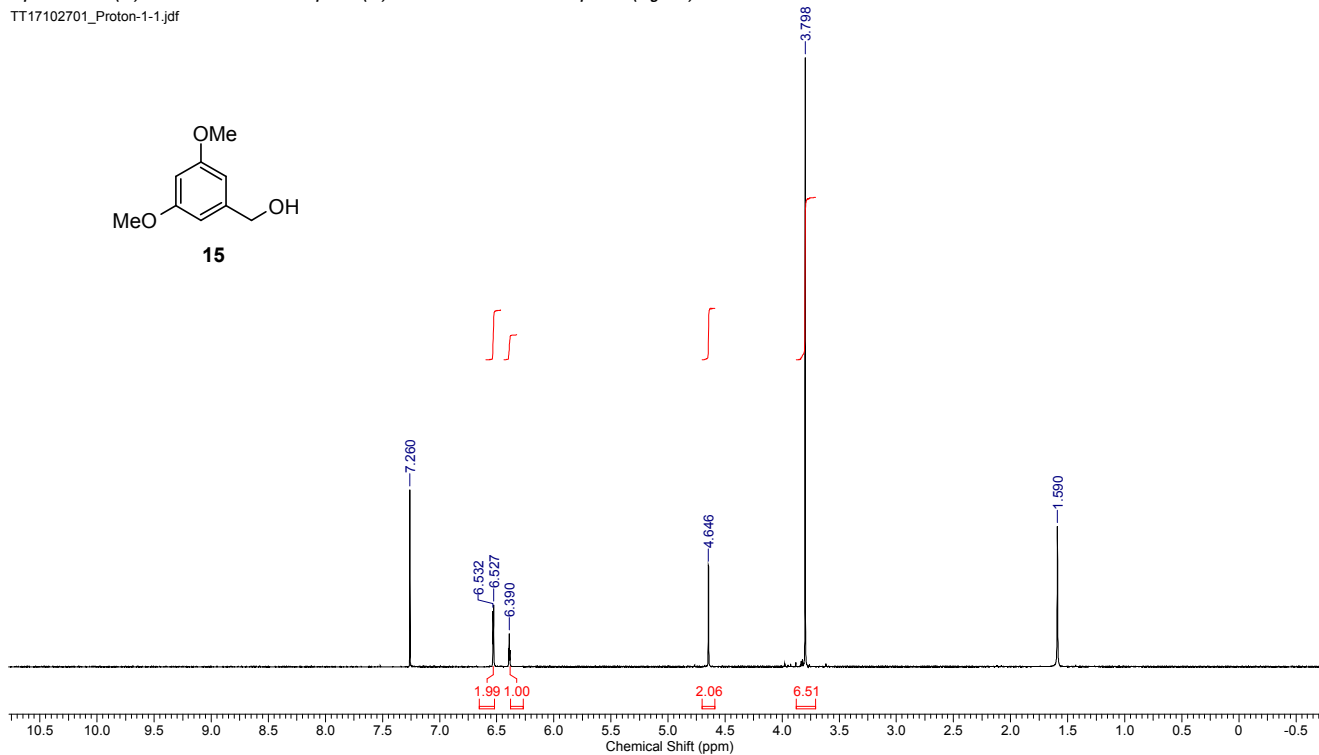

|                        |                                                            |                       |         |                      |             |                |                 |
|------------------------|------------------------------------------------------------|-----------------------|---------|----------------------|-------------|----------------|-----------------|
| Acquisition Time (sec) | 0.8527                                                     | Comment               | c13-NMR | Date                 | Mar 13 2019 | Date Stamp     | Mar 13 2019     |
| File Name              | \\Mac\Cloud\jmm\mnmr\2019\NMR KV\koba\SK19031302_C.fid\fid |                       |         | Frequency (MHz)      | 75.46       | Nucleus        | <sup>13</sup> C |
| Number of Transients   | 512                                                        | Original Points Count | 19335   | Points Count         | 65536       | Pulse Sequence | s2pul           |
| Solvent                | CHLOROFORM-d                                               |                       |         | Spectrum Offset (Hz) | 8956.6035   | Spectrum Type  | STANDARD        |
| Temperature (degree C) | AMBIENT TEMPERATURE                                        |                       |         | Sweep Width (Hz)     | 22675.74    | Receiver Gain  | 30.00           |

SK19031302\_C

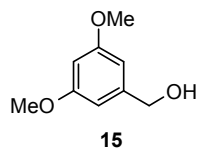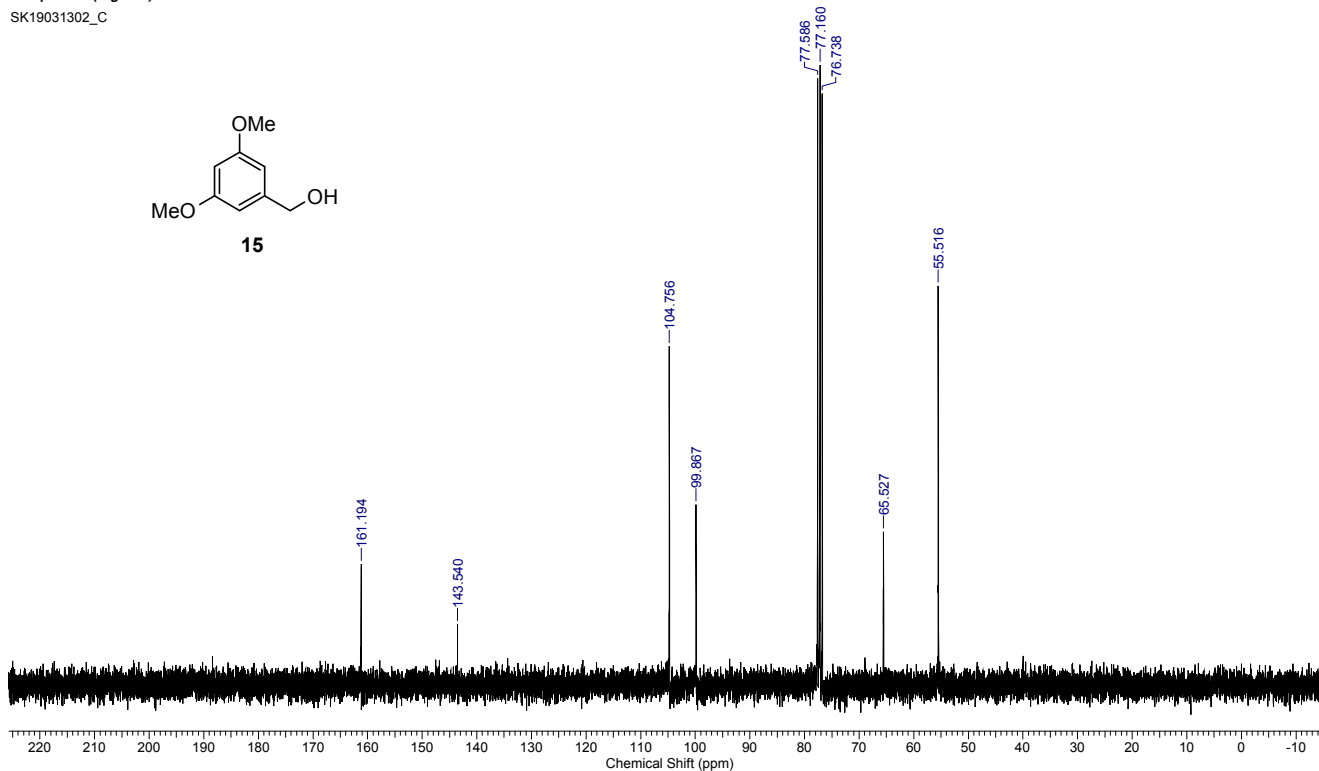

|                        |             |                |                                                           |                        |                     |
|------------------------|-------------|----------------|-----------------------------------------------------------|------------------------|---------------------|
| Acquisition Time (sec) | 3.5561      | Comment        | STANDARD 1H OBSERVE                                       | Date                   | Mar 13 2019         |
| Date Stamp             | Mar 13 2019 | File Name      | YYMac\iCloud\Y\mmmmmm\NMR\2019\NMR KV\koba\SK19031303.fid | Original Points Count  | 17080               |
| Frequency (MHz)        | 300.05      | Nucleus        | 1H                                                        | Number of Transients   | 16                  |
| Points Count           | 65536       | Pulse Sequence | s2pul                                                     | Receiver Gain          | 16.00               |
| Spectrum Offset (Hz)   | 1699.2579   | Spectrum Type  | STANDARD                                                  | Sweep Width (Hz)       | 4803.07             |
|                        |             |                |                                                           | Solvent                | CHLOROFORM-d        |
|                        |             |                |                                                           | Temperature (degree C) | AMBIENT TEMPERATURE |

SK19031303

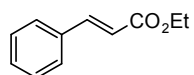

17

E/Z = 10:1

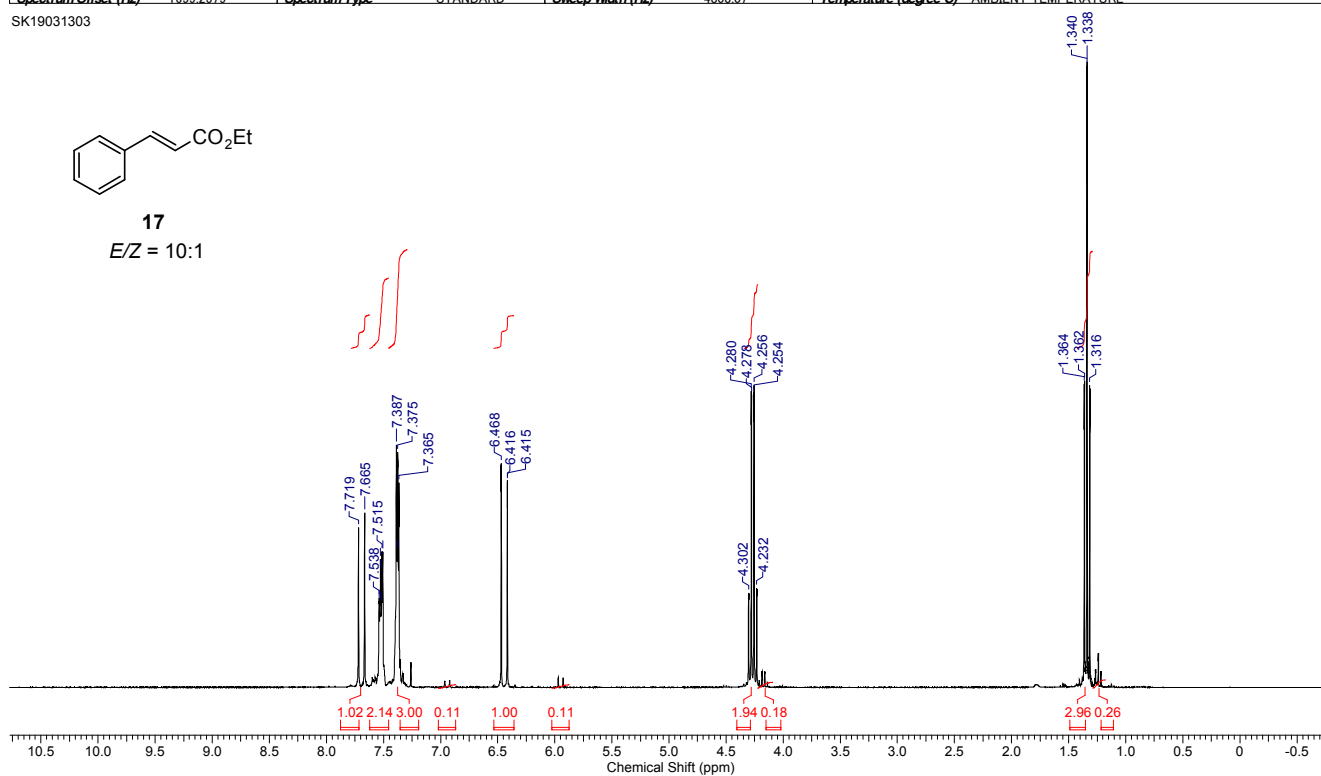

|                        |                                                             |                        |                     |                      |             |                  |             |
|------------------------|-------------------------------------------------------------|------------------------|---------------------|----------------------|-------------|------------------|-------------|
| Acquisition Time (sec) | 0.8527                                                      | Comment                | c13-NMR             | Date                 | Mar 13 2019 | Date Stamp       | Mar 13 2019 |
| File Name              | YYMac\iCloud\Y\mmmmmm\NMR\2019\NMR KV\koba\SK19031303_C.fid | Original Points Count  | 19335               | Points Count         | 65536       | Frequency (MHz)  | 75.46       |
| Number of Transients   | 128                                                         | Solvent                | CHLOROFORM-d        | Spectrum Offset (Hz) | 8952.7979   | Pulse Sequence   | s2pul       |
|                        |                                                             | Temperature (degree C) | AMBIENT TEMPERATURE |                      |             | Receiver Gain    | 30.00       |
|                        |                                                             |                        |                     |                      |             | Sweep Width (Hz) | 22675.74    |

SK19031303\_C

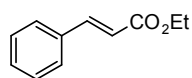

17

E/Z = 10:1

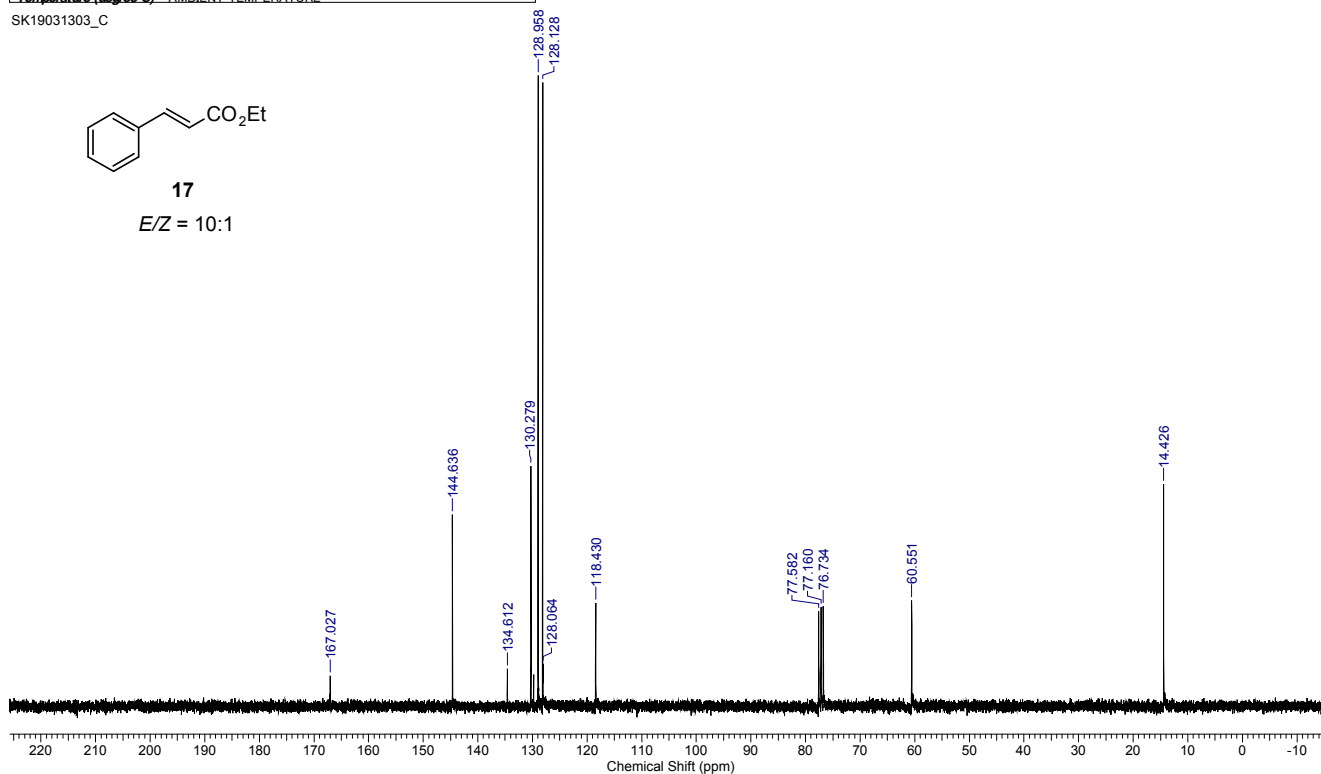

|                        |                                                                               |                      |              |                        |                      |
|------------------------|-------------------------------------------------------------------------------|----------------------|--------------|------------------------|----------------------|
| Acquisition Time (sec) | 2.1863                                                                        | Comment              | single_pulse | Date                   | 16 Jun 2017 09:17:57 |
| Date Stamp             | 16 Jun 2017 09:17:05                                                          |                      |              |                        |                      |
| File Name              | \\YMac\Cloud\Y2018\NMR\2017\NMR KY2017\NMR(JEOL)\元元\TT17061601_Proton-1-1.jdf |                      |              |                        |                      |
| Nucleus                | <sup>1</sup> H                                                                | Number of Transients | 8            | Origin                 | ECA                  |
| Owner                  | delta                                                                         | Points Count         | 32768        | Pulse Sequence         | proton.jxp           |
| Spectrum Offset (Hz)   | 2003.4905                                                                     | Sweep Width (Hz)     | 7494.00      | Solvent                | CHLOROFORM-d         |
|                        |                                                                               |                      |              | Temperature (degree C) | 21.300               |

TT17061601\_Proton-1-1.jdf

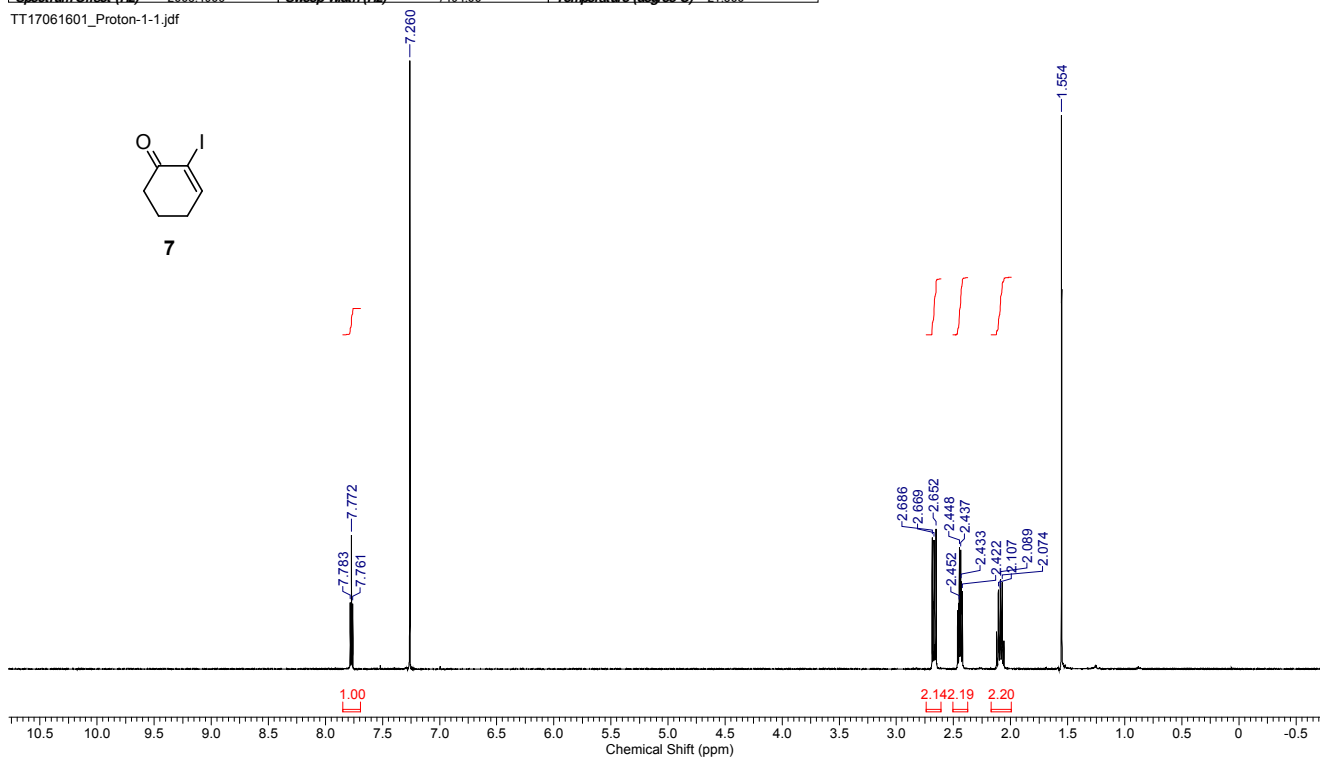

|                        |                                                                                       |                      |                                  |                        |                      |
|------------------------|---------------------------------------------------------------------------------------|----------------------|----------------------------------|------------------------|----------------------|
| Acquisition Time (sec) | 1.0381                                                                                | Comment              | single pulse decoupled gated NOE | Date                   | 22 Jan 2019 12:38:09 |
| Date Stamp             | 22 Jan 2019 11:58:38                                                                  |                      |                                  |                        |                      |
| File Name              | \\YMac\Cloud\Y2018\NMR\2018\NMR KY2018\NMR(JEOL)\元元\NMR2018\TT19012204_Carbon-1-1.jdf |                      |                                  |                        |                      |
| Frequency (MHz)        | 100.53                                                                                | Nucleus              | <sup>13</sup> C                  | Number of Transients   | 1024                 |
| Owner                  | delta                                                                                 | Points Count         | 65536                            | Pulse Sequence         | carbon.jxp           |
| Solvent                | CHLOROFORM-d                                                                          | Spectrum Offset (Hz) | 10054.2969                       | Sweep Width (Hz)       | 31565.66             |
|                        |                                                                                       |                      |                                  | Temperature (degree C) | 20.000               |

TT19012204\_Carbon-1-1.jdf

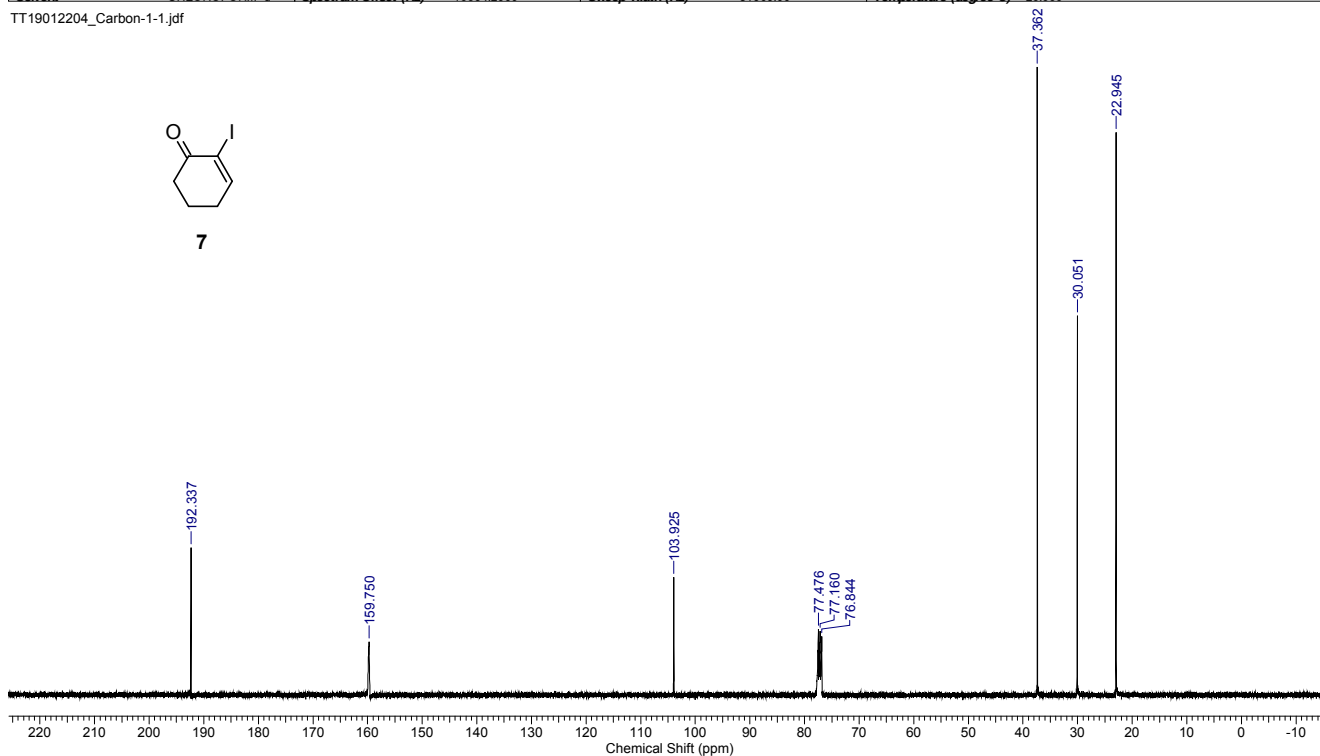



|                        |             |                |                                                                                         |                        |                     |
|------------------------|-------------|----------------|-----------------------------------------------------------------------------------------|------------------------|---------------------|
| Acquisition Time (sec) | 3.5561      | Comment        | STANDARD 1H OBSERVE                                                                     | Date                   | Jun 28 2019         |
| Date Stamp             | Jun 28 2019 | File Name      | Y:\Mac\Cloud\Y_HHHHH\NMR_#_HHF_HH_H\#2019NMR_KY2019NMR(agilent)\koba\SK19062802.fid\fid | Original Points Count  | 17080               |
| Frequency (MHz)        | 300.05      | Nucleus        | 1H                                                                                      | Number of Transients   | 2                   |
| Points Count           | 65536       | Pulse Sequence | s2pul                                                                                   | Receiver Gain          | 16.00               |
| Spectrum Offset (Hz)   | 1698.8182   | Spectrum Type  | STANDARD                                                                                | Sweep Width (Hz)       | 4803.07             |
|                        |             |                |                                                                                         | Solvent                | CHLOROFORM-d        |
|                        |             |                |                                                                                         | Temperature (degree C) | AMBIENT TEMPERATURE |

SK19062802

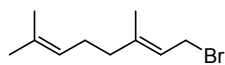

22

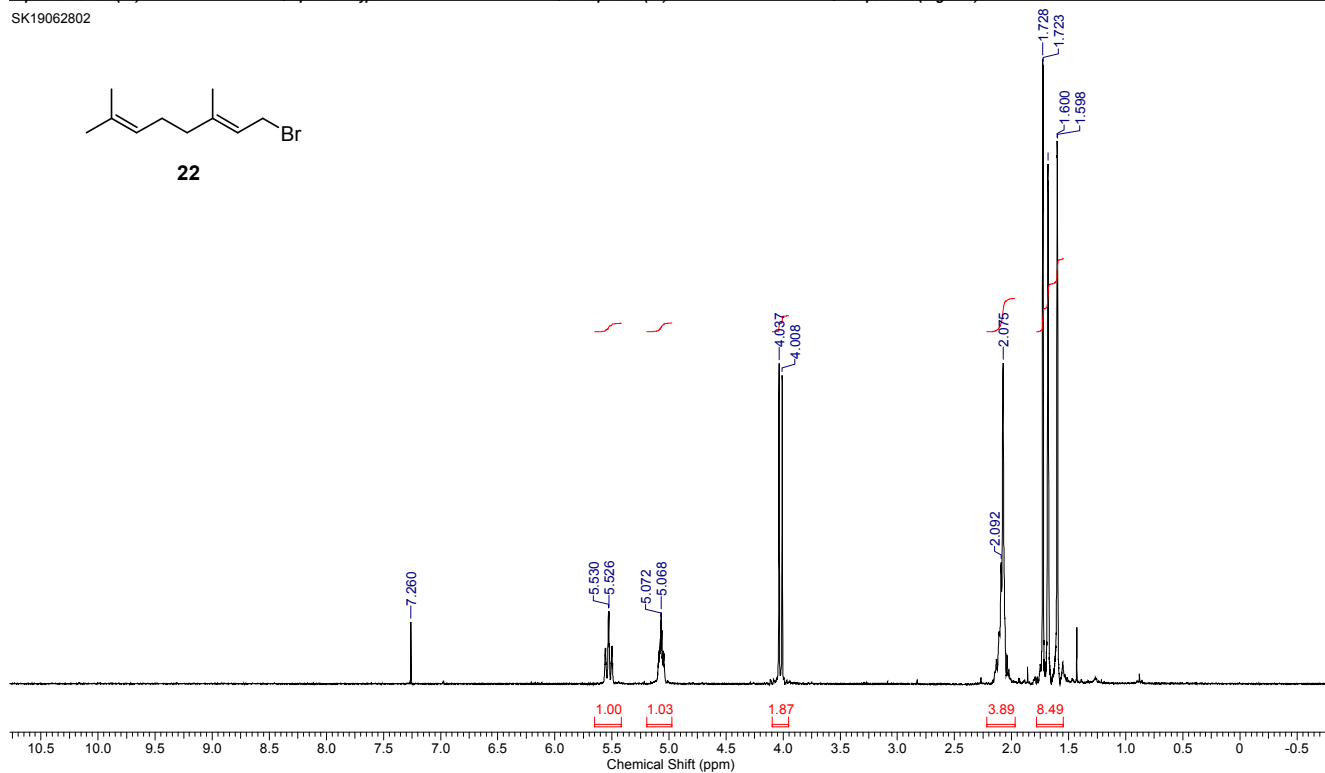

|                        |             |                |                                                                                           |                        |                     |
|------------------------|-------------|----------------|-------------------------------------------------------------------------------------------|------------------------|---------------------|
| Acquisition Time (sec) | 0.8527      | Comment        | c13-NMR                                                                                   | Date                   | Jun 28 2019         |
| Date Stamp             | Jun 28 2019 | File Name      | Y:\Mac\Cloud\Y_HHHHH\NMR_#_HHF_HH_H\#2019NMR_KY2019NMR(agilent)\koba\SK19062802_C.fid\fid | Original Points Count  | 19335               |
| Frequency (MHz)        | 75.46       | Nucleus        | 13C                                                                                       | Number of Transients   | 256                 |
| Points Count           | 65536       | Pulse Sequence | s2pul                                                                                     | Receiver Gain          | 30.00               |
| Spectrum Offset (Hz)   | 8957.2949   | Spectrum Type  | STANDARD                                                                                  | Sweep Width (Hz)       | 22675.74            |
|                        |             |                |                                                                                           | Solvent                | CHLOROFORM-d        |
|                        |             |                |                                                                                           | Temperature (degree C) | AMBIENT TEMPERATURE |

SK19062802\_C

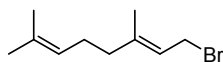

22

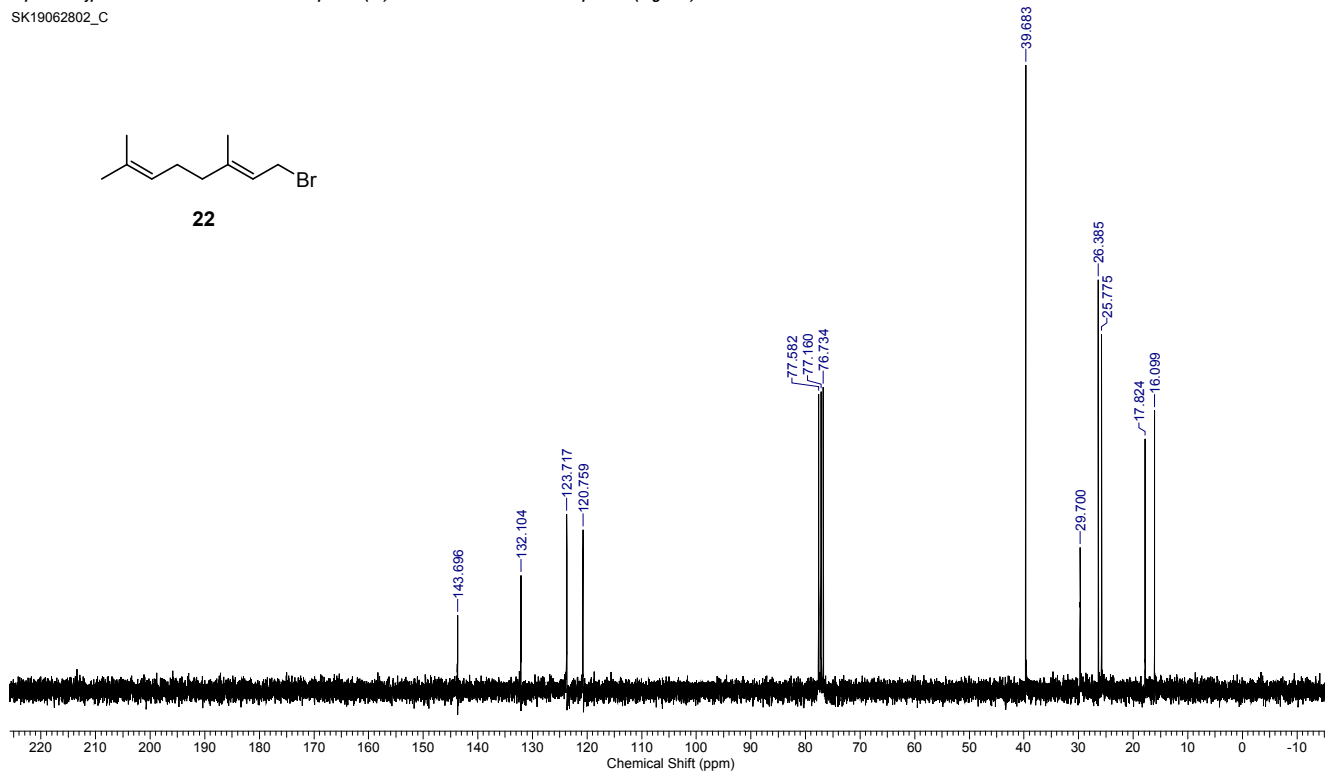

| Acquisition Time (sec) | 2.1863                                                                                          | Comment              | single pulse   | Date                   | 17 Jul 2018 08:14:45 |
|------------------------|-------------------------------------------------------------------------------------------------|----------------------|----------------|------------------------|----------------------|
| Date Stamp             | 17 Jul 2018 08:13:54                                                                            |                      |                |                        |                      |
| File Name              | YMac%Cloud%HHHHHNMNR.F.HF.H.H.HV2018NMNR.KV2018NMNR(JEOL).Y.HHNMNR2018TK18071701.Proton-1-1.jdf |                      |                |                        |                      |
| Frequency (MHz)        | 399.78                                                                                          | Nucleus              | <sup>1</sup> H | Number of Transients   | 8                    |
| Original Points Count  | 16384                                                                                           | Owner                | delta          | Points Count           | 32768                |
| Solvent                | CHLOROFORM-d                                                                                    | Spectrum Offset (Hz) | 2003.7192      | Sweep Width (Hz)       | 7494.00              |
|                        |                                                                                                 |                      |                | Temperature (degree C) | 24.300               |

TK18071701\_Proton-1-1.jdf

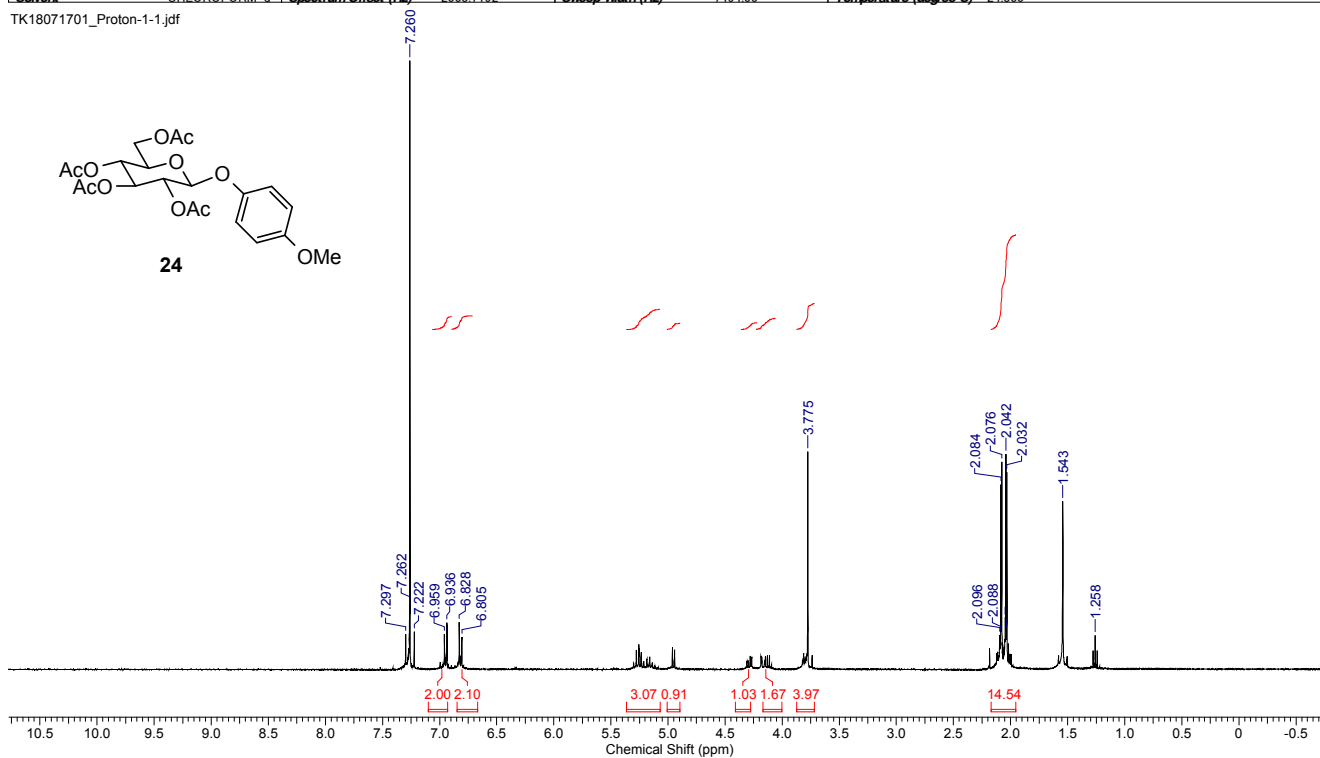

| Acquisition Time (sec) | 0.8527                                                                             | Comment              | c13-NMR  | Date                   | May 14 2019         | Date Stamp           | May 14 2019 |
|------------------------|------------------------------------------------------------------------------------|----------------------|----------|------------------------|---------------------|----------------------|-------------|
| File Name              | YMac%Cloud%HHHHHNMNR.F.HF.H.H.HV2019NMNR(Kasilent)YkoshishibaYMK19041103.C.fid.fid |                      |          |                        |                     |                      |             |
| Nucleus                | <sup>13</sup> C                                                                    | Number of Transients | 256      | Original Points Count  | 19335               | Points Count         | 65536       |
| Pulse Sequence         | s2pul                                                                              | Receiver Gain        | 30.00    | Solvent                | CHLOROFORM-d        | Spectrum Offset (Hz) | 8954.8730   |
| Spectrum Type          | STANDARD                                                                           | Sweep Width (Hz)     | 22675.74 | Temperature (degree C) | AMBIENT TEMPERATURE |                      |             |

MK19041103\_C

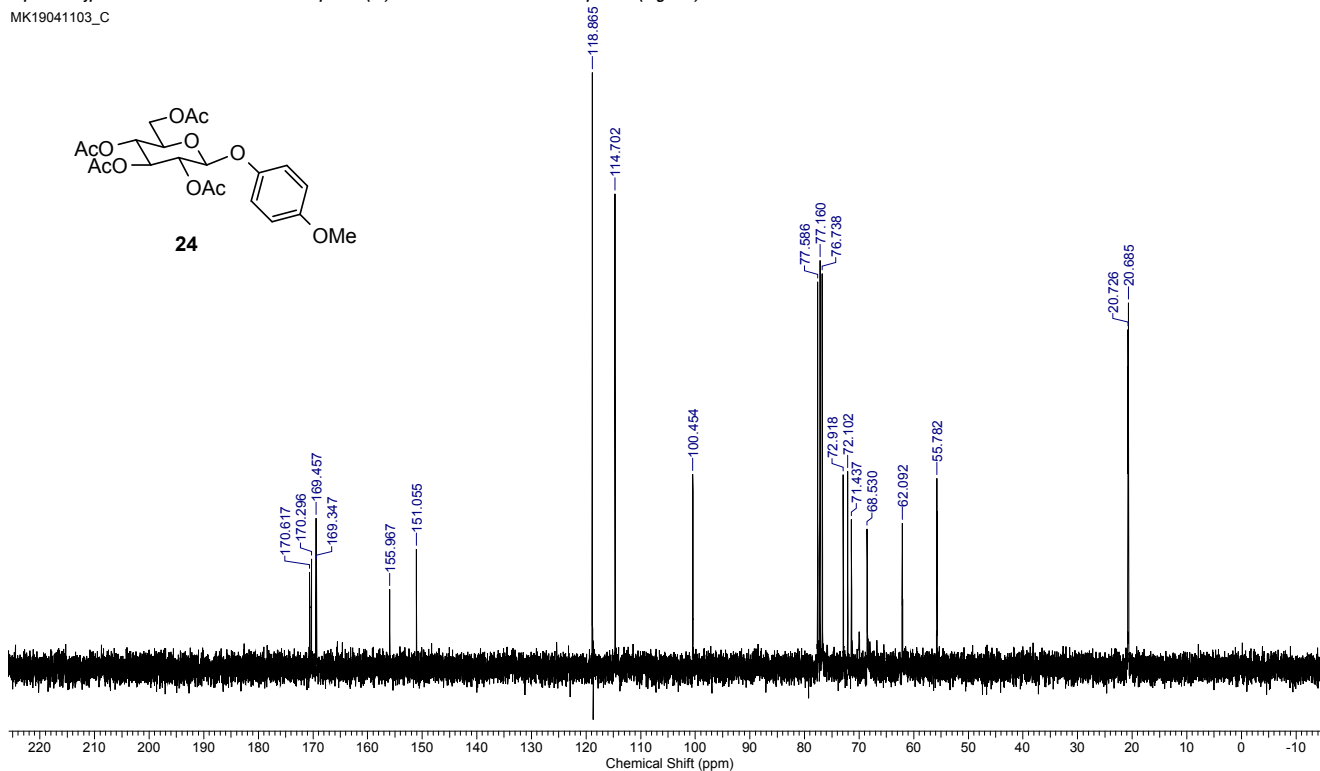



|                        |             |                |                                                                                  |                        |                     |
|------------------------|-------------|----------------|----------------------------------------------------------------------------------|------------------------|---------------------|
| Acquisition Time (sec) | 3.5561      | Comment        | STANDARD 1H OBSERVE                                                              | Date                   | Jul 12 2014         |
| Date Stamp             | Jul 12 2014 | File Name      | YY.PSFY.Home\Documents\Y_HHHHHH\NMR_F_HH_HH\Hy2014\NMR\yasumoto\14071201.fid\fid |                        |                     |
| Frequency (MHz)        | 300.06      | Nucleus        | 1H                                                                               | Number of Transients   | 16                  |
| Points Count           | 65536       | Pulse Sequence | s2pul                                                                            | Receiver Gain          | 16.00               |
| Spectrum Offset (Hz)   | 1698.6199   | Spectrum Type  | STANDARD                                                                         | Sweep Width (Hz)       | 4803.07             |
|                        |             |                |                                                                                  | Solvent                | CHLOROFORM-d        |
|                        |             |                |                                                                                  | Temperature (degree C) | AMBIENT TEMPERATURE |

14071201.esp

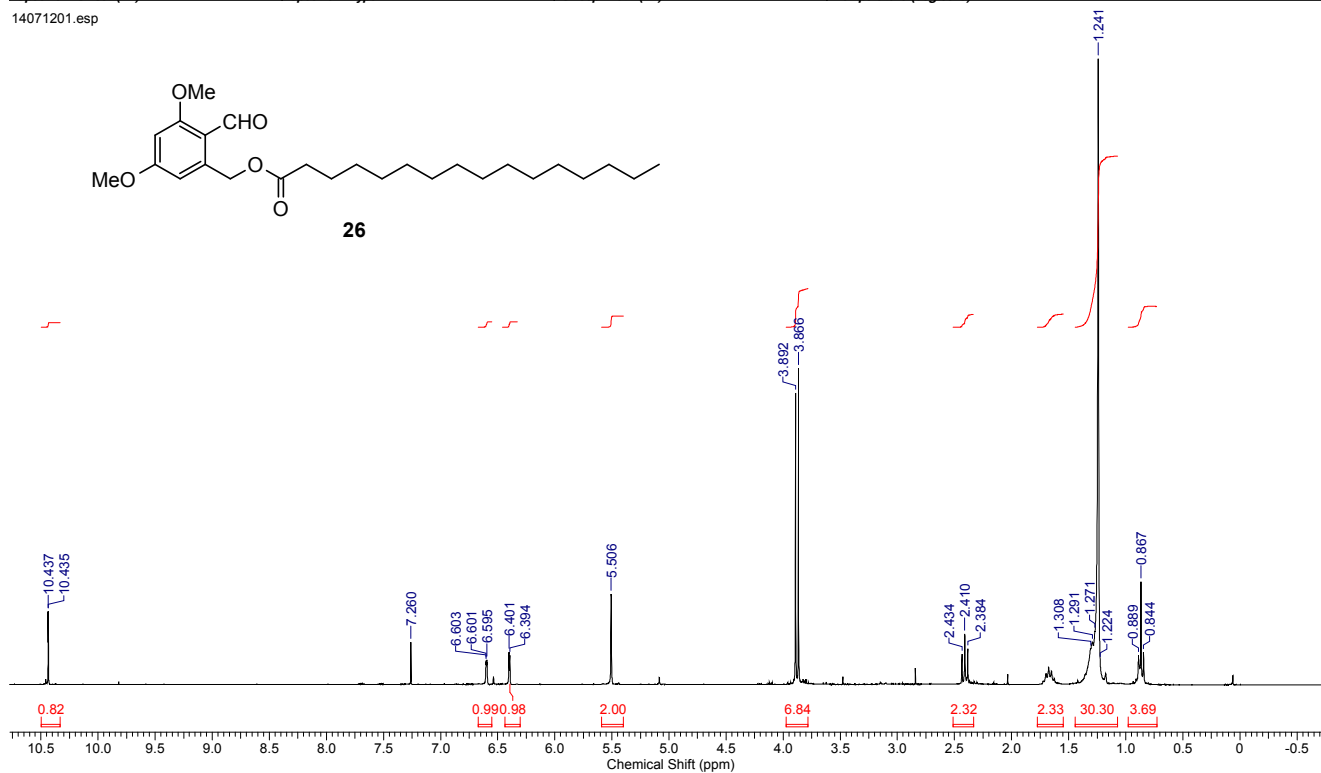

|                        |             |                |                                                                                    |                        |                     |
|------------------------|-------------|----------------|------------------------------------------------------------------------------------|------------------------|---------------------|
| Acquisition Time (sec) | 0.8527      | Comment        | c13-NMR                                                                            | Date                   | Jul 12 2014         |
| Date Stamp             | Jul 12 2014 | File Name      | YY.PSFY.Home\Documents\Y_HHHHHH\NMR_F_HH_HH\Hy2014\NMR\yasumoto\14071201.C.fid\fid | Date Stamp             | Jul 12 2014         |
| Frequency (MHz)        | 125.76      | Nucleus        | 13C                                                                                | Number of Transients   | 736                 |
| Points Count           | 65536       | Pulse Sequence | s2pul                                                                              | Receiver Gain          | 30.00               |
| Spectrum Offset (Hz)   | 8954.5850   | Spectrum Type  | STANDARD                                                                           | Sweep Width (Hz)       | 22875.74            |
|                        |             |                |                                                                                    | Solvent                | CHLOROFORM-d        |
|                        |             |                |                                                                                    | Temperature (degree C) | AMBIENT TEMPERATURE |

14071201\_C.esp

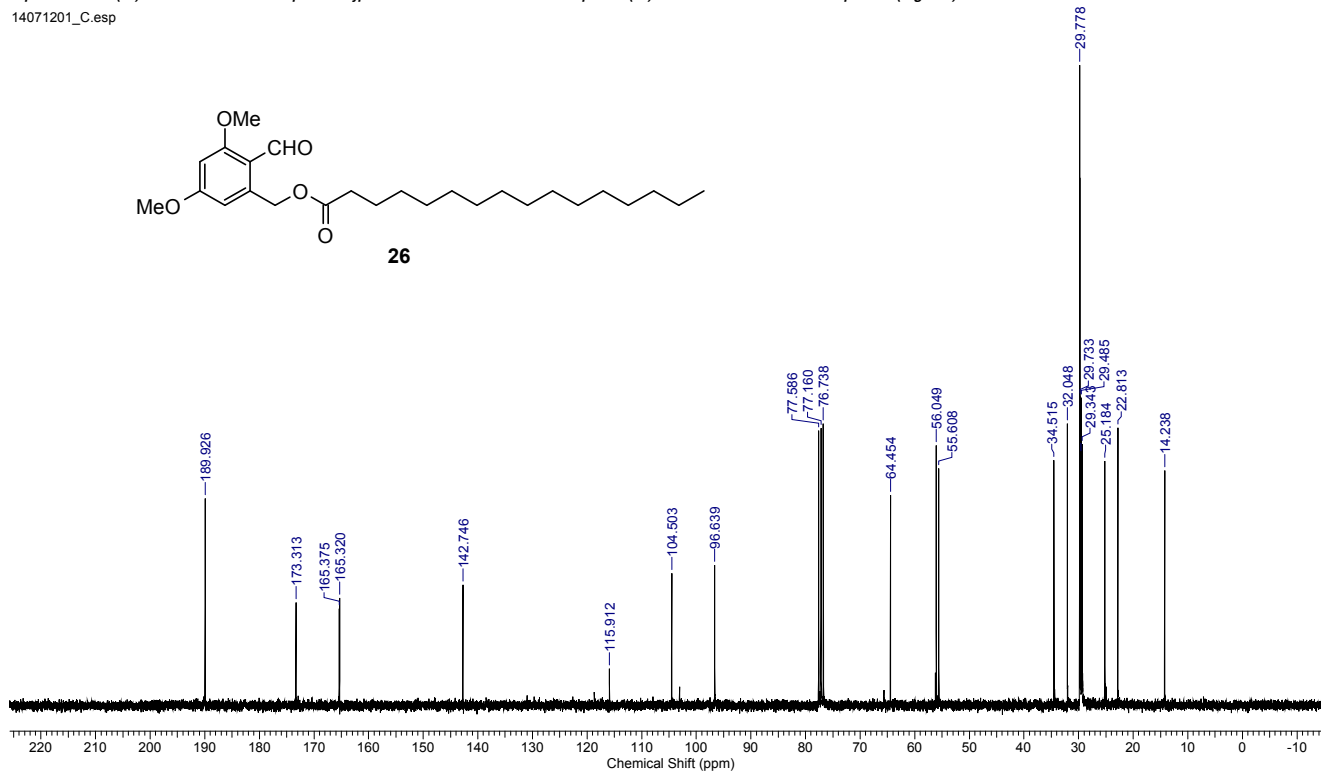



|                        |                                                                                                    |                      |              |                        |                      |
|------------------------|----------------------------------------------------------------------------------------------------|----------------------|--------------|------------------------|----------------------|
| Acquisition Time (sec) | 2.1863                                                                                             | Comment              | single_pulse | Date                   | 02 Nov 2017 12:17:42 |
| Date Stamp             | 02 Nov 2017 12:16:51                                                                               |                      |              |                        |                      |
| File Name              | YYMac\Cloud\H\H\H\H\H\NMR\F\H\H\H\H\H\N\2017\NMR\K\2017\NMR\JEOL\Y\h\H\T\T\17110201_Proton-1-1.jdf | Frequency (MHz)      | 399.78       |                        |                      |
| Nucleus                | <sup>1</sup> H                                                                                     | Number of Transients | 8            | Origin                 | ECA                  |
| Owner                  | delta                                                                                              | Points Count         | 32768        | Pulse Sequence         | protonjxp            |
| Spectrum Offset (Hz)   | 2003.4905                                                                                          | Sweep Width (Hz)     | 7494.00      | Temperature (degree C) | 18.700               |
|                        |                                                                                                    |                      |              | Solvent                | CHLOROFORM-d         |

TT17110201\_Proton-1-1.jdf

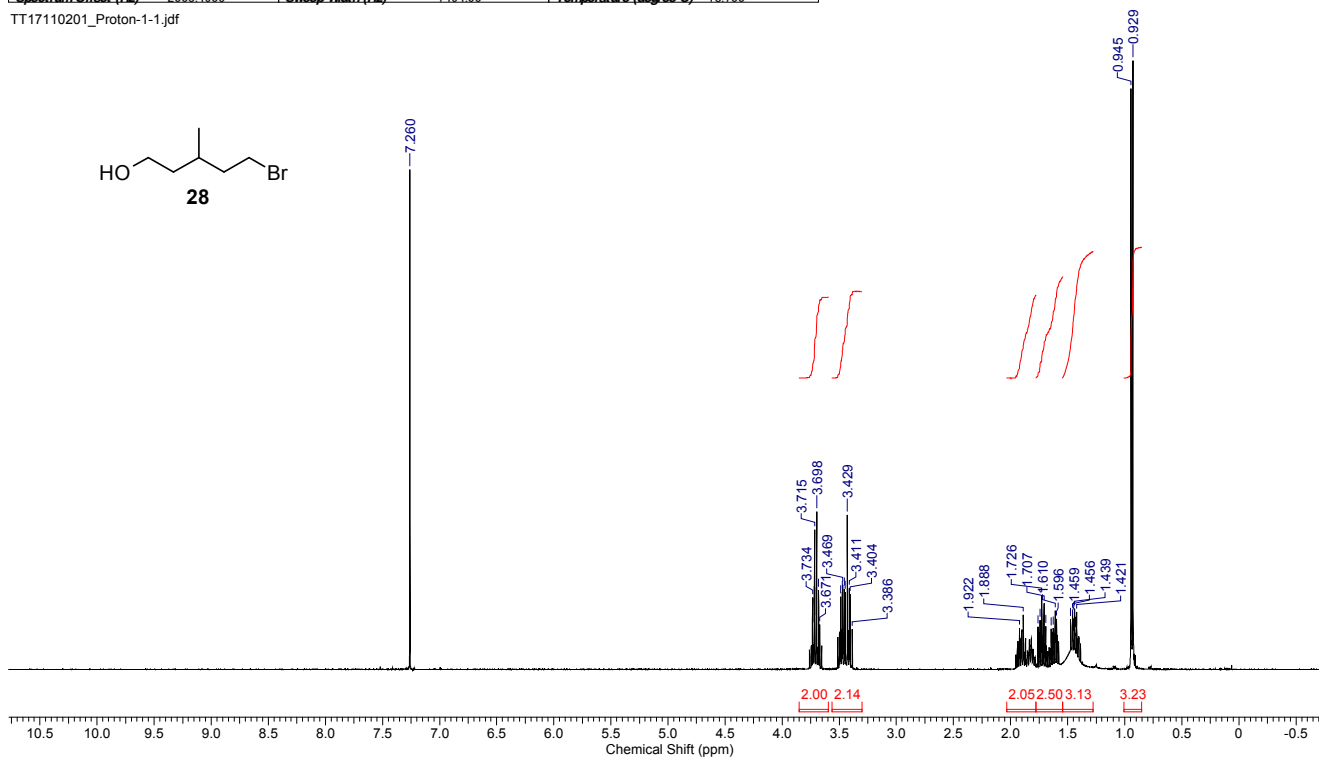

|                        |                                                                              |                       |           |               |                 |                  |             |
|------------------------|------------------------------------------------------------------------------|-----------------------|-----------|---------------|-----------------|------------------|-------------|
| Acquisition Time (sec) | 0.8527                                                                       | Comment               | c13-NMR   | Date          | Mar 12 2019     | Date Stamp       | Mar 12 2019 |
| File Name              | YYMac\Cloud\H\H\H\H\H\NMR\F\H\H\H\H\H\N\2019\NMR\K\koba\SK19031201_C.fid\fid | Frequency (MHz)       | 75.46     | Nucleus       | <sup>13</sup> C | Receiver Gain    | 30.00       |
| Number of Transients   | 192                                                                          | Original Points Count | 19335     | Points Count  | 65536           | Pulse Sequence   | s2pul       |
| Solvent                | CHLOROFORM-d                                                                 | Spectrum Offset (Hz)  | 8953.8359 | Spectrum Type | STANDARD        | Sweep Width (Hz) | 22675.74    |
| Temperature (degree C) | AMBIENT TEMPERATURE                                                          |                       |           |               |                 |                  |             |

SK19031201\_C

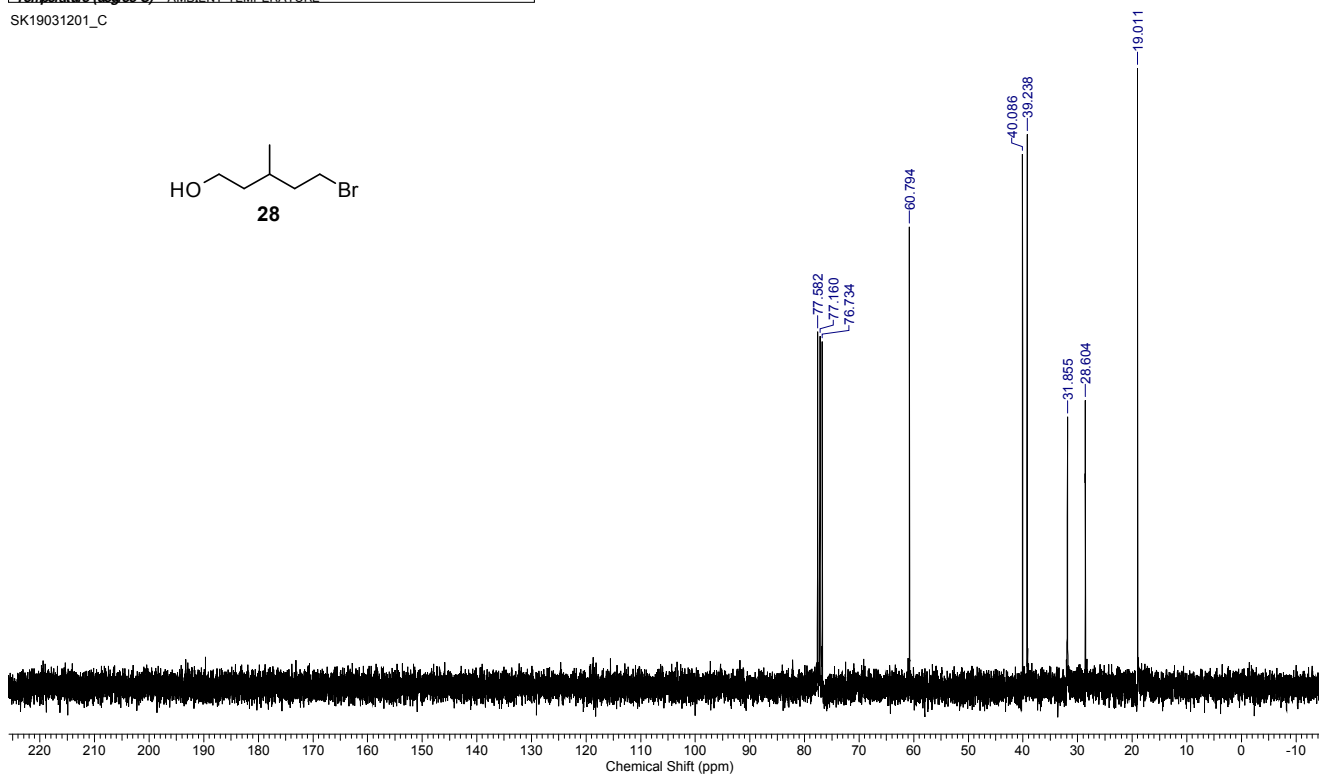

|                        |             |                |                                                                                       |                        |                     |
|------------------------|-------------|----------------|---------------------------------------------------------------------------------------|------------------------|---------------------|
| Acquisition Time (sec) | 3.5561      | Comment        | STANDARD 1H OBSERVE                                                                   | Date                   | Jul 31 2019         |
| Date Stamp             | Jul 31 2019 | File Name      | YMacYCloudY_HHHHHH19NMR_F_HH_HH_HH2019NMR_KV2019NMR(asilent)YkurodaYK19073101.fidYfid |                        |                     |
| Frequency (MHz)        | 300.05      | Nucleus        | 1H                                                                                    | Number of Transients   | 16                  |
| Points Count           | 65536       | Pulse Sequence | s2pul                                                                                 | Receiver Gain          | 34.00               |
| Spectrum Offset (Hz)   | 1605.9590   | Spectrum Type  | STANDARD                                                                              | Sweep Width (Hz)       | 4803.07             |
|                        |             |                |                                                                                       | Original Points Count  | 17080               |
|                        |             |                |                                                                                       | Solvent                | pyridine            |
|                        |             |                |                                                                                       | Temperature (degree C) | AMBIENT TEMPERATURE |

YK19073101

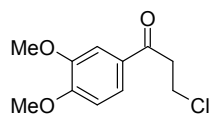

30

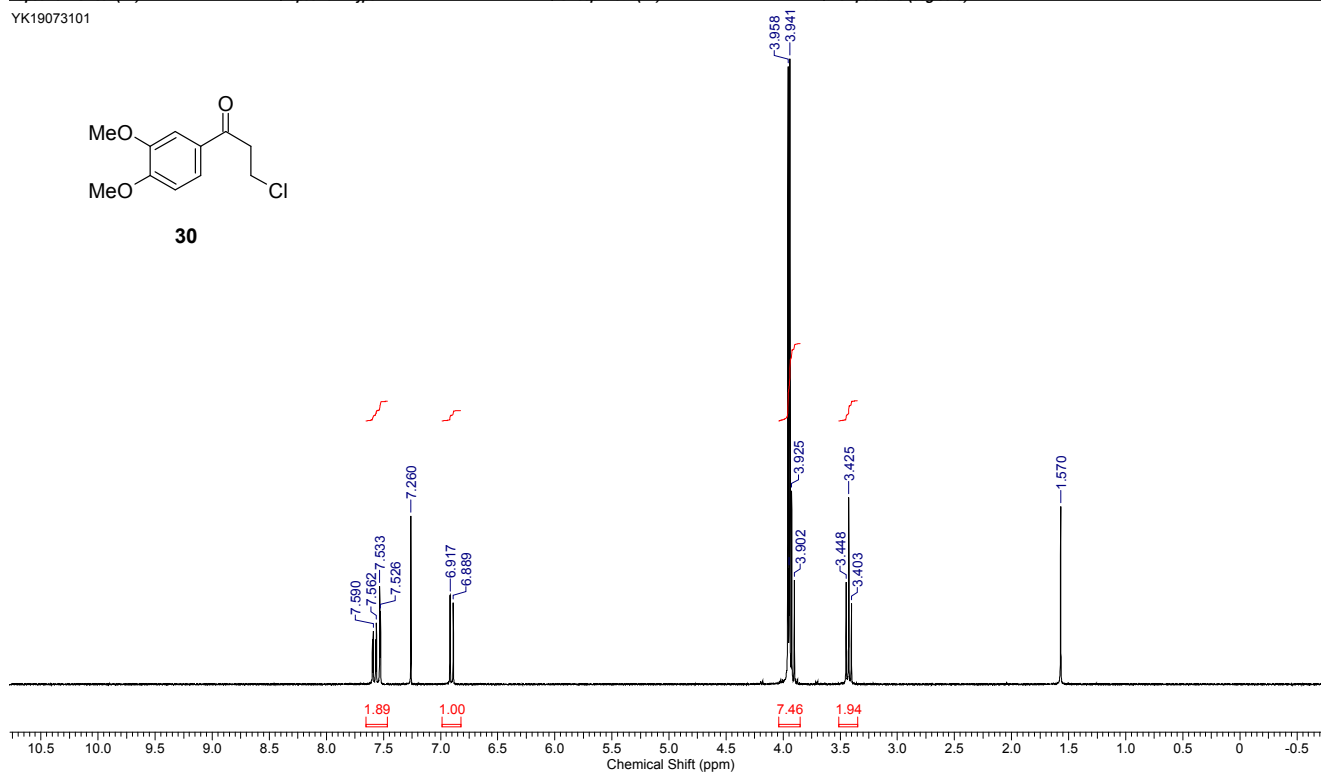

|                        |                                                                                         |                      |          |                        |                     |
|------------------------|-----------------------------------------------------------------------------------------|----------------------|----------|------------------------|---------------------|
| Acquisition Time (sec) | 0.8527                                                                                  | Comment              | c13-NMR  | Date                   | AUG 1 2019          |
| File Name              | YMacYCloudY_HHHHHH19NMR_F_HH_HH_HH2019NMR_KV2019NMR(asilent)YkurodaYK19080101_C.fidYfid |                      |          |                        |                     |
| Nucleus                | 13C                                                                                     | Number of Transients | 640      | Original Points Count  | 19335               |
| Pulse Sequence         | s2pul                                                                                   | Receiver Gain        | 30.00    | Solvent                | CHLOROFORM-d        |
| Spectrum Type          | STANDARD                                                                                | Sweep Width (Hz)     | 22675.74 | Temperature (degree C) | AMBIENT TEMPERATURE |
|                        |                                                                                         |                      |          | Points Count           | 65536               |
|                        |                                                                                         |                      |          | Frequency (MHz)        | 75.46               |
|                        |                                                                                         |                      |          | Spectrum Offset (Hz)   | 8955.5654           |

YK19080101\_C

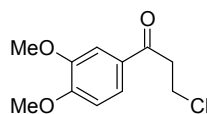

30

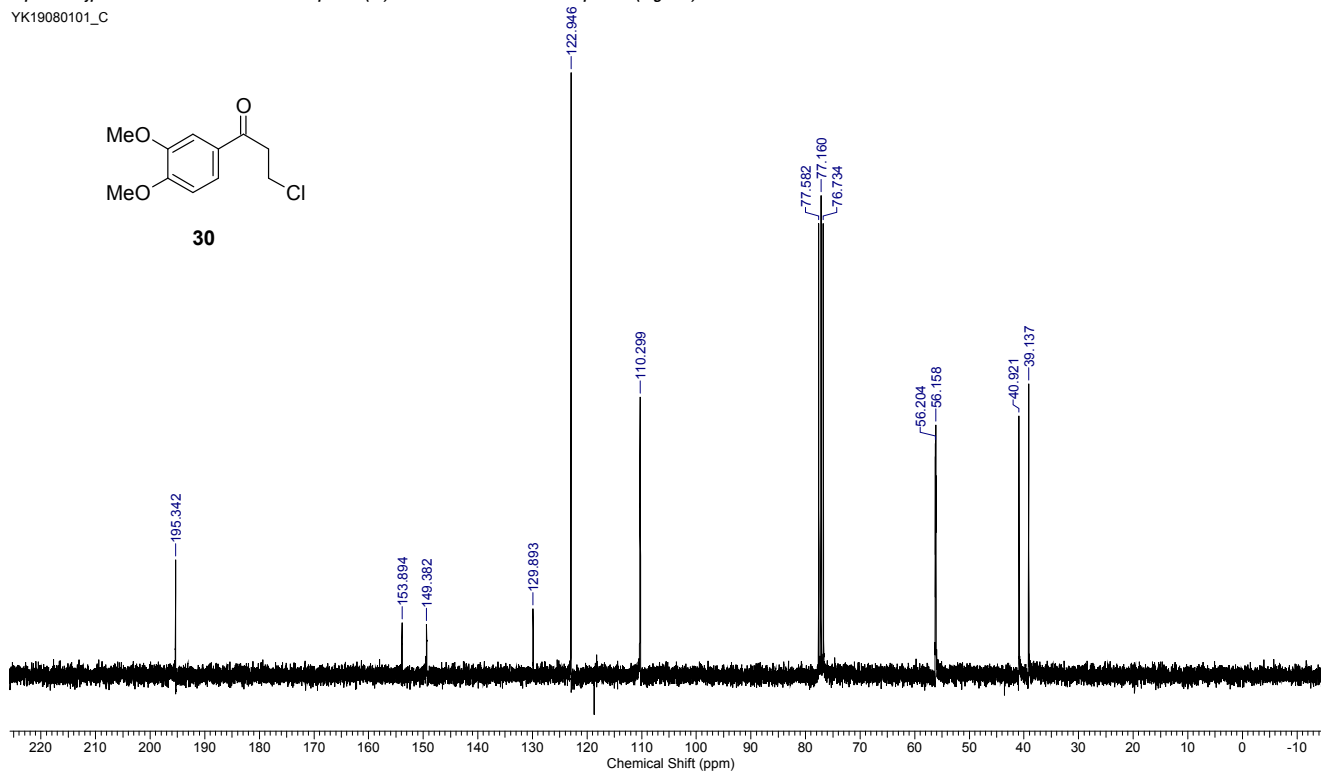

|                        |                                                                                                      |                      |                |                        |                      |
|------------------------|------------------------------------------------------------------------------------------------------|----------------------|----------------|------------------------|----------------------|
| Acquisition Time (sec) | 2.1863                                                                                               | Comment              | single pulse   | Date                   | 24 Oct 2018 09:43:15 |
| Date Stamp             | 24 Oct 2018 09:42:23                                                                                 |                      |                |                        |                      |
| File Name              | Y:\Mac\Cloud\H\H\H\H\H\NMR\F\H\H\H\H\H\NMR\K\K\2018\NMR\JEQ\Y\H\H\NMR\2018\TK18102402_Proton-1-1.jdf |                      |                |                        |                      |
| Frequency (MHz)        | 399.78                                                                                               | Nucleus              | <sup>1</sup> H | Number of Transients   | 8                    |
| Original Points Count  | 16384                                                                                                | Owner                | delta          | Points Count           | 32768                |
| Solvent                | CHLOROFORM-d                                                                                         | Spectrum Offset (Hz) | 2003.4905      | Sweep Width (Hz)       | 7494.00              |
|                        |                                                                                                      |                      |                | Origin                 | ECA                  |
|                        |                                                                                                      |                      |                | Pulse Sequence         | proton1xp            |
|                        |                                                                                                      |                      |                | Temperature (degree C) | 18.900               |

TK18102402\_Proton-1-1.jdf

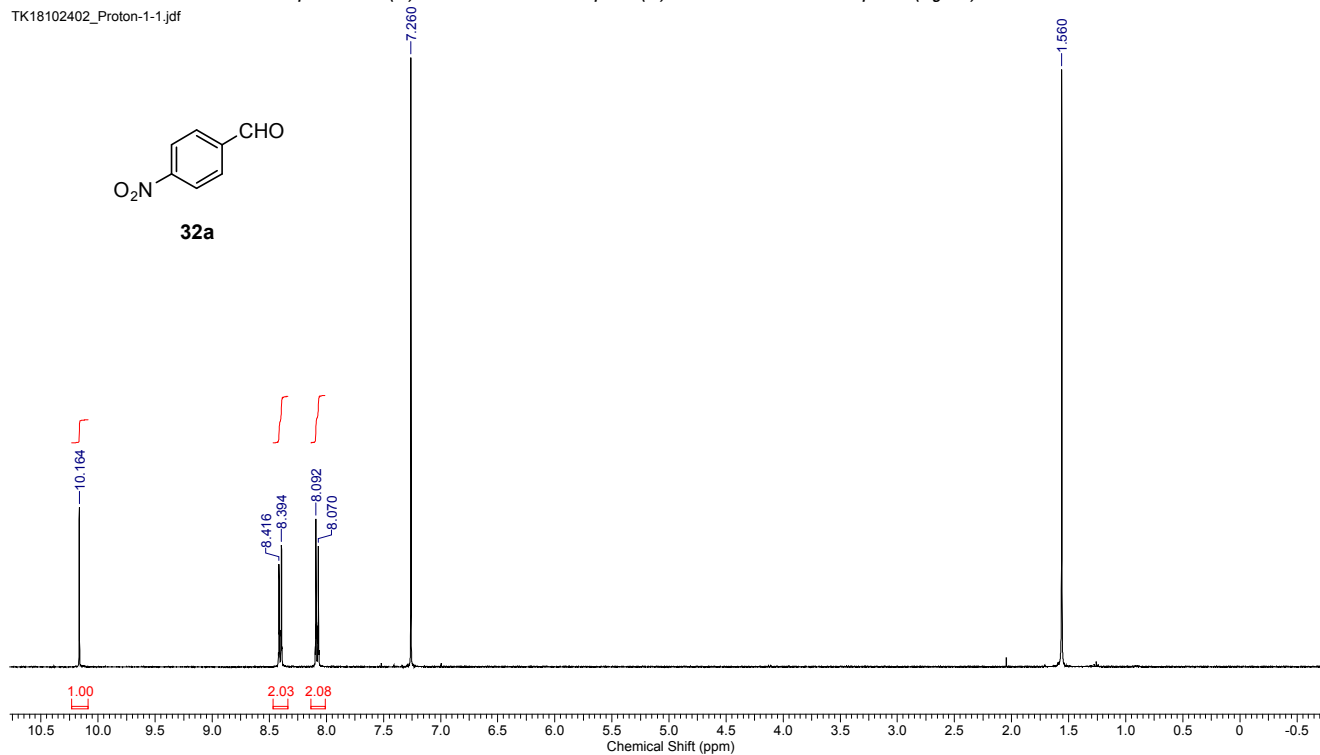

|                        |                                                                                       |                       |           |               |             |                  |             |
|------------------------|---------------------------------------------------------------------------------------|-----------------------|-----------|---------------|-------------|------------------|-------------|
| Acquisition Time (sec) | 0.8527                                                                                | Comment               | c13-NMR   | Date          | Mar 13 2019 | Date Stamp       | Mar 13 2019 |
| File Name              | Y:\Mac\Cloud\H\H\H\H\H\NMR\F\H\H\H\H\H\NMR\K\K\2018\NMR\K\K\2019\SK19031301_C.fid\fid |                       |           |               |             |                  |             |
| Number of Transients   | 672                                                                                   | Original Points Count | 19335     | Points Count  | 65536       | Pulse Sequence   | s2pul       |
| Solvent                | CHLOROFORM-d                                                                          | Spectrum Offset (Hz)  | 8956.6035 | Spectrum Type | STANDARD    | Receiver Gain    | 30.00       |
| Temperature (degree C) | AMBIENT TEMPERATURE                                                                   |                       |           |               |             | Sweep Width (Hz) | 22675.74    |

SK19031301\_C

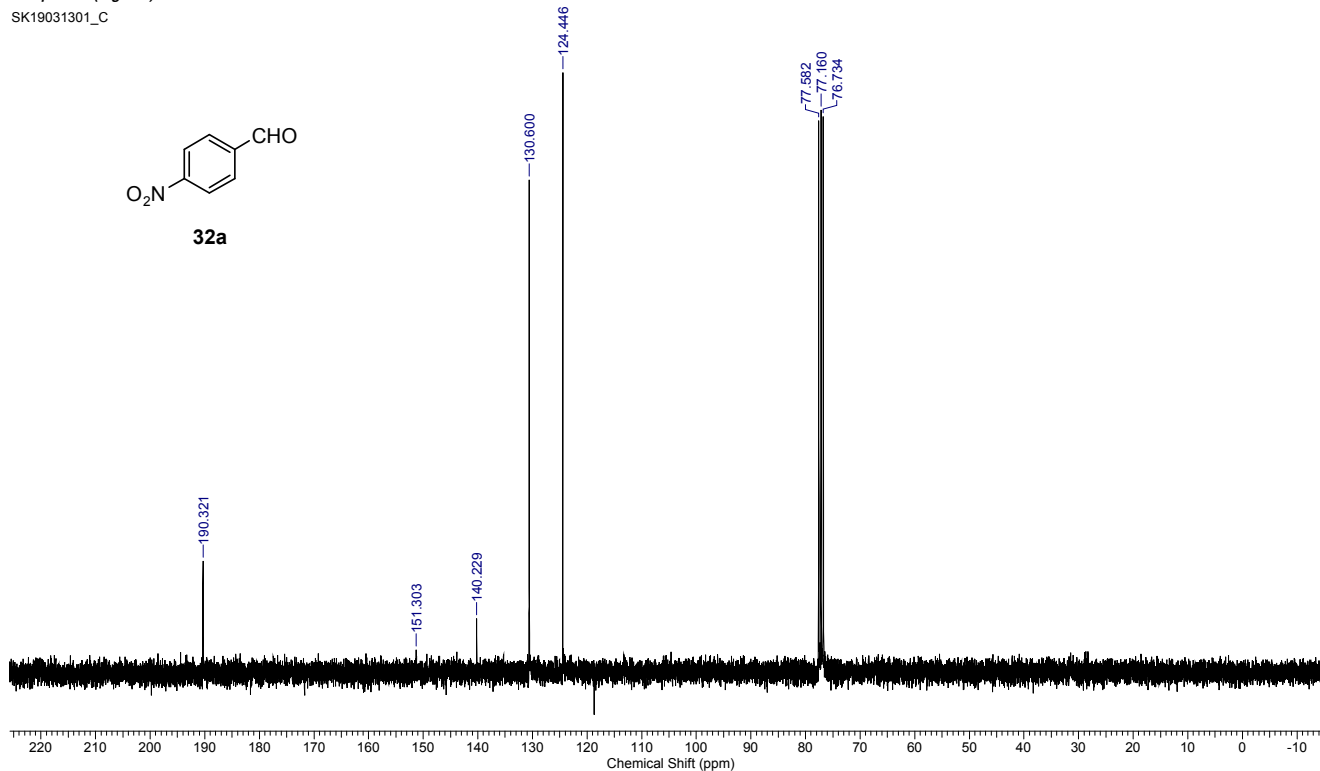

|                        |                                                                                                    |                      |                |                        |                      |
|------------------------|----------------------------------------------------------------------------------------------------|----------------------|----------------|------------------------|----------------------|
| Acquisition Time (sec) | 2.1863                                                                                             | Comment              | single pulse   | Date                   | 16 Oct 2018 08:24:46 |
| Date Stamp             | 16 Oct 2018 08:23:55                                                                               |                      |                |                        |                      |
| File Name              | Y:\Mac\Cloud\H\H\H\H\H\NMR\F\H\H\H\H\H\NMR\KV2018\NMR\JEOL\Y\H\H\NMR2018\TK18101603_Proton-1-1.jdf |                      |                |                        |                      |
| Frequency (MHz)        | 399.78                                                                                             | Nucleus              | <sup>1</sup> H | Number of Transients   | 8                    |
| Original Points Count  | 16384                                                                                              | Owner                | delta          | Points Count           | 32768                |
| Solvent                | CHLOROFORM-d                                                                                       | Spectrum Offset (Hz) | 2003.4905      | Sweep Width (Hz)       | 7494.00              |
|                        |                                                                                                    |                      |                | Origin                 | ECA                  |
|                        |                                                                                                    |                      |                | Pulse Sequence         | protonjxp            |
|                        |                                                                                                    |                      |                | Temperature (degree C) | 17.700               |

TK18101603\_Proton-1-1.jdf

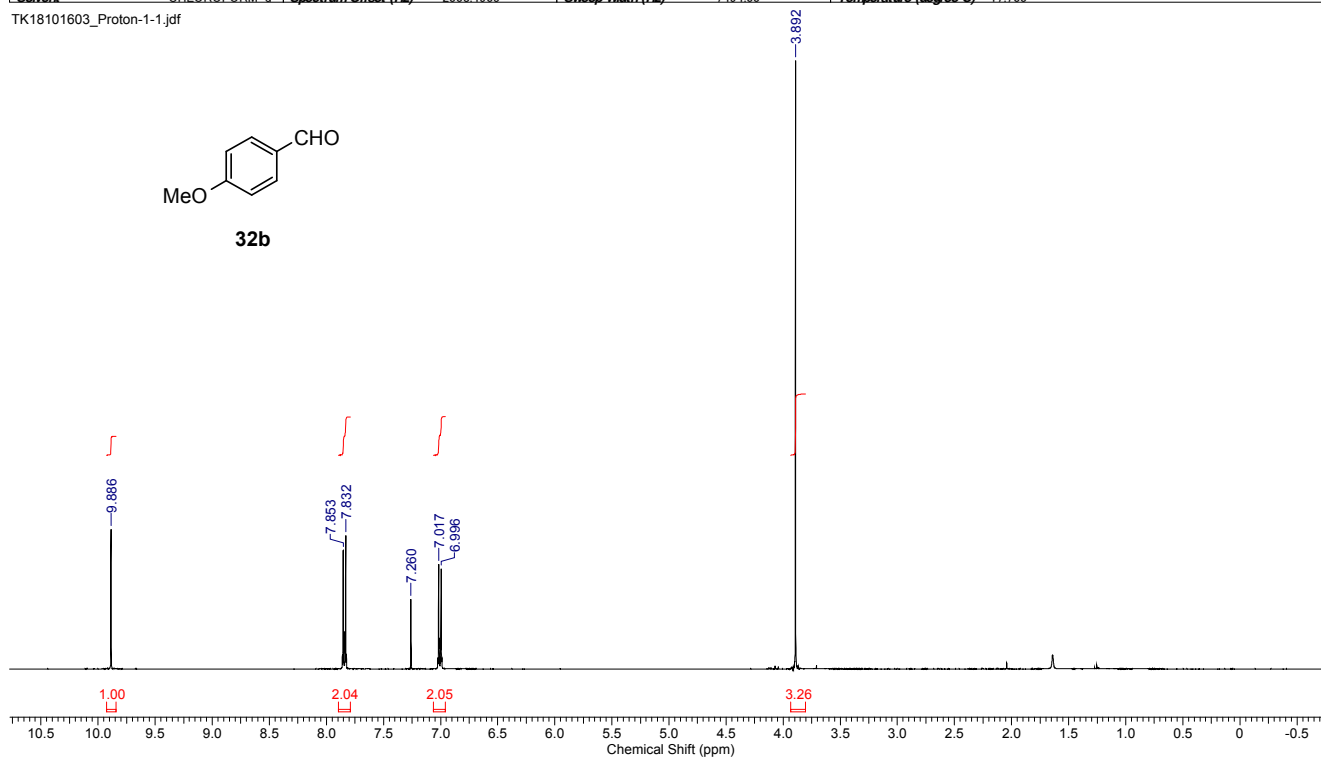

|                        |                                                                                                    |                      |                                  |                        |                      |
|------------------------|----------------------------------------------------------------------------------------------------|----------------------|----------------------------------|------------------------|----------------------|
| Acquisition Time (sec) | 1.0381                                                                                             | Comment              | single pulse decoupled gated NOE | Date                   | 01 Mar 2019 09:33:38 |
| Date Stamp             | 01 Mar 2019 09:23:36                                                                               |                      |                                  |                        |                      |
| File Name              | Y:\Mac\Cloud\H\H\H\H\H\NMR\F\H\H\H\H\H\NMR\KV2018\NMR\JEOL\Y\H\H\NMR2018\TK19022802_Carbon-1-1.jdf |                      |                                  |                        |                      |
| Frequency (MHz)        | 100.53                                                                                             | Nucleus              | <sup>13</sup> C                  | Number of Transients   | 256                  |
| Original Points Count  | 32768                                                                                              | Owner                | delta                            | Points Count           | 65536                |
| Solvent                | CHLOROFORM-d                                                                                       | Spectrum Offset (Hz) | 10047.0723                       | Sweep Width (Hz)       | 31565.66             |
|                        |                                                                                                    |                      |                                  | Origin                 | ECA                  |
|                        |                                                                                                    |                      |                                  | Pulse Sequence         | carbonjxp            |
|                        |                                                                                                    |                      |                                  | Temperature (degree C) | 21.400               |

TK19022802\_Carbon-1-1.jdf

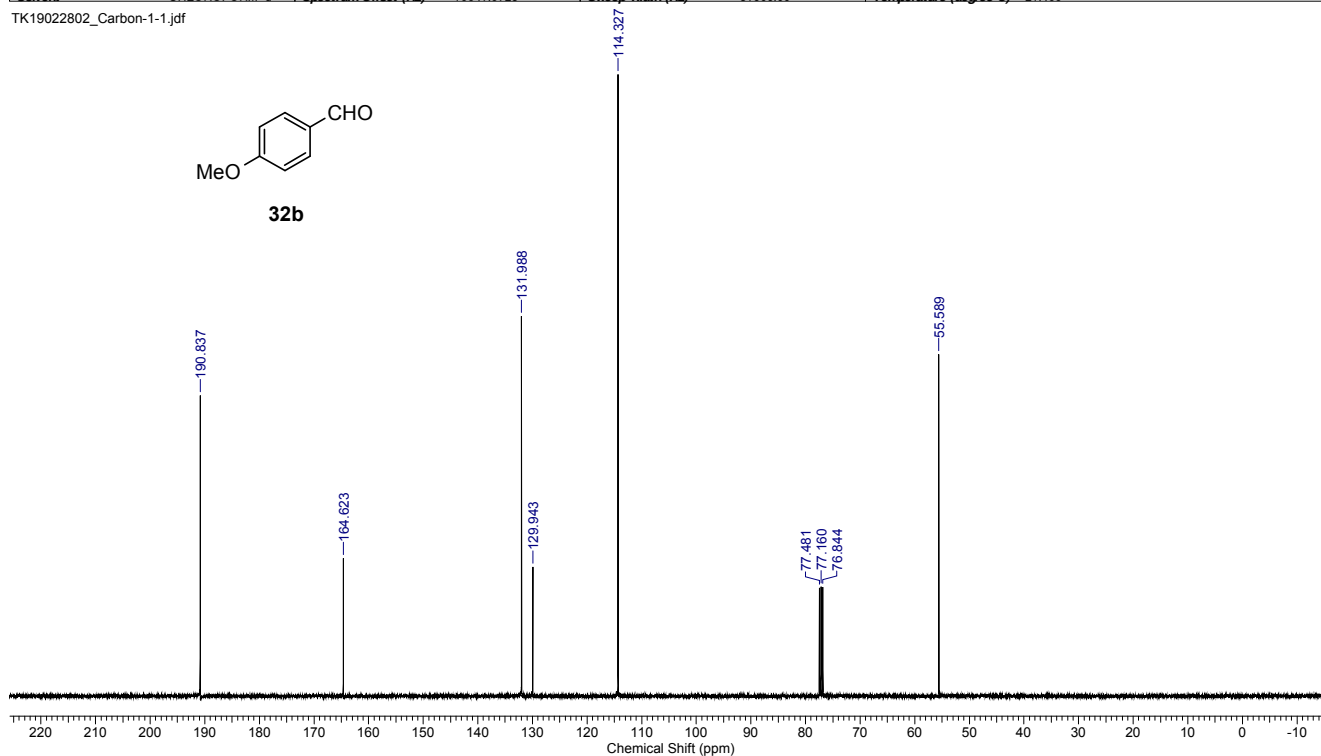

|                        |            |                |                                                                     |                        |                     |
|------------------------|------------|----------------|---------------------------------------------------------------------|------------------------|---------------------|
| Acquisition Time (sec) | 3.5561     | Comment        | STANDARD 1H OBSERVE                                                 | Date                   | Aug 8 2012          |
| Date Stamp             | Aug 8 2012 | File Name      | YYMacYiCloud\F\HHHH\HNMR\F\HF\HH\HY2012\NMR\KVsaka\12080801.fid\fid | Original Points Count  | 17080               |
| Frequency (MHz)        | 300.06     | Nucleus        | 1H                                                                  | Number of Transients   | 16                  |
| Points Count           | 65536      | Pulse Sequence | s2pul                                                               | Receiver Gain          | 16.00               |
| Spectrum Offset (Hz)   | 1752.1255  | Spectrum Type  | STANDARD                                                            | Sweep Width (Hz)       | 4803.07             |
|                        |            |                |                                                                     | Temperature (degree C) | AMBIENT TEMPERATURE |

36-H(12080801).esp

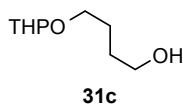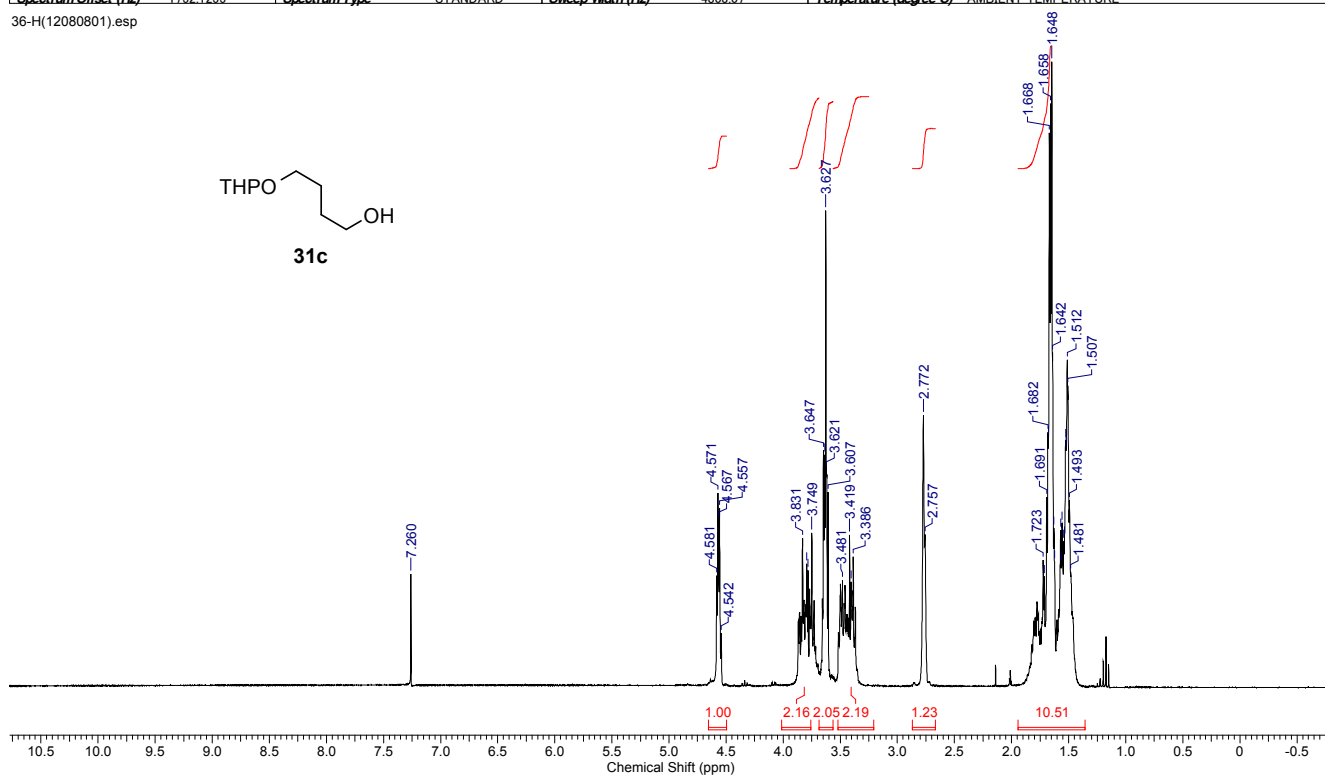

|                        |                                                                       |                       |         |              |            |                  |            |
|------------------------|-----------------------------------------------------------------------|-----------------------|---------|--------------|------------|------------------|------------|
| Acquisition Time (sec) | 0.8527                                                                | Comment               | c13-NMR | Date         | Aug 8 2012 | Date Stamp       | Aug 8 2012 |
| File Name              | YYMacYiCloud\F\HHHH\HNMR\F\HF\HH\HY2012\NMR\KVsaka\12080801.C.fid\fid | Original Points Count | 19335   | Points Count | 65536      | Frequency (MHz)  | 75.46      |
| Number of Transients   | 96                                                                    |                       |         |              |            | Pulse Sequence   | s2pul      |
| Solvent                | CHLOROFORM-d                                                          |                       |         |              |            | Receiver Gain    | 30.00      |
| Temperature (degree C) | AMBIENT TEMPERATURE                                                   |                       |         |              |            | Spectrum Type    | STANDARD   |
|                        |                                                                       |                       |         |              |            | Sweep Width (Hz) | 22675.74   |

12080801\_C

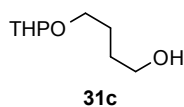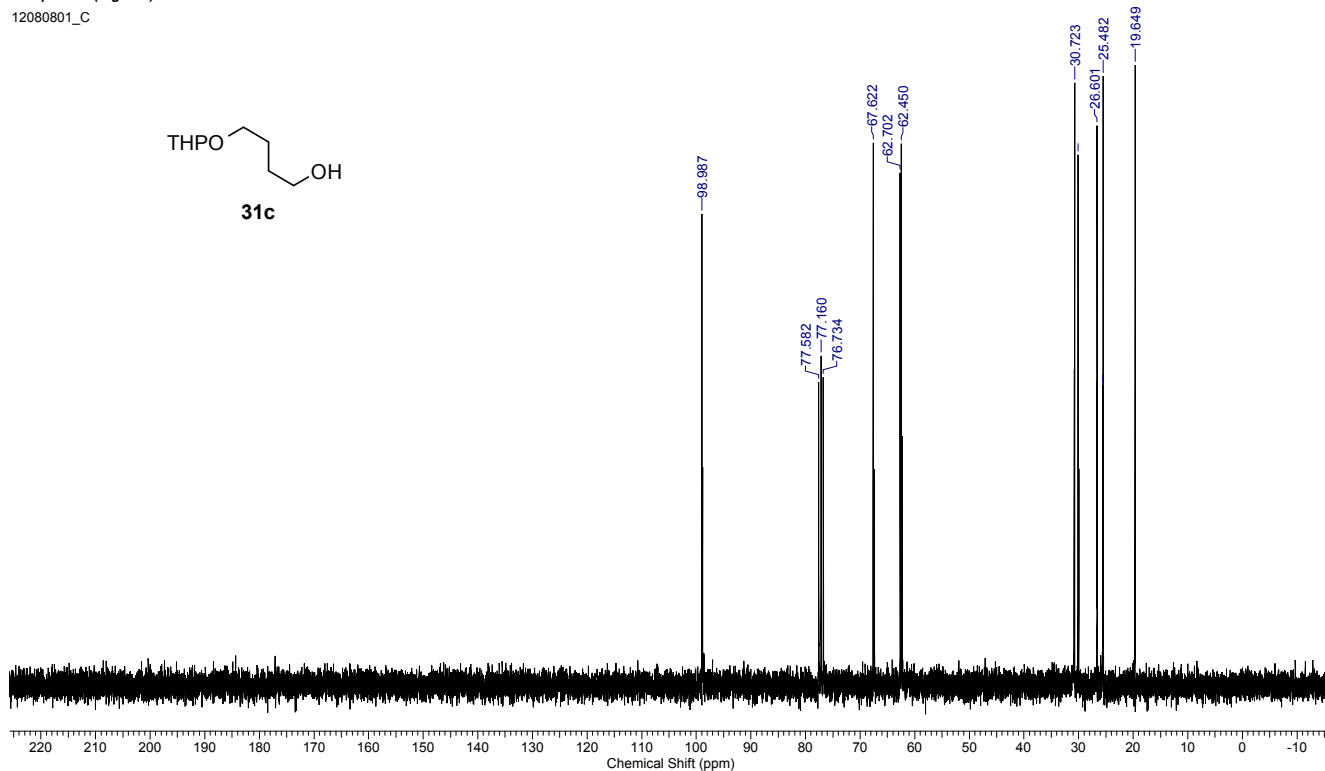

|                        |             |                |                                                                       |                        |                     |
|------------------------|-------------|----------------|-----------------------------------------------------------------------|------------------------|---------------------|
| Acquisition Time (sec) | 3.5561      | Comment        | STANDARD 1H OBSERVE                                                   | Date                   | Apr 23 2012         |
| Date Stamp             | Apr 23 2012 | File Name      | YYMacYiCloud\F\HHH\HH\NMR\F\HF\HH\FH\2012\NMR\KVsaka\12042301.fid\fid | Original Points Count  | 17080               |
| Frequency (MHz)        | 300.06      | Nucleus        | <sup>1</sup> H                                                        | Number of Transients   | 16                  |
| Points Count           | 65536       | Pulse Sequence | s2pul                                                                 | Receiver Gain          | 24.00               |
| Spectrum Offset (Hz)   | 1767.8837   | Spectrum Type  | STANDARD                                                              | Sweep Width (Hz)       | 4803.07             |
|                        |             |                |                                                                       | Solvent                | CHLOROFORM-d        |
|                        |             |                |                                                                       | Temperature (degree C) | AMBIENT TEMPERATURE |

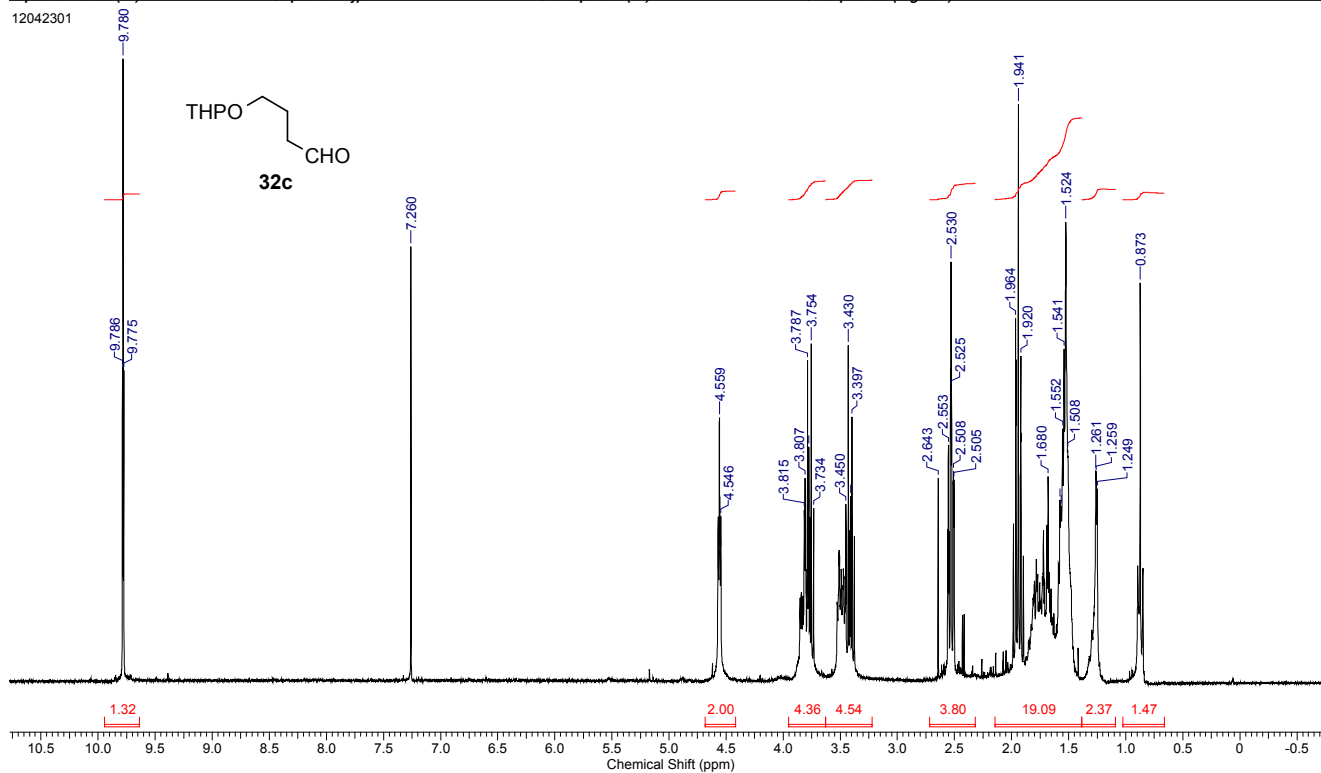

|                        |                                                                         |                       |         |                      |             |                  |             |
|------------------------|-------------------------------------------------------------------------|-----------------------|---------|----------------------|-------------|------------------|-------------|
| Acquisition Time (sec) | 0.8527                                                                  | Comment               | c13-NMR | Date                 | Jul 11 2012 | Date Stamp       | Jul 11 2012 |
| File Name              | YYMacYiCloud\F\HHH\HH\NMR\F\HF\HH\FH\2012\NMR\KVsaka\12071102.C.fid\fid | Original Points Count | 19335   | Points Count         | 65536       | Frequency (MHz)  | 75.46       |
| Number of Transients   | 64                                                                      |                       |         |                      |             | Pulse Sequence   | s2pul       |
| Solvent                | CHLOROFORM-d                                                            |                       |         | Spectrum Offset (Hz) | 8962.2070   | Receiver Gain    | 30.00       |
| Temperature (degree C) | AMBIENT TEMPERATURE                                                     |                       |         |                      |             | Spectrum Type    | STANDARD    |
|                        |                                                                         |                       |         |                      |             | Sweep Width (Hz) | 22675.74    |

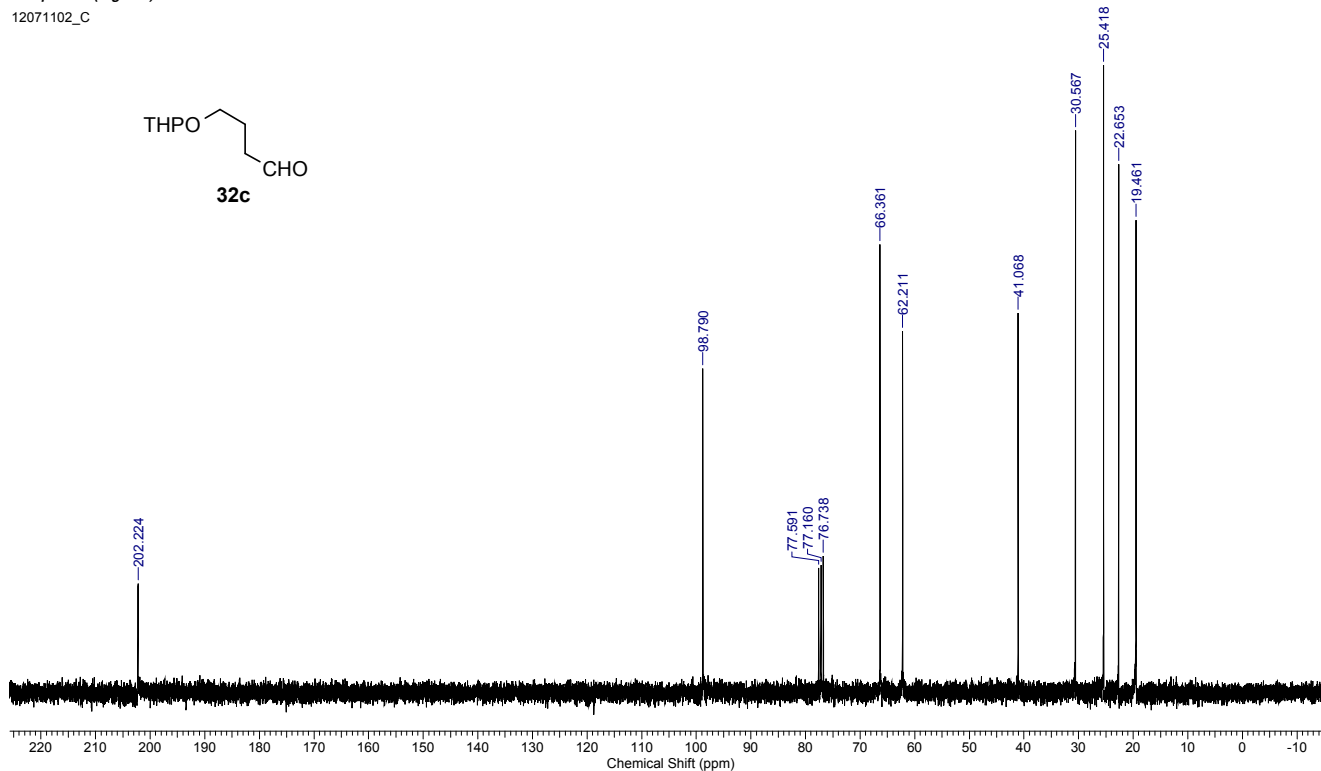



|                        |                                                                                                 |                      |                |                        |                      |
|------------------------|-------------------------------------------------------------------------------------------------|----------------------|----------------|------------------------|----------------------|
| Acquisition Time (sec) | 2.1863                                                                                          | Comment              | single pulse   | Date                   | 05 Feb 2019 13:33:59 |
| Date Stamp             | 05 Feb 2019 13:33:08                                                                            |                      |                |                        |                      |
| File Name              | Y:\Mac\Cloud\Y\HHHHHH\NMR\F\HFF\H\H\NMR\KV2018\NMR(JEOL)\Y\HH\NMR2018\TK19020501_Proton-1-1.fid |                      |                |                        |                      |
| Frequency (MHz)        | 399.78                                                                                          | Nucleus              | <sup>1</sup> H | Number of Transients   | 8                    |
| Original Points Count  | 16384                                                                                           | Owner                | delta          | Points Count           | 32768                |
| Solvent                | CHLOROFORM-d                                                                                    | Spectrum Offset (Hz) | 2003.4905      | Sweep Width (Hz)       | 7494.00              |
|                        |                                                                                                 |                      |                | Origin                 | ECA                  |
|                        |                                                                                                 |                      |                | Pulse Sequence         | proton1xp            |
|                        |                                                                                                 |                      |                | Temperature (degree C) | 22.100               |

39-H(TK19020501\_Proton-1-1).esp

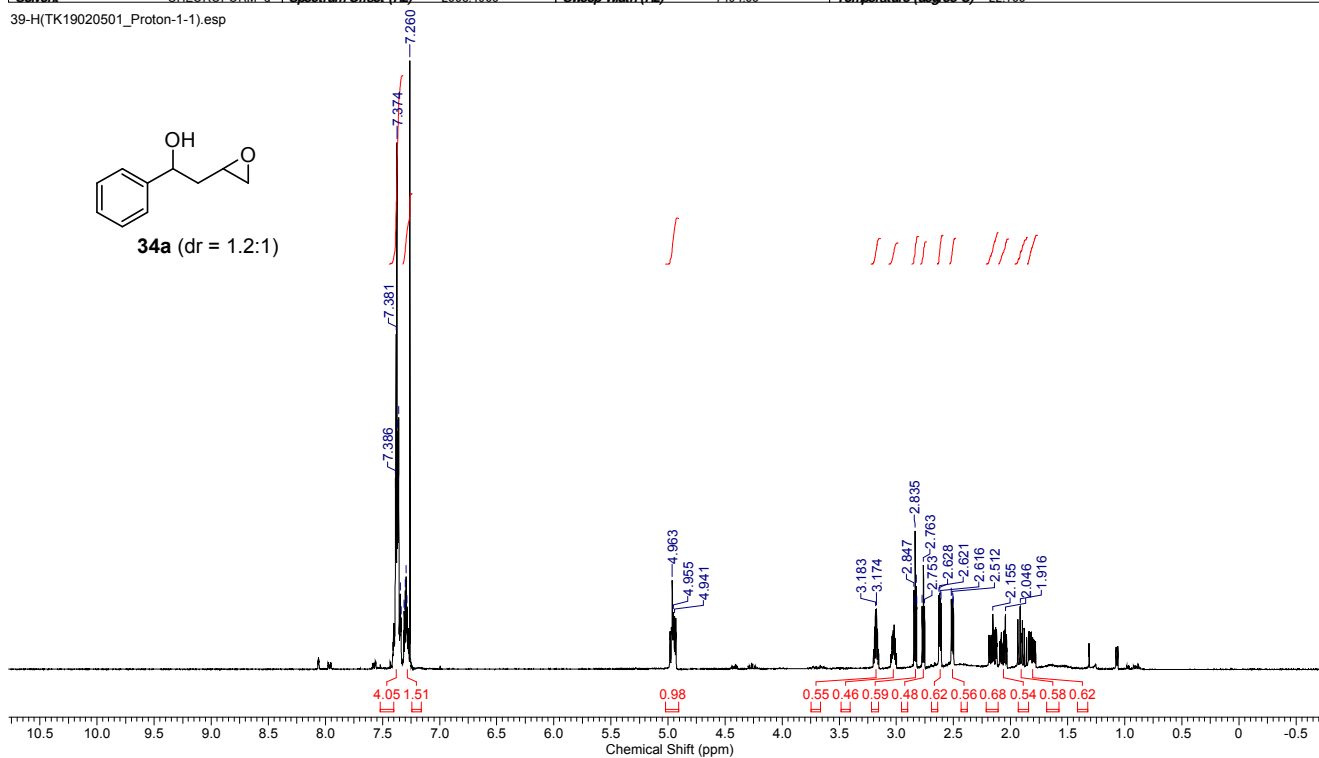

|                        |                                                                                              |                      |          |                        |                     |                      |             |
|------------------------|----------------------------------------------------------------------------------------------|----------------------|----------|------------------------|---------------------|----------------------|-------------|
| Acquisition Time (sec) | 0.8527                                                                                       | Comment              | c13-NMR  | Date                   | Feb 25 2019         | Date Stamp           | Feb 25 2019 |
| File Name              | Y:\Mac\Cloud\Y\HHHHHH\NMR\F\HFF\H\H\NMR\KV2018\NMR(casilent)\Ykawakami\TK19022503_C.fid\Yfid |                      |          |                        |                     |                      |             |
| Nucleus                | <sup>13</sup> C                                                                              | Number of Transients | 128      | Original Points Count  | 19335               | Points Count         | 65536       |
| Pulse Sequence         | s2pul                                                                                        | Receiver Gain        | 30.00    | Solvent                | CHLOROFORM-d        | Spectrum Offset (Hz) | 8949.3369   |
| Spectrum Type          | STANDARD                                                                                     | Sweep Width (Hz)     | 22675.74 | Temperature (degree C) | AMBIENT TEMPERATURE |                      |             |

TK19022503\_C

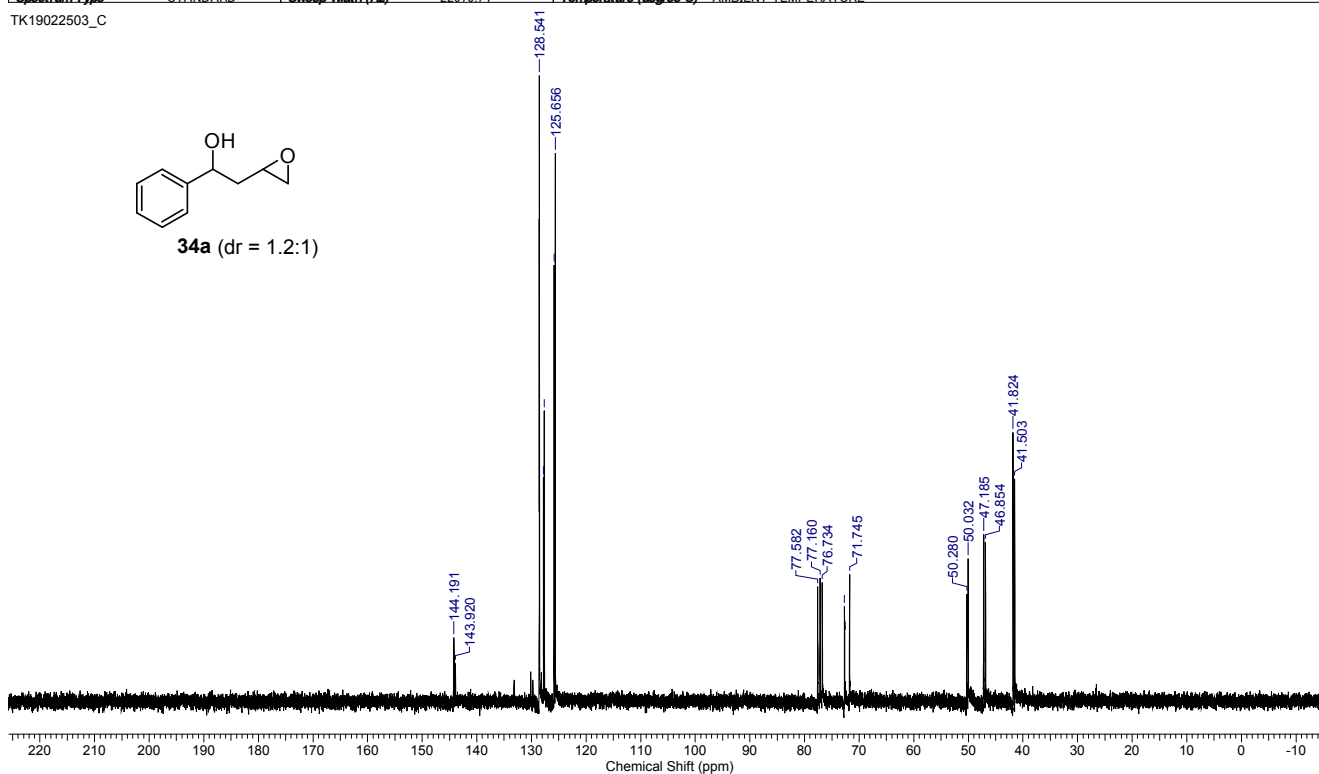



|                        |                                                                                                         |                      |                |                        |                      |
|------------------------|---------------------------------------------------------------------------------------------------------|----------------------|----------------|------------------------|----------------------|
| Acquisition Time (sec) | 2.1863                                                                                                  | Comment              | single pulse   | Date                   | 18 Feb 2019 12:01:30 |
| Date Stamp             | 18 Feb 2019 12:00:38                                                                                    |                      |                |                        |                      |
| File Name              | Y:\Mac\Cloud\H\H\H\H\H\NMR\F\H\H\F\H\H\H\H\NMR\K\2018\NMR\J\EQ\Y\H\H\NMR\2018\TK19021801_Proton-1-1.jdf |                      |                |                        |                      |
| Frequency (MHz)        | 399.78                                                                                                  | Nucleus              | <sup>1</sup> H | Number of Transients   | 8                    |
| Original Points Count  | 16384                                                                                                   | Owner                | delta          | Points Count           | 32768                |
| Solvent                | CHLOROFORM-d                                                                                            | Spectrum Offset (Hz) | 2003.4905      | Sweep Width (Hz)       | 7494.00              |
|                        |                                                                                                         |                      |                | Temperature (degree C) | 21.300               |

TK19021801\_Proton-1-1.jdf

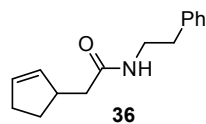

3:1 mixture of rotamers

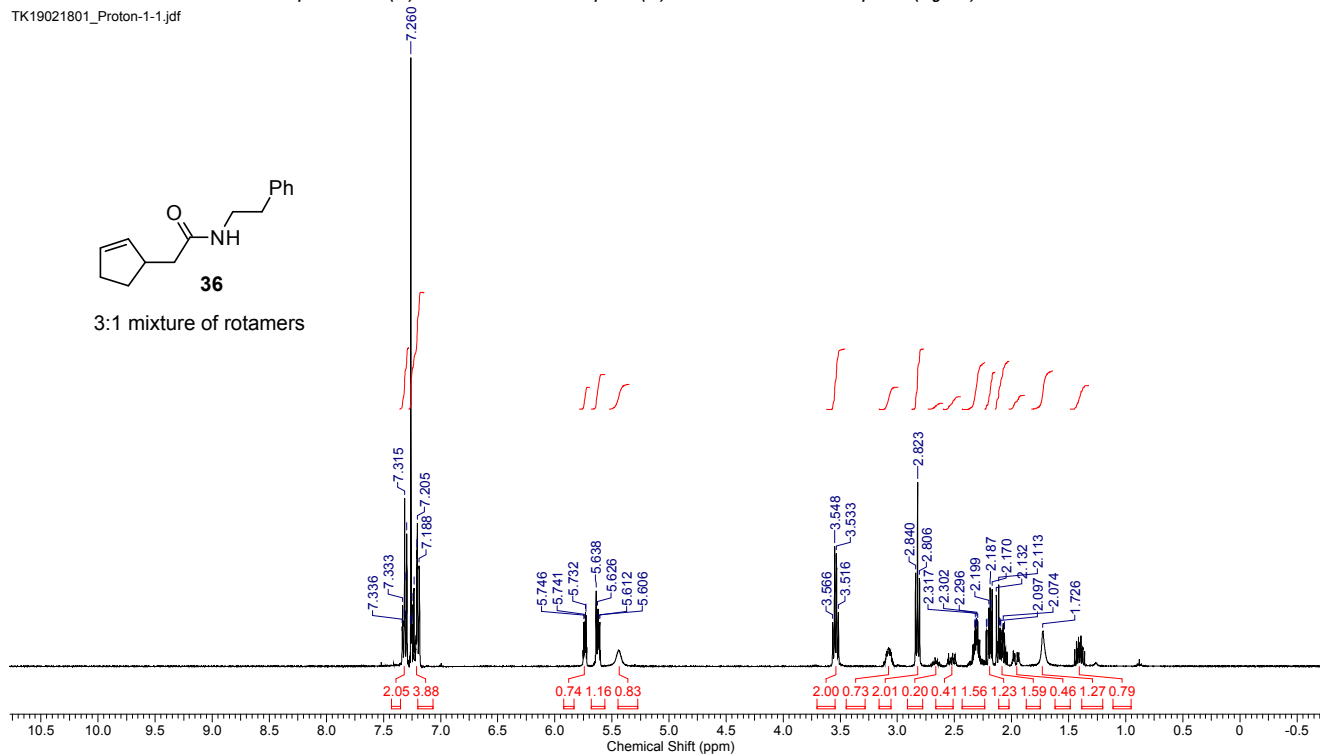

|                        |                                                                                                         |                      |                                  |                        |                      |
|------------------------|---------------------------------------------------------------------------------------------------------|----------------------|----------------------------------|------------------------|----------------------|
| Acquisition Time (sec) | 1.0381                                                                                                  | Comment              | single pulse decoupled gated NOE | Date                   | 02 Mar 2019 09:12:02 |
| Date Stamp             | 02 Mar 2019 08:52:10                                                                                    |                      |                                  |                        |                      |
| File Name              | Y:\Mac\Cloud\H\H\H\H\H\NMR\F\H\H\F\H\H\H\H\NMR\K\2018\NMR\J\EQ\Y\H\H\NMR\2018\TK19030203_Carbon-1-1.jdf |                      |                                  |                        |                      |
| Frequency (MHz)        | 100.53                                                                                                  | Nucleus              | <sup>13</sup> C                  | Number of Transients   | 512                  |
| Original Points Count  | 32768                                                                                                   | Owner                | delta                            | Points Count           | 65536                |
| Solvent                | CHLOROFORM-d                                                                                            | Spectrum Offset (Hz) | 10038.8838                       | Sweep Width (Hz)       | 31565.66             |
|                        |                                                                                                         |                      |                                  | Temperature (degree C) | 20.500               |

TK19030203\_Carbon-1-1.jdf

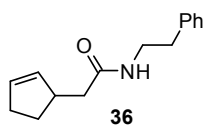

3:1 mixture of rotamers

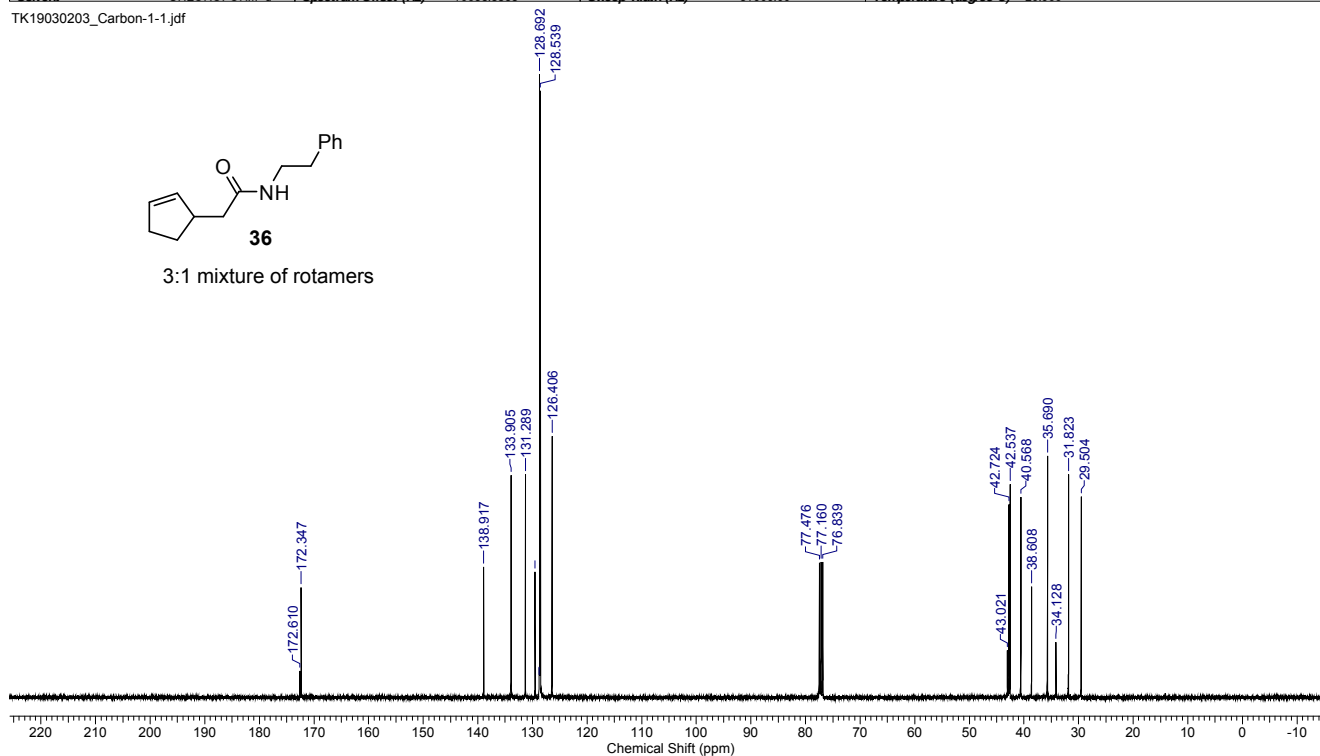

Supplement: ASIA-14-3921-s001.pdf [file ASIA-14-3921-s001.pdf]
